# Supplementary material for: A one-pot protocol for the synthesis of β-ketosulfones from α,α-dibromoketones
Source: Royal Society of Chemistry journal article supplement (doi:10.1039/c9qo00440h), 2019-01-01
Supplement: c9qo00440h1.pdf [file c9qo00440h1.pdf]

*Supporting Information*

**A One-pot Protocol for the Synthesis of  $\beta$ -Ketosulfones from  
 $\alpha,\alpha$ -Dibromoketones**

|                                                          |           |
|----------------------------------------------------------|-----------|
| 1. General information.....                              | S2        |
| 2. General procedure for the synthesis of <b>3</b> ..... | S2        |
| 3. Analytic Data for compounds.....                      | S2 – S8   |
| 4. References.....                                       | S10       |
| 5. Copies of NMR spectra.....                            | S11 – S46 |

### 1. General information

Commercially available materials were used as received, unless otherwise noted.  $^1\text{H}$  NMR and  $^{13}\text{C}$  NMR spectras were measured on a 500 MHz spectrometer ( $^1\text{H}$ : 500 MHz,  $^{13}\text{C}$ : 125 MHz), using  $\text{d}^6\text{-DMSO}$  or  $\text{CDCl}_3$  as the solvent with tetramethylsilane (TMS) as an internal standard at room temperature. Chemical shifts are given in  $\delta$  relative to TMS, the coupling constants  $J$  are given in Hz. Melting points were measured on X4 melting point apparatus and uncorrected.  $\alpha,\alpha$ -Dibromoketones **1** are synthesized according to procedure in literature.<sup>1</sup>

### 2. General Procedure for the Synthesis of $\beta$ -ketosulfones **3**.

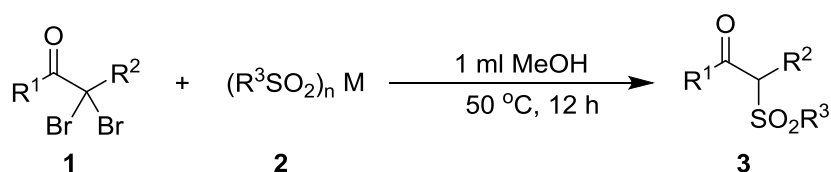

To a 10 mL-Schlenk tube with a magnetic stirring bar was charged with sulfinate **2** (0.6 mmol),  $\alpha,\alpha$ -dibromoketone **1** (0.2 mmol), and MeOH (2 mL) under nitrogen atmosphere. The reaction was stirred at 50  $^\circ\text{C}$  for 12 h. The reaction mixture was then cooled to room temperature and evaporated under vacuum. The residue was purified by flash column chromatography (petroleum ether/ethyl acetate) to afford the target products (**3**).

### 3. Data for compounds

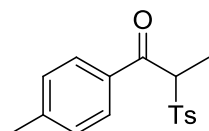

**1-p-tolyl-2-tosylpropan-1-one 3aa**:<sup>2</sup> white solid (isolated yield: 93%); m.p. 104–105  $^\circ\text{C}$ ;  $^1\text{H}$  NMR (500 MHz,  $\text{CDCl}_3$ )  $\delta$  7.88 (d,  $J = 7.8$  Hz, 2 H), 7.65 (d,  $J = 7.8$  Hz, 2 H), 7.37 – 7.21 (m, 4 H), 5.13 (q,  $J = 6.6$  Hz, 1 H), 2.48 – 2.33 (m, 6 H), 1.54 (d,  $J = 6.7$  Hz, 3 H);  $^{13}\text{C}$  NMR (125 MHz;  $\text{CDCl}_3$ )  $\delta$  192.1, 145.3, 145.2, 133.9, 133.1, 129.8, 129.5, 129.4, 129.4, 64.9, 21.7, 21.7, 13.2.

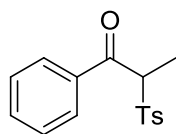

**1-phenyl-2-tosylpropan-1-one (3ba)**:<sup>3</sup> white solid (isolated yield: 98% from reaction

of **1b** and **2a**, 92% from reaction of **1b** and **2g**); m.p. 93–95 °C; <sup>1</sup>H NMR (500 MHz, CDCl<sub>3</sub>) δ 7.98 (d, *J* = 7.3 Hz, 2H), 7.66 (d, *J* = 8.2 Hz, 2H), 7.61 (t, *J* = 7.4 Hz, 1H), 7.48 (t, *J* = 7.8 Hz, 2H), 7.31 (d, *J* = 8.0 Hz, 2H), 5.15 (q, *J* = 6.9 Hz, 1H), 2.43 (s, 3H), 1.56 (d, *J* = 6.9 Hz, 3H); <sup>13</sup>C NMR (125 MHz; CDCl<sub>3</sub>) δ 192.6, 145.3, 136.3, 134.0, 133.1, 129.8, 129.5, 129.2, 128.7, 65.1, 21.7, 13.2.

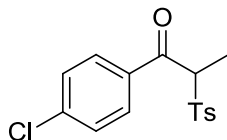

**1-(4-chlorophenyl)-2-tosylpropan-1-one (3ca):**<sup>2</sup> white solid (isolated yield: 96%); m.p. 126–127 °C; <sup>1</sup>H NMR (500 MHz, CDCl<sub>3</sub>) δ 7.93 (d, *J* = 8.4 Hz, 2 H), 7.63 (d, *J* = 8.0 Hz, 2 H), 7.44 (d, *J* = 8.4 Hz, 2 H), 7.31 (d, *J* = 8.0 Hz, 2 H), 5.10 (q, *J* = 6.9 Hz, 1 H), 2.43 (s, 3 H), 1.54 (d, *J* = 6.9 Hz, 3 H); <sup>13</sup>C NMR (125 MHz; CDCl<sub>3</sub>) δ 191.4, 145.5, 140.7, 134.7, 132.9, 130.6, 129.8, 129.6, 129.1, 65.2, 21.7, 13.1.

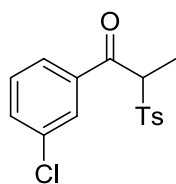

**1-(3-chlorophenyl)-2-tosylpropan-1-one (3da):**<sup>2</sup> white solid (isolated yield: 96%); m.p. 105 – 106 °C; <sup>1</sup>H NMR (500 MHz, CDCl<sub>3</sub>) δ 7.89 – 7.84 (m, 2H), 7.64 (d, *J* = 8.3 Hz, 2H), 7.59 – 7.51 (m, 1H), 7.42 (t, *J* = 8.2 Hz, 1H), 7.31 (d, *J* = 8.1 Hz, 2H), 5.08 (q, *J* = 6.9 Hz, 1H), 2.43 (s, 3H), 1.55 (d, *J* = 6.9 Hz, 3H); <sup>13</sup>C NMR (125 MHz, CDCl<sub>3</sub>) δ 191.5, 145.6, 137.8, 135.1, 133.8, 133.0, 130.0, 129.8, 129.6, 129.0, 127.3, 65.3, 21.7, 13.0; HRMS (ESI): calcd for C<sub>16</sub>H<sub>16</sub>ClO<sub>3</sub>S<sup>+</sup> ([M + H]<sup>+</sup>) 323.0503, found 323.0511.

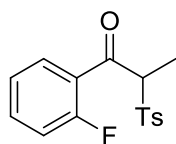

**1-(2-fluorophenyl)-2-tosylpropan-1-one (3ea):**<sup>2</sup> white solid (isolated yield: 96%); m.p. 83–84 °C; <sup>1</sup>H NMR (500 MHz, CDCl<sub>3</sub>) δ 7.79 – 7.72 (m, 1 H), 7.67 (d, *J* = 8.3 Hz, 2 H), 7.58 – 7.50 (m, 1 H), 7.29 (d, *J* = 8.1 Hz, 2 H), 7.25 – 7.18 (m, 1 H), 7.10 (dd, *J* = 11.5, 8.4 Hz, 1 H), 5.17 (qd, *J* = 6.9, 3.0 Hz, 1 H), 2.42 (s, 3 H), 1.57 (d, *J* = 6.9 Hz, 3 H); <sup>13</sup>C NMR (125 MHz; CDCl<sub>3</sub>) δ 191.1 (d, *J* = 3.8 Hz), 161.5 (d, *J* = 252.5 Hz), 145.2, 135.4 (d, *J* = 8.8 Hz), 133.8, 131.1 (d, *J* = 1.3 Hz), 129.6, 129.5, 125.7 (d, *J* = 11.3 Hz), 124.7 (d, *J* = 2.5 Hz), 116.7 (d, *J* = 23.8 Hz), 69.2 (d, *J* = 8.8 Hz), 21.6, 12.4.

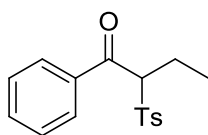

**1-phenyl-2-tosylbutan-1-one (3fa):**<sup>3</sup> white solid (isolated yield: 90%); m.p. 73–74 °C; <sup>1</sup>H NMR (500 MHz, CDCl<sub>3</sub>) δ 7.97 (d, *J* = 7.9 Hz, 2 H), 7.65 (d, *J* = 8.2 Hz, 2 H), 7.60 (t, *J* = 7.4 Hz, 1 H), 7.47 (t, *J* = 7.8 Hz, 2 H), 7.29 (d, *J* = 8.2 Hz, 2 H), 5.01 (dd, *J* = 10.8, 3.6 Hz, 1 H), 2.41 (s, 3 H), 2.21–2.11 (m, 1 H), 2.10–1.99 (m, 1 H), 0.87 (t, *J* = 7.4 Hz, 3 H); <sup>13</sup>C NMR (125 MHz, CDCl<sub>3</sub>) δ 192.8, 145.3, 137.5, 133.9, 133.6, 129.8, 129.5, 129.0, 128.7, 71.5, 22.0, 21.6, 11.5.

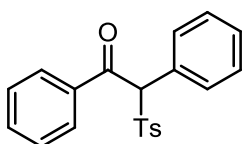

**1,2-diphenyl-2-tosylethanone (3ga):**<sup>2</sup> white solid (isolated yield: 94%); m.p. 145–146 °C; <sup>1</sup>H NMR (500 MHz, CDCl<sub>3</sub>) δ 7.87 (d, *J* = 7.3 Hz, 2 H), 7.51 (d, *J* = 8.3 Hz, 3 H), 7.43–7.31 (m, 5 H), 7.31–7.25 (m, 2 H), 7.20 (d, *J* = 8.1 Hz, 2 H), 6.14 (s, 1 H), 2.39 (s, 3 H); <sup>13</sup>C NMR (126 MHz, CDCl<sub>3</sub>) δ 190.82, 145.0, 136.1, 134.0, 133.9, 130.5, 130.3, 129.6, 129.1, 128.9, 128.8, 128.8, 128.7, 76.1, 21.7.

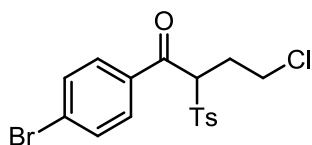

**1-(4-bromophenyl)-4-chloro-2-tosylbutan-1-one (3ha):**<sup>2</sup> white solid (isolated yield: 82%); m.p. 145–146 °C; <sup>1</sup>H NMR (500 MHz, CDCl<sub>3</sub>) δ 7.83 (d, *J* = 8.7 Hz, 2 H), 7.60 (t, *J* = 8.5 Hz, 4 H), 7.29 (d, *J* = 8.0 Hz, 2 H), 5.35 (dd, *J* = 8.1, 5.8 Hz, 1 H), 3.71–3.64 (m, 1 H), 3.37–3.29 (m, 1 H), 2.57–2.50 (m, 2 H), 2.43 (s, 3 H); <sup>13</sup>C NMR (125 MHz, CDCl<sub>3</sub>) δ 190.9, 145.9, 135.5, 133.2, 132.1, 130.6, 129.8, 129.8, 129.6, 67.4, 41.6, 30.5, 21.7; HRMS (ESI): calcd for C<sub>17</sub>H<sub>17</sub>BrClO<sub>3</sub>S<sup>+</sup> ([M + H]<sup>+</sup>) 414.9765, found 414.9765.

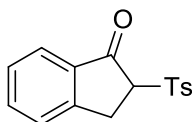

**2-tosyl-2,3-dihydro-1H-inden-1-one (3ia):**<sup>4</sup> white solid (isolated yield: 94%); m.p. 131–132 °C; <sup>1</sup>H NMR (500 MHz, CDCl<sub>3</sub>) δ 7.80 (d, *J* = 8.3 Hz, 2 H), 7.71 (d, *J* = 7.7 Hz, 1 H), 7.64–7.59 (m, 1 H), 7.49 (d, *J* = 7.7 Hz, 1 H), 7.40–7.33 (m, 3 H), 4.26 (dd, *J* = 8.4, 3.4 Hz, 1 H), 3.80 (dd, *J* = 18.2, 3.3 Hz, 1 H), 3.53 (dd, *J* = 18.2, 8.4 Hz, 1 H), 2.44 (s, 3

H);  $^{13}\text{C}$  NMR (125 MHz,  $\text{CDCl}_3$ )  $\delta$  194.6, 151.9, 145.3, 135.9, 135.8, 134.6, 129.7, 129.3, 128.2, 126.4, 124.8, 68.8, 28.2, 21.7.

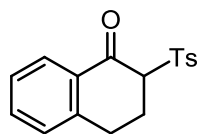

**2-tosyl-3,4-dihydronaphthalen-1(2H)-one (3ja):**<sup>5</sup> white solid (isolated yield: 71%); m.p. 138–140 °C;  $^1\text{H}$  NMR (500 MHz,  $\text{CDCl}_3$ )  $\delta$  7.98 (dd,  $J = 7.9, 1.1$  Hz, 1 H), 7.79 (d,  $J = 8.3$  Hz, 2 H), 7.51 (td,  $J = 7.5, 1.4$  Hz, 1 H), 7.35 (d,  $J = 8.0$  Hz, 2 H), 7.30 (t,  $J = 7.5$  Hz, 1 H), 7.26 (d,  $J = 7.7$  Hz, 1 H), 4.09 (t,  $J = 5.7$  Hz, 1 H), 3.56 – 3.44 (m, 1 H), 3.02 – 2.93 (m, 1 H), 2.90 – 2.79 (m, 1 H), 2.68 – 2.58 (m, 1 H), 2.45 (s, 3 H);  $^{13}\text{C}$  NMR (125 MHz, DMSO)  $\delta$  188.6, 144.5, 143.8, 136.2, 134.4, 131.6, 129.6, 129.1, 128.5, 126.9, 126.9, 68.3, 25.9, 23.3, 21.2.

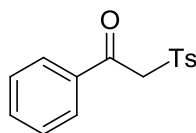

**1-phenyl-2-tosylethanone (3ka, Table 2):**<sup>6</sup> white solid (isolated yield: 94%); m.p. 98–99 °C;  $^1\text{H}$  NMR (500 MHz,  $\text{CDCl}_3$ )  $\delta$  7.94 (d,  $J = 7.2$  Hz, 2 H), 7.76 (d,  $J = 8.3$  Hz, 2 H), 7.61 (t,  $J = 7.4$  Hz, 1 H), 7.47 (t,  $J = 7.8$  Hz, 2 H), 7.32 (d,  $J = 8.0$  Hz, 2 H), 4.72 (s, 2 H), 2.43 (s, 3 H);  $^{13}\text{C}$  NMR (125 MHz,  $\text{CDCl}_3$ )  $\delta$  188.2, 145.4, 135.9, 135.8, 134.3, 129.8, 129.3, 128.8, 128.6, 63.6, 21.7.

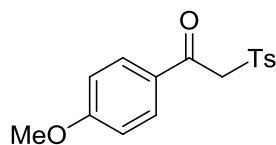

**1-(4-methoxyphenyl)-2-tosylethanone (3la):**<sup>3</sup> white solid (isolated yield: 94%); m.p. 122–123 °C;  $^1\text{H}$  NMR (500 MHz,  $\text{CDCl}_3$ )  $\delta$  7.93 (d,  $J = 8.9$  Hz, 2 H), 7.75 (d,  $J = 8.2$  Hz, 2 H), 7.32 (d,  $J = 8.0$  Hz, 2 H), 6.94 (d,  $J = 8.9$  Hz, 2 H), 4.66 (s, 2 H), 3.87 (s, 3 H), 2.43 (s, 3 H);  $^{13}\text{C}$  NMR (125 MHz, DMSO)  $\delta$  187.0, 163.9, 144.4, 136.8, 131.6, 129.6, 128.8, 128.0, 113.9, 62.3, 55.7, 21.0.

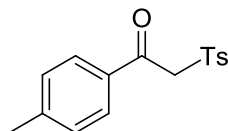

**1-p-tolyl-2-tosylethanone (3ma):**<sup>6</sup> white solid (isolated yield: 94%); m.p. 110–112 °C;  $^1\text{H}$  NMR (500 MHz,  $\text{CDCl}_3$ )  $\delta$  7.84 (d,  $J = 8.3$  Hz, 2 H), 7.75 (d,  $J = 8.3$  Hz, 2 H), 7.33 (d,  $J = 8.0$  Hz, 2 H), 7.27 (d,  $J = 8.4$  Hz, 2 H), 4.69 (s, 2 H), 2.44 (s, 3 H), 2.42 (s, 3 H);

$^{13}\text{C}$  NMR (125 MHz,  $\text{CDCl}_3$ )  $\delta$  187.7, 145.5, 145.3, 135.9, 133.4, 129.8, 129.5, 129.5, 128.6, 63.6, 21.8, 21.7.

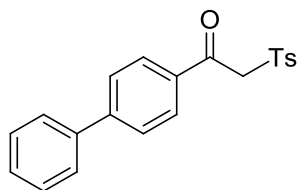

**1-(biphenyl-4-yl)-2-tosylethanone (3na):**<sup>7</sup> white solid (isolated yield: 92%); m.p. 117–118 °C;  $^1\text{H}$  NMR (500 MHz,  $\text{CDCl}_3$ )  $\delta$  8.01 (d,  $J$  = 8.4 Hz, 2 H), 7.77 (d,  $J$  = 8.3 Hz, 2 H), 7.68 (d,  $J$  = 8.4 Hz, 2 H), 7.61 (d,  $J$  = 7.2 Hz, 2 H), 7.47 (t,  $J$  = 7.4 Hz, 2 H), 7.41 (t,  $J$  = 7.3 Hz, 1 H), 7.33 (d,  $J$  = 8.1 Hz, 2 H), 4.74 (s, 2 H), 2.42 (s, 3 H);  $^{13}\text{C}$  NMR (125 MHz,  $\text{CDCl}_3$ )  $\delta$  187.7, 147.0, 145.4, 139.4, 135.8, 134.5, 130.0, 129.9, 129.1, 128.6, 128.6, 127.4, 127.3, 63.7, 21.7.

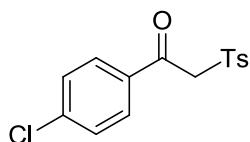

**1-(4-chlorophenyl)-2-tosylethanone (3oa):**<sup>6</sup> white solid (isolated yield: 83%); m.p. 133–134 °C;  $^1\text{H}$  NMR (500 MHz,  $\text{CDCl}_3$ )  $\delta$  7.90 (d,  $J$  = 8.7 Hz, 2 H), 7.74 (d,  $J$  = 8.3 Hz, 2 H), 7.45 (d,  $J$  = 8.7 Hz, 2 H), 7.34 (d,  $J$  = 8.0 Hz, 2 H), 4.68 (s, 2 H), 2.45 (s, 3 H);  $^{13}\text{C}$  NMR (125 MHz,  $\text{d}^6$ -DMSO)  $\delta$  188.1, 144.6, 139.2, 136.5, 134.5, 130.9, 129.6, 128.8, 128.0, 62.5, 21.0.

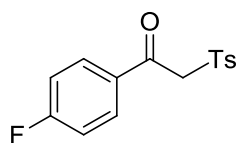

**1-(4-fluorophenyl)-2-tosylethanone (3pa):**<sup>3</sup> white solid (isolated yield: 87%); m.p. 132–133 °C;  $^1\text{H}$  NMR (500 MHz,  $\text{CDCl}_3$ )  $\delta$  8.04–7.96 (m, 2 H), 7.75 (d,  $J$  = 8.3 Hz, 2 H), 7.34 (d,  $J$  = 8.0 Hz, 2 H), 7.15 (t,  $J$  = 8.6 Hz, 2 H), 4.69 (s, 2 H), 2.45 (s, 3 H);  $^{13}\text{C}$  NMR (125 MHz,  $\text{d}^6$ -DMSO)  $\delta$  187.6, 165.5 (d,  $J$  = 251.3 Hz), 144.6, 136.6, 132.6 (d,  $J$  = 2.5 Hz), 132.2 (d,  $J$  = 8.8 Hz), 129.6, 128.0, 115.8 (d,  $J$  = 21.3 Hz), 62.4, 21.0.

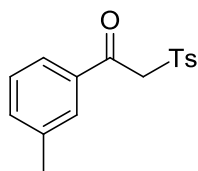

**1-*m*-tolyl-2-tosylethanone (3qa):**<sup>3</sup> white solid (isolated yield: 88%); m.p. 93–94 °C;  $^1\text{H}$  NMR (500 MHz,  $\text{CDCl}_3$ )  $\delta$  7.81–7.66 (m, 4 H), 7.45–7.28 (m, 4 H), 4.70 (s, 2 H), 2.43 (s, 3 H), 2.39 (s, 3 H);  $^{13}\text{C}$  NMR (125 MHz,  $\text{CDCl}_3$ )  $\delta$  188.3, 145.3, 138.7, 135.9, 135.8, 135.1, 129.8, 129.7, 128.7, 128.6, 126.6, 63.6, 21.7, 21.3.

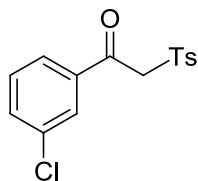

**1-(3-chlorophenyl)-2-tosylethanone (3ra):**<sup>3</sup> white solid (isolated yield: 86%); m.p. 120–121 °C; <sup>1</sup>H NMR (500 MHz, CDCl<sub>3</sub>) δ 7.87–7.81 (m, 2 H), 7.75 (d, *J* = 8.3 Hz, 2 H), 7.60–7.55 (m, 1 H), 7.43 (t, *J* = 8.1 Hz, 1 H), 7.34 (d, *J* = 8.0 Hz, 2 H), 4.69 (s, 2 H), 2.44 (s, 3 H); <sup>13</sup>C NMR (125 MHz, CDCl<sub>3</sub>) δ 187.1, 145.6, 137.3, 135.6, 135.2, 134.2, 130.2, 129.9, 129.1, 128.6, 127.6, 63.7, 21.7.

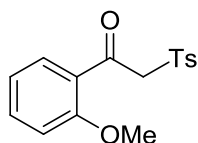

**1-(2-methoxyphenyl)-2-tosylethanone (3sa):**<sup>3</sup> white solid (isolated yield: 97%); m.p. 84–85 °C; <sup>1</sup>H NMR (500 MHz, CDCl<sub>3</sub>) δ 7.74 (d, *J* = 8.3 Hz, 2 H), 7.65 (dd, *J* = 7.8, 1.8 Hz, 1 H), 7.51–7.45 (m, 1 H), 7.28 (d, *J* = 8.0 Hz, 2 H), 6.98 (t, *J* = 7.1 Hz, 1 H), 6.89 (d, *J* = 8.4 Hz, 1 H), 4.92 (s, 2 H), 3.86 (s, 3 H), 2.41 (s, 3 H); <sup>13</sup>C NMR (125 MHz, CDCl<sub>3</sub>) δ 189.2, 159.0, 144.8, 136.7, 135.2, 131.2, 129.5, 128.5, 126.3, 120.9, 111.7, 67.5, 55.7, 21.6.

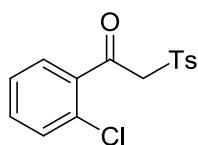

**1-(2-chlorophenyl)-2-tosylethanone (3ta):**<sup>8</sup> faint yellow solid (isolated yield: 89%); m.p. 95–96 °C; <sup>1</sup>H NMR (500 MHz, CDCl<sub>3</sub>) δ 7.76 (d, *J* = 8.2 Hz, 2 H), 7.55 (dd, *J* = 7.7, 1.4 Hz, 1 H), 7.46–7.40 (m, 1 H), 7.39–7.28 (m, 4 H), 4.81 (s, 2 H), 2.44 (s, 3 H); <sup>13</sup>C NMR (125 MHz, CDCl<sub>3</sub>) δ 190.3, 145.4, 137.3, 136.0, 133.1, 131.6, 130.7, 130.6, 129.9, 128.6, 127.2, 66.4, 21.7.

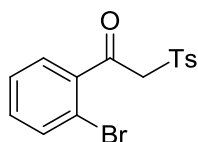

**1-(2-bromophenyl)-2-tosylethanone (3ua):**<sup>9</sup> white solid (isolated yield: 87%); m.p. 104–105 °C; <sup>1</sup>H NMR (500 MHz, CDCl<sub>3</sub>) δ 7.77 (d, *J* = 8.3 Hz, 2 H), 7.57 (dd, *J* = 7.9, 1.1 Hz, 1 H), 7.51 (dd, *J* = 7.6, 1.8 Hz, 1 H), 7.39 (td, *J* = 7.5, 1.2 Hz, 1 H), 7.36–7.31 (m, 3 H), 4.80 (s, 2 H), 2.44 (s, 3 H); <sup>13</sup>C NMR (125 MHz, CDCl<sub>3</sub>) δ 191.0, 145.4, 139.5, 135.9, 133.9, 132.9, 130.4, 129.9, 128.6, 127.7, 119.4, 66.1, 21.7.

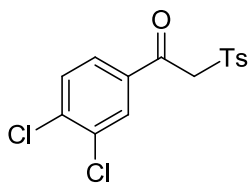

**1-(3,4-dichlorophenyl)-2-tosylethanone (3va):** white solid (isolated yield: 77%); m.p. 168–170 °C;  $^1\text{H NMR}$  (500 MHz, DMSO)  $\delta$  8.13 (d,  $J = 1.8$  Hz, 1 H), 7.88 (dd,  $J = 8.4$ , 1.9 Hz, 1 H), 7.82–7.72 (m, 3 H), 7.42 (d,  $J = 8.1$  Hz, 2 H), 5.32 (s, 2 H), 2.40 (s, 3 H).  $^{13}\text{C NMR}$  (125 MHz,  $d^6$ -DMSO)  $\delta$  187.4, 144.8, 137.0, 136.3, 135.8, 131.8, 131.0, 131.0, 129.6, 128.7, 128.1, 62.6, 21.0; HRMS (ESI): calcd for  $\text{C}_{15}\text{H}_{12}\text{Cl}_2\text{NaO}_3\text{S}^+$  ( $[\text{M} + \text{Na}]^+$ ) 364.9776, found 364.9803.

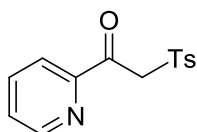

**1-(pyridin-2-yl)-2-tosylethanone (3wa):**<sup>6</sup> brown solid (isolated yield: 86%); m.p. 86–87 °C;  $^1\text{H NMR}$  (500 MHz,  $\text{CDCl}_3$ )  $\delta$  8.59 (d,  $J = 4.7$  Hz, 1 H), 8.00 (d,  $J = 7.8$  Hz, 1 H), 7.85–7.77 (m, 3 H), 7.50–7.45 (m, 1 H), 7.30 (d,  $J = 8.0$  Hz, 2 H), 5.14 (s, 2 H), 2.42 (s, 3 H);  $^{13}\text{C NMR}$  (125 MHz,  $\text{CDCl}_3$ )  $\delta$  189.8, 151.9, 149.1, 144.9, 137.1, 136.7, 129.6, 128.6, 127.9, 122.5, 61.1, 21.6.

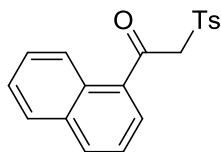

**1-(naphthalen-1-yl)-2-tosylethanone (3xa):**<sup>6</sup> faint yellow solid (isolated yield: 94%); m.p. 103–104 °C;  $^1\text{H NMR}$  (500 MHz,  $\text{CDCl}_3$ )  $\delta$  8.55 (d,  $J = 8.6$  Hz, 1 H), 8.03–7.96 (m, 2 H), 7.85 (d,  $J = 7.9$  Hz, 1 H), 7.71 (d,  $J = 8.3$  Hz, 2 H), 7.60–7.44 (m, 3 H), 7.24 (d,  $J = 8.0$  Hz, 2 H), 4.83 (s, 2 H), 2.39 (s, 3 H);  $^{13}\text{C NMR}$  (125 MHz,  $d^6$ -DMSO)  $\delta$  191.7, 144.5, 136.6, 133.9, 133.4, 133.3, 130.9, 129.6, 129.5, 128.6, 128.3, 127.9, 126.6, 124.9, 124.5, 65.3, 21.0.

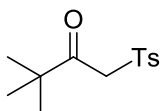

**3,3-dimethyl-1-tosylbutan-2-one (3ya):**<sup>10</sup> white solid (isolated yield: 88%); m.p. 110–111 °C;  $^1\text{H NMR}$  (500 MHz,  $\text{CDCl}_3$ )  $\delta$  7.82 (d,  $J = 8.3$  Hz, 2 H), 7.36 (d,  $J = 8.0$  Hz, 2 H), 4.31 (s, 2 H), 2.45 (s, 3 H), 1.12 (s, 9 H);  $^{13}\text{C NMR}$  (125 MHz,  $d^6$ -DMSO)  $\delta$  204.0, 144.1, 137.3, 129.4, 128.0, 60.3, 44.6, 25.0, 21.0.

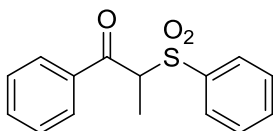



**1-phenyl-2-(phenylsulfonyl)propan-1-one (3bb)**, Entry 1, Table 3):<sup>11</sup> white solid (isolated yield: 85%); m.p. 75–76 °C; <sup>1</sup>H NMR (500 MHz, CDCl<sub>3</sub>) δ 7.97 (d, *J* = 7.2 Hz, 2 H), 7.79 (d, *J* = 7.2 Hz, 2 H), 7.68–7.57 (m, 2 H), 7.55–7.43 (m, 4 H), 5.18 (q, *J* = 6.9 Hz, 1 H), 1.57 (d, *J* = 6.9 Hz, 3 H); <sup>13</sup>C NMR (125 MHz, CDCl<sub>3</sub>) δ 192.5, 136.2, 136.1, 134.2, 134.1, 129.8, 129.1, 128.9, 128.8, 65.0, 13.2.

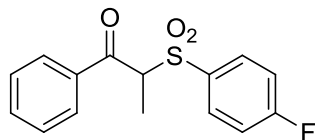

**2-(4-fluorophenylsulfonyl)-1-phenylpropan-1-one (3bc)**, white solid (isolated yield: 77%); m.p. 103–104 °C; <sup>1</sup>H NMR (500 MHz, CDCl<sub>3</sub>) δ 7.97 (d, *J* = 7.3 Hz, 2 H), 7.80 (dd, *J* = 8.9, 5.1 Hz, 2 H), 7.62 (t, *J* = 7.4 Hz, 1 H), 7.49 (t, *J* = 7.8 Hz, 2 H), 7.19 (t, *J* = 8.5 Hz, 2 H), 5.18 (q, *J* = 6.9 Hz, 1 H), 1.57 (d, *J* = 6.9 Hz, 3 H); <sup>13</sup>C NMR (125 MHz, CDCl<sub>3</sub>) δ 192.6, 166.1 (d, *J* = 256.3 Hz), 13.6.1, 134.2, 132.8 (d, *J* = 10.0 Hz), 132.0 (d, *J* = 2.5 Hz), 129.2, 128.9, 116.3 (d, *J* = 22.5 Hz), 65.0, 13.3; HRMS (ESI): calcd for C<sub>15</sub>H<sub>14</sub>FO<sub>3</sub>S<sup>+</sup> ([M + H]<sup>+</sup>) 293.0642, found 293.0644.

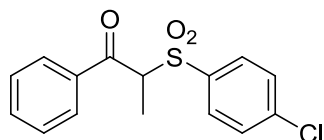

**2-(4-chlorophenylsulfonyl)-1-phenylpropan-1-one (3bd)**:<sup>12</sup> white solid (isolated yield: 87%); m.p. 117–118 °C; <sup>1</sup>H NMR (500 MHz, CDCl<sub>3</sub>) δ 7.97 (d, *J* = 7.3 Hz, 2 H), 7.72 (d, *J* = 8.6 Hz, 2 H), 7.62 (t, *J* = 7.4 Hz, 1 H), 7.53–7.45 (m, 4 H), 5.18 (q, *J* = 6.9 Hz, 1 H), 1.57 (d, *J* = 6.9 Hz, 3 H); <sup>13</sup>C NMR (125 MHz, CDCl<sub>3</sub>) δ 192.5, 141.2, 136.0, 134.4, 134.3, 131.3, 129.2, 129.2, 128.9, 65.1, 13.3.

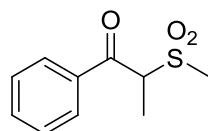

**2-(methylsulfonyl)-1-phenylpropan-1-one (3be)**:<sup>13</sup> white solid (isolated yield: 92%); m.p. 55–56 °C; <sup>1</sup>H NMR (500 MHz, CDCl<sub>3</sub>) δ 8.03 (dd, *J* = 8.4, 1.1 Hz, 2 H), 7.65 (t, *J* = 7.4 Hz, 1 H), 7.52 (t, *J* = 7.8 Hz, 2 H), 4.97 (q, *J* = 7.1 Hz, 1 H), 2.98 (d, *J* = 0.6 Hz, 3 H), 1.74 (d, *J* = 7.1 Hz, 3 H); <sup>13</sup>C NMR (125 MHz, CDCl<sub>3</sub>) δ 194.0, 135.7, 134.5, 129.2, 129.0, 64.0, 37.0, 13.9.

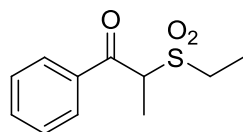

**2-(ethylsulfonyl)-1-phenylpropan-1-one (3bf)**:<sup>14</sup> colorless liquid (isolated yield: 90%); <sup>1</sup>H NMR (500 MHz, CDCl<sub>3</sub>) δ 8.04 (dd, *J* = 8.3, 1.1 Hz, 2 H), 7.65 (t, *J* = 7.4 Hz,

1 H), 7.52 (t,  $J = 7.8$  Hz, 2 H), 5.02 (q,  $J = 7.1$  Hz, 1 H), 3.22–3.09 (m, 2 H), 1.74 (d,  $J = 7.1$  Hz, 3 H), 1.38 (t,  $J = 7.5$  Hz, 3 H).  $^{13}\text{C}$  NMR (125 MHz,  $\text{CDCl}_3$ )  $\delta$  193.8, 135.8, 134.4, 129.2, 129.0, 63.63, 43.7, 13.4, 5.1.

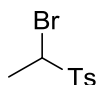

**1-(1-bromoethylsulfonyl)-4-methylbenzene 5:**<sup>15</sup> white solid (isolated yield: 82%);  $^1\text{H}$  NMR (500 MHz,  $\text{CDCl}_3$ )  $\delta$  7.85 (d,  $J = 8.1$  Hz, 2 H), 7.39 (d,  $J = 8.0$  Hz, 2 H), 4.85 (q,  $J = 6.9$  Hz, 1 H), 2.48 (s, 3 H), 1.96 (d,  $J = 6.9$  Hz, 3 H);  $^{13}\text{C}$  NMR (125 MHz,  $\text{CDCl}_3$ )  $\delta$  145.8, 131.6, 130.1, 129.8, 59.2, 21.7, 19.5.

## Reference

1. Zhang, G.; Xu, W.; Liu, J.; Das, D. K.; Yang, S.; Perveen, S.; Zhang, H.; Li, X.; Fang, X. *Chem. Commun.* **2017**, 53, 13336.
2. Chen, J.; Guo, W.; Wang, Z.; Hu, L.; Chen, F.; Xia, Y. *J. Org. Chem.* **2016**, 81, 5504.
3. Tang, X.; Huang, L.; Xu, Y.; Yang, J.; Wu, W.; Jiang, H. *Angew. Chem. Int. Ed.* **2014**, 53, 4205.
4. Jiang, H.; Cheng, Y.; Zhang, Y.; Yu, S. *Eur. J. Org. Chem.* **2013**, 5485.
5. Tang, Y.; Zhang, Y.; Wang, K.; Li, X.; Xu, X.; Du, X. *Org. Biomol. Chem.* **2015**, 13, 7084.
6. Kumar, A.; Muthyala, M. K. *Tetrahedron Lett.* **2011**, 52, 5368.
7. Handa, S.; Fennewald, J. C.; Lipshutz, B. H. *Angew. Chem. Int. Ed.* **2014**, 53, 3432.
8. Samakkanad, N.; Katrun, P.; Techajaronjit, T.; Hlekhilai, S.; Pohmakotr, M.; Reutrakul, V.; Jaipetch, T.; Soorukram, D.; Kuhakarn, C. *Synthesis* **2012**, 44, 1693.
9. Deng, S.; Liang, E.; Wu, Y.; Tang, X. *Tetrahedron Lett.* **2018**, 59, 3955.
10. a) Field, L.; Lawson, J. E.; McFarland, J. W. *J. Am. Chem. Soc.* **1956**, 78, 4389. b) Xie, L.; Zhen, X.; Huang, S.; Su, X.; Lin, M.; Li, Y. *Green Chem.* **2017**, 19, 3530.
11. Singh, A. K.; Chawla, R.; Keshari, T.; Yadav, V. K.; Yadav, L. D. S. *Org. Biomol. Chem.* **2014**, 12, 8550.
12. Aveniente, M.; Pinto, E. F.; Santos, L. S. *Bioorg. Med. Chem.* **2007**, 15, 7337.
13. Jiang, Y.; Loh, T.-P. *Chem. Sci.* **2014**, 5, 4939.
14. Katritzky, A. R.; Abdel-Fattah, A. A. A.; Wang, M. *J. Org. Chem.* **2003**, 68, 1443.
15. Rodríguez, N.; de Arellano, C. R.; Asensio, G.; Medio-Simón, M. *Chem. Eur. J.* **2007**, 13, 4223.

#### 4. Copy of NMR spectra

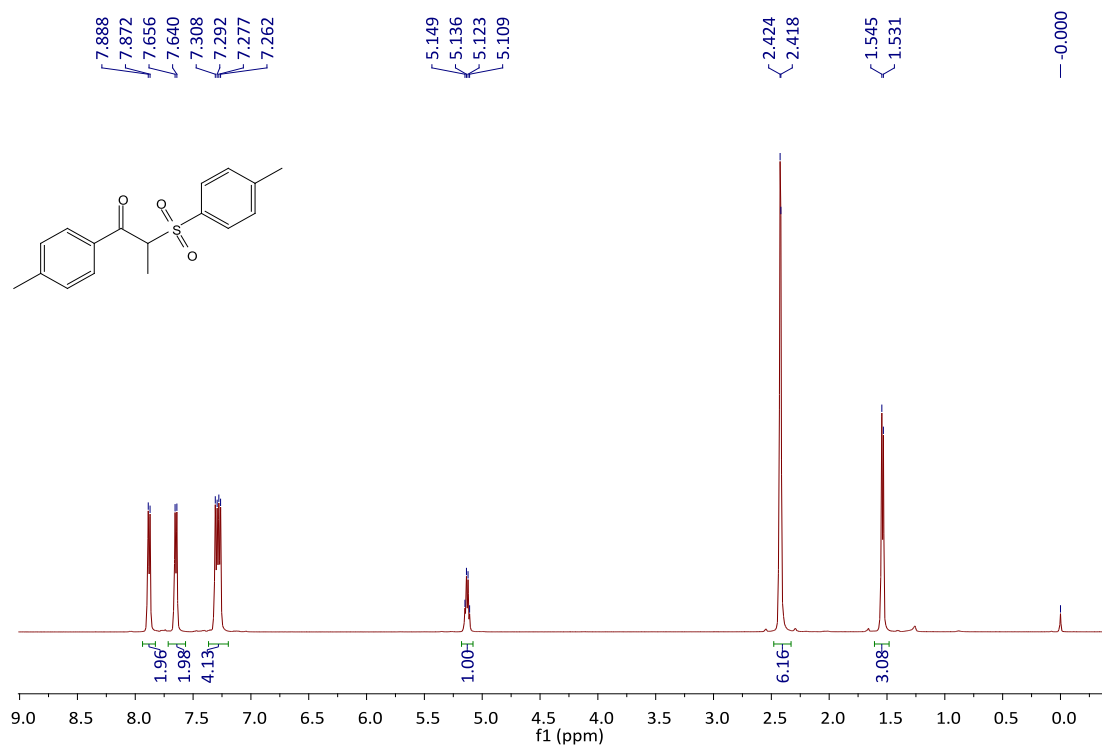

<sup>1</sup>H NMR (500 Hz, CDCl<sub>3</sub>): **3aa**

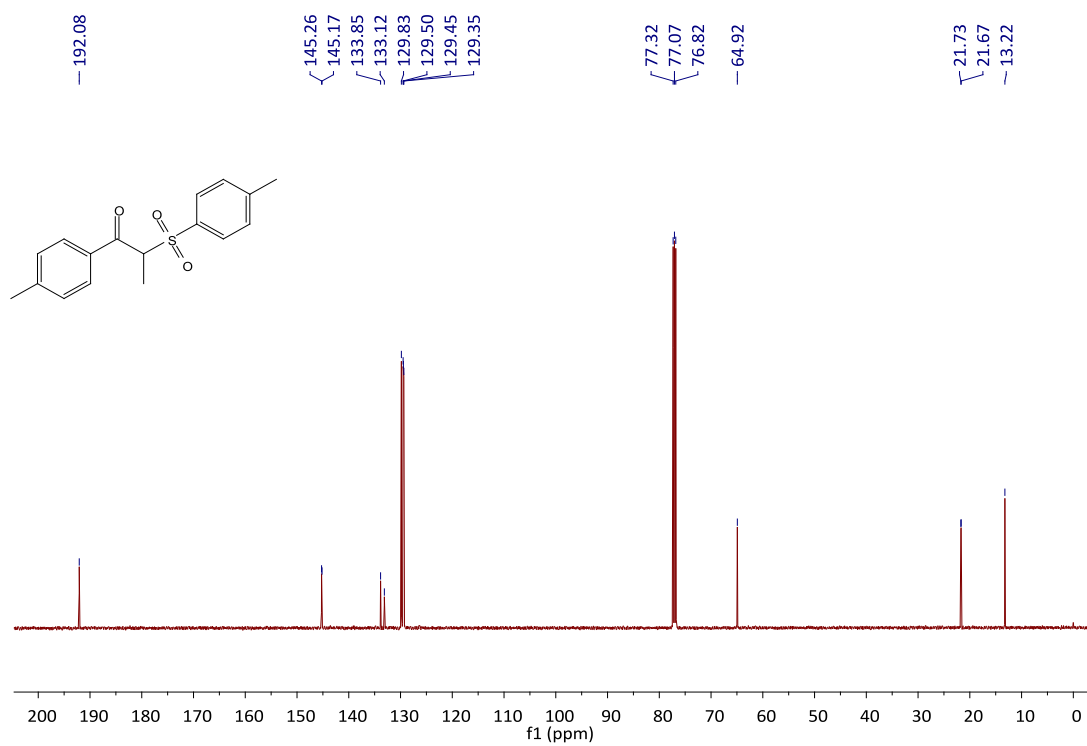

<sup>13</sup>C NMR (125 Hz, CDCl<sub>3</sub>): **3aa**

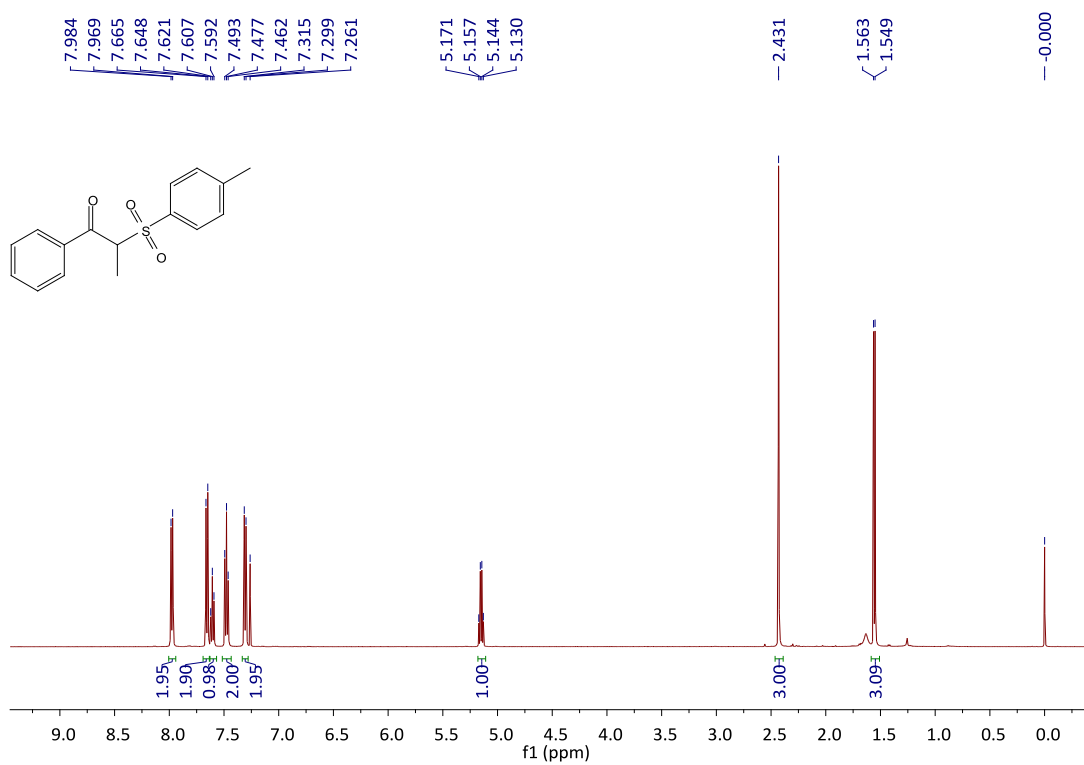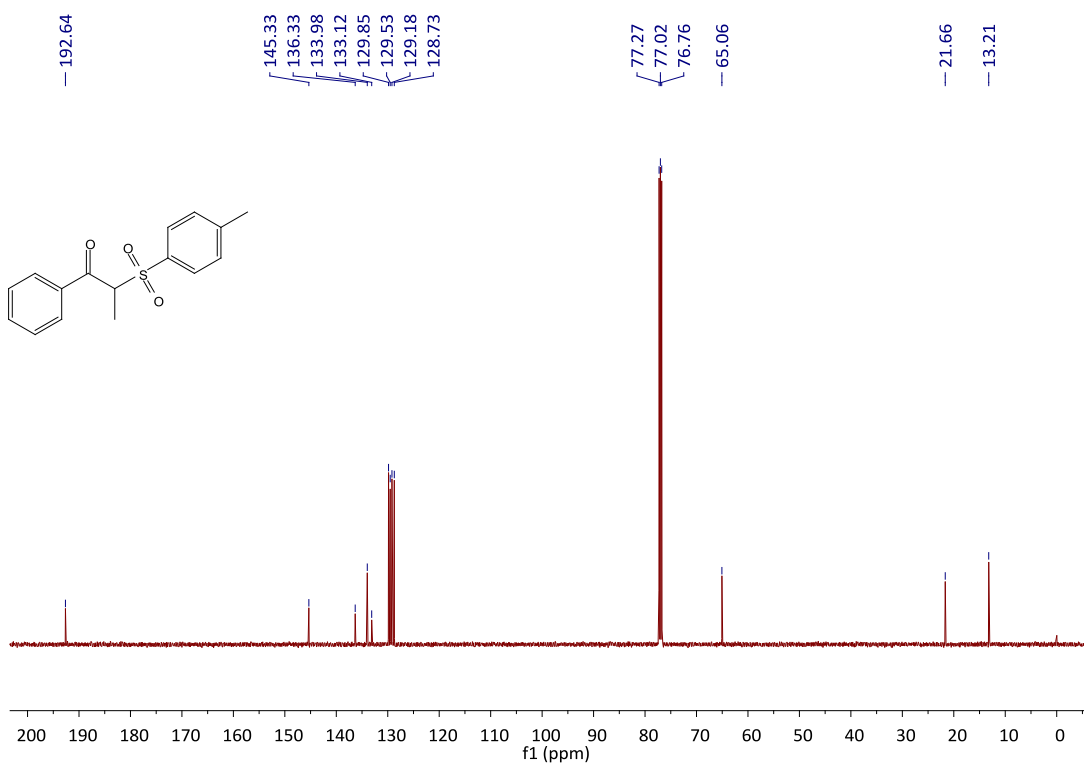

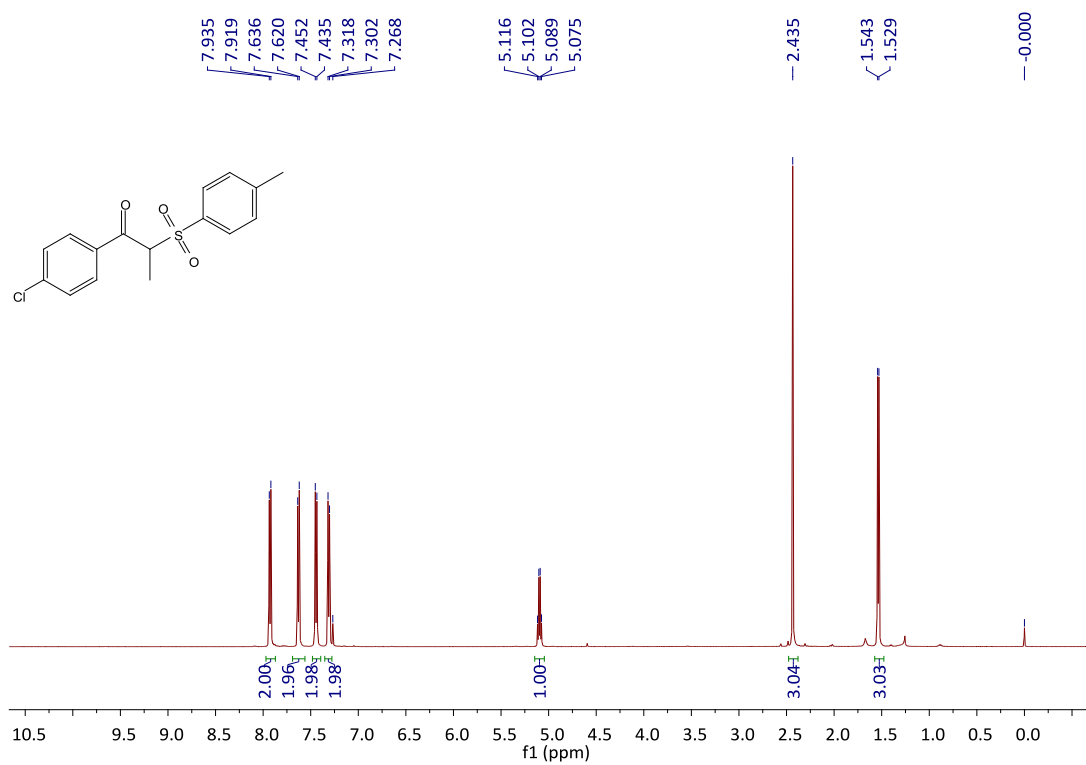

$^1\text{H}$  NMR (500 Hz,  $\text{CDCl}_3$ ): **3ca**

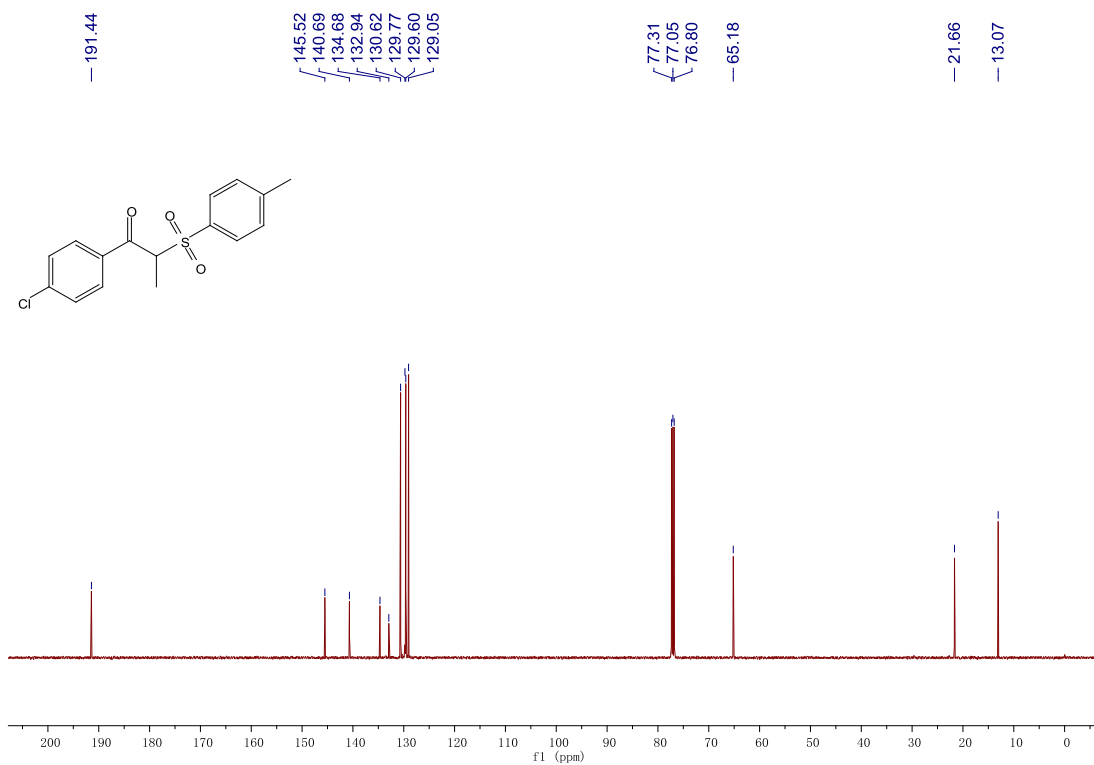

$^{13}\text{C}$  NMR (125 Hz,  $\text{CDCl}_3$ ): **3ca**

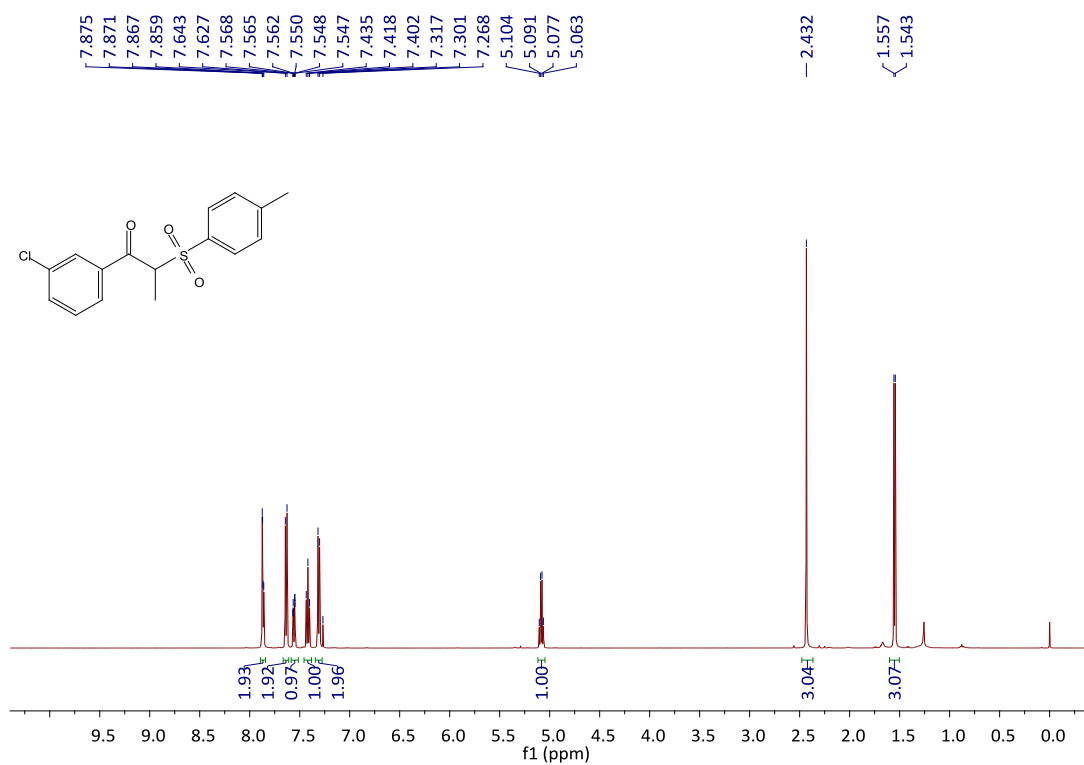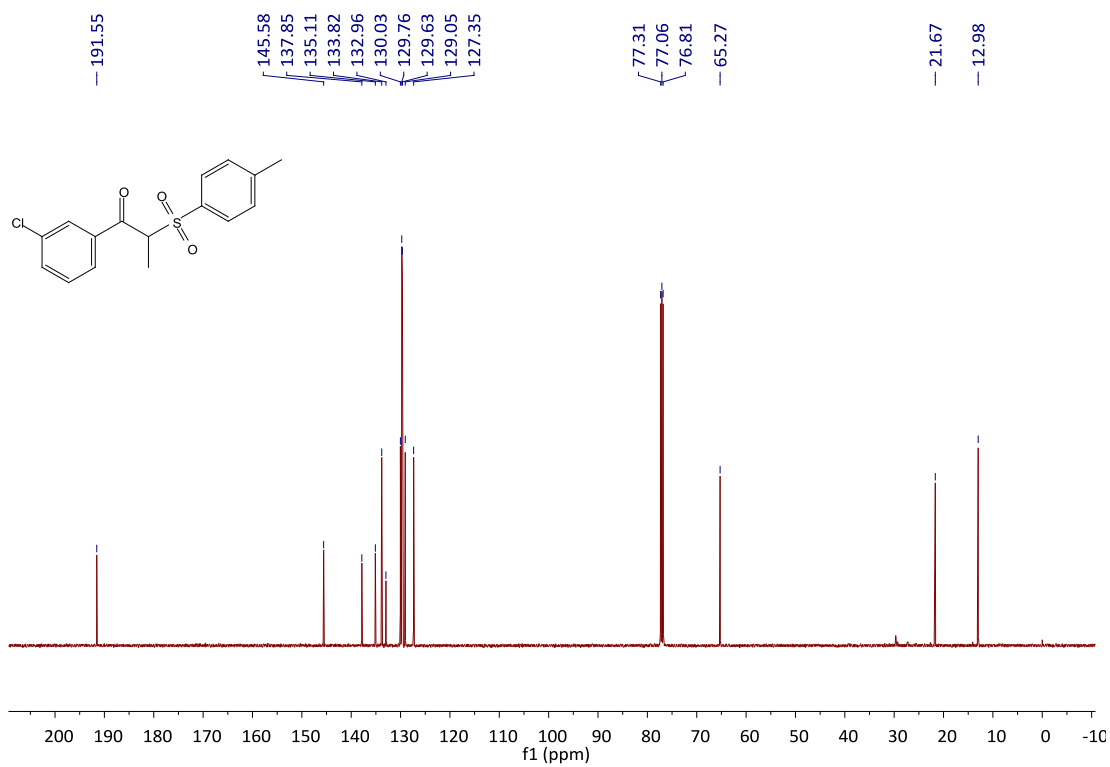

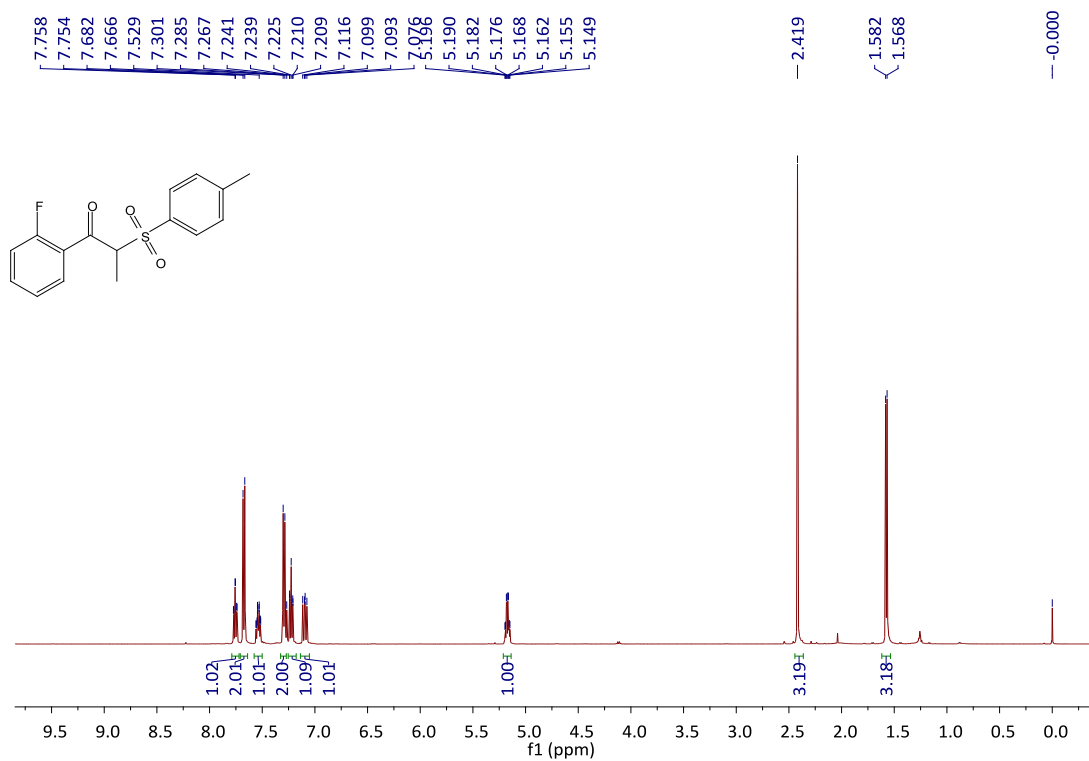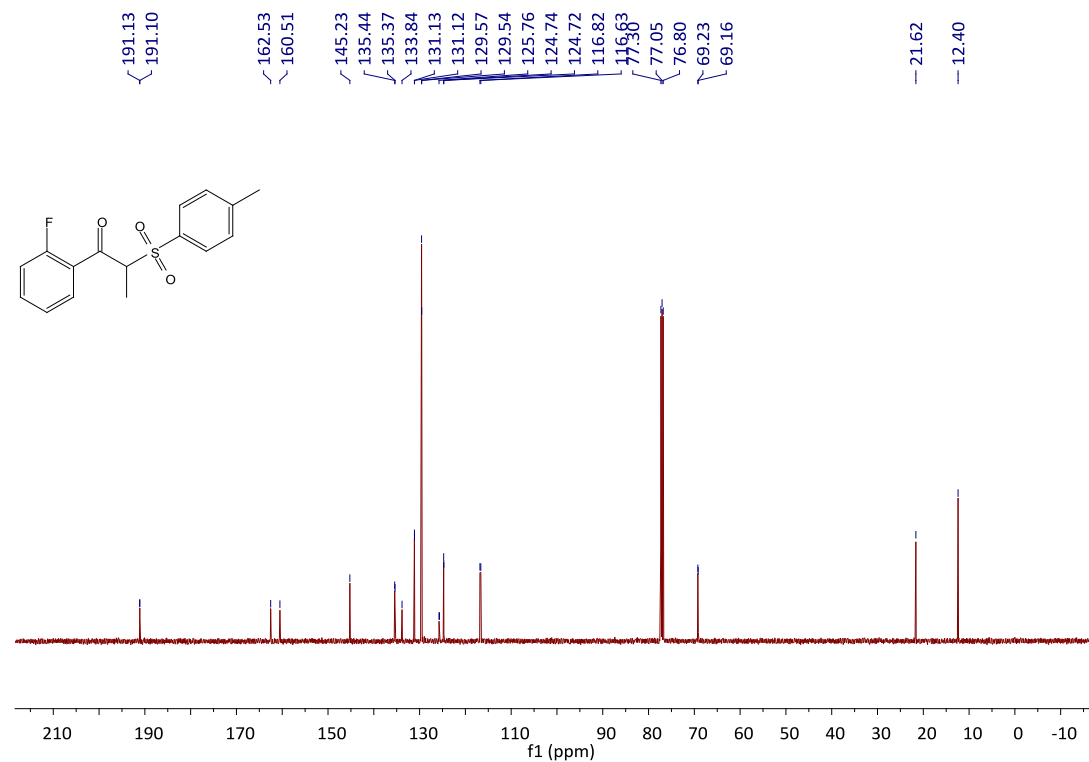

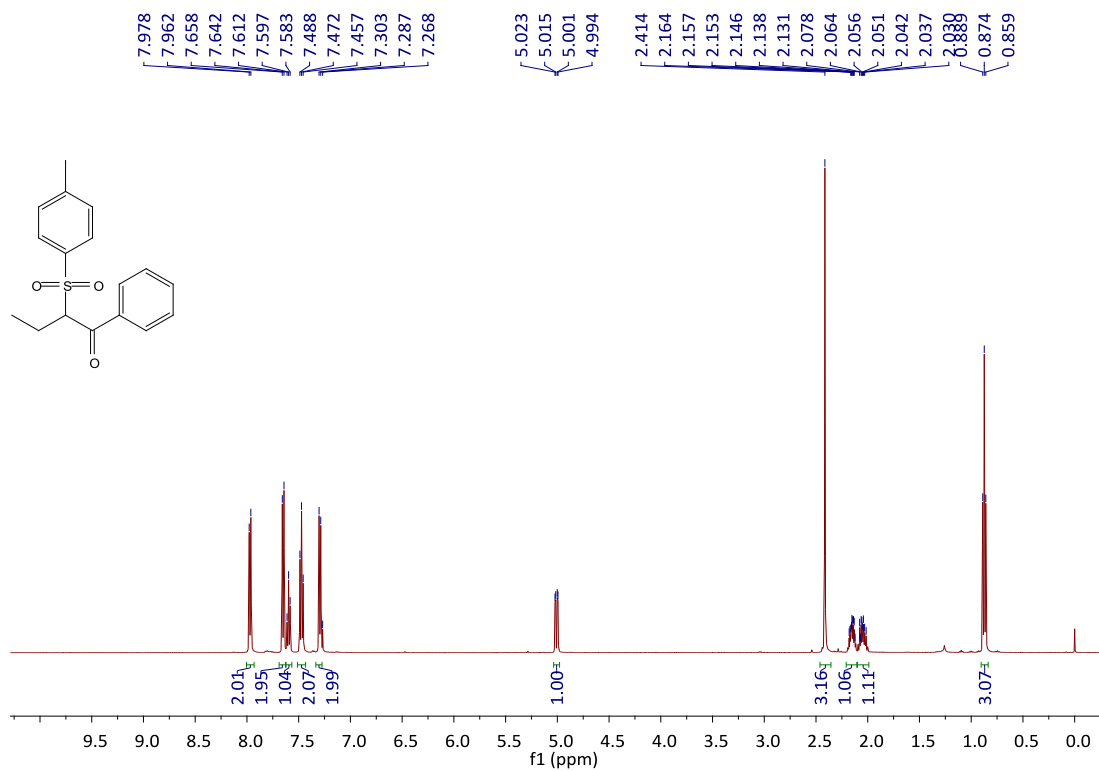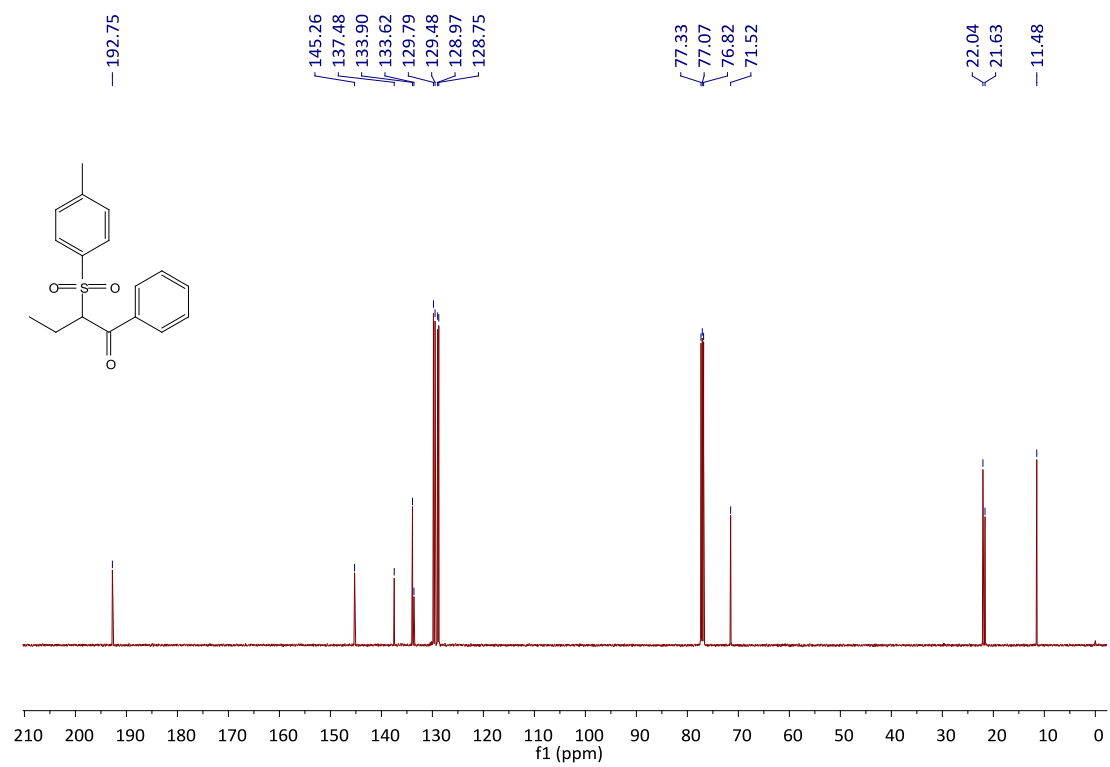



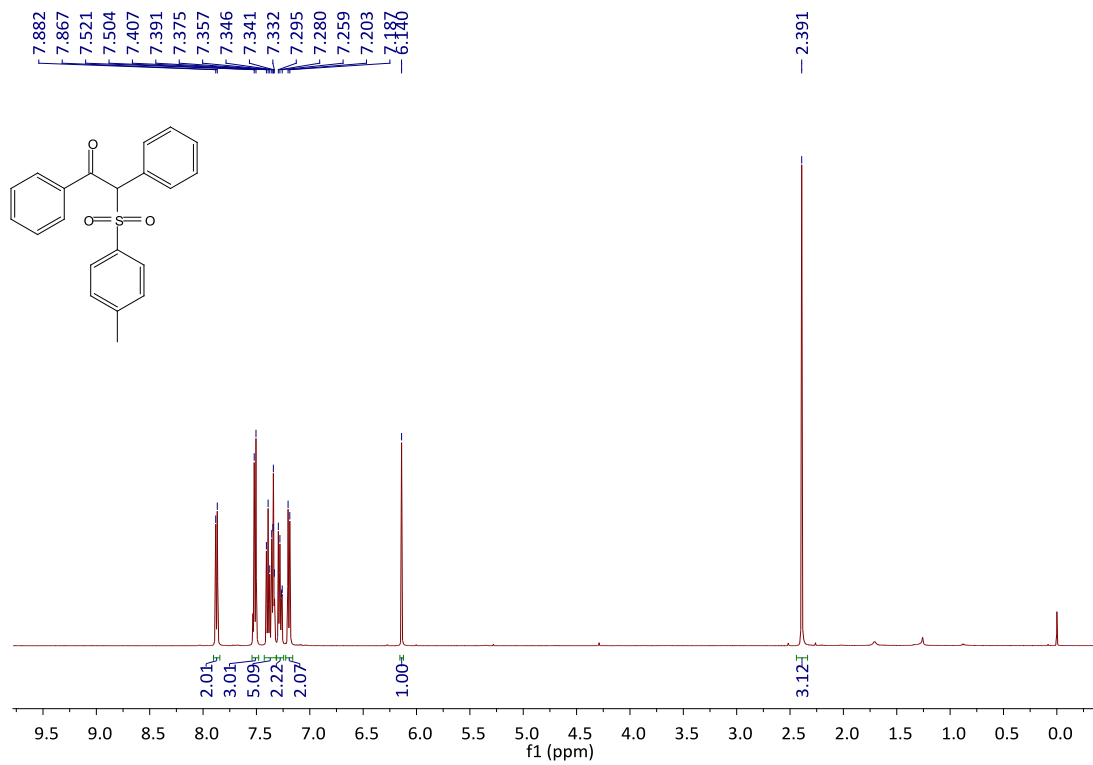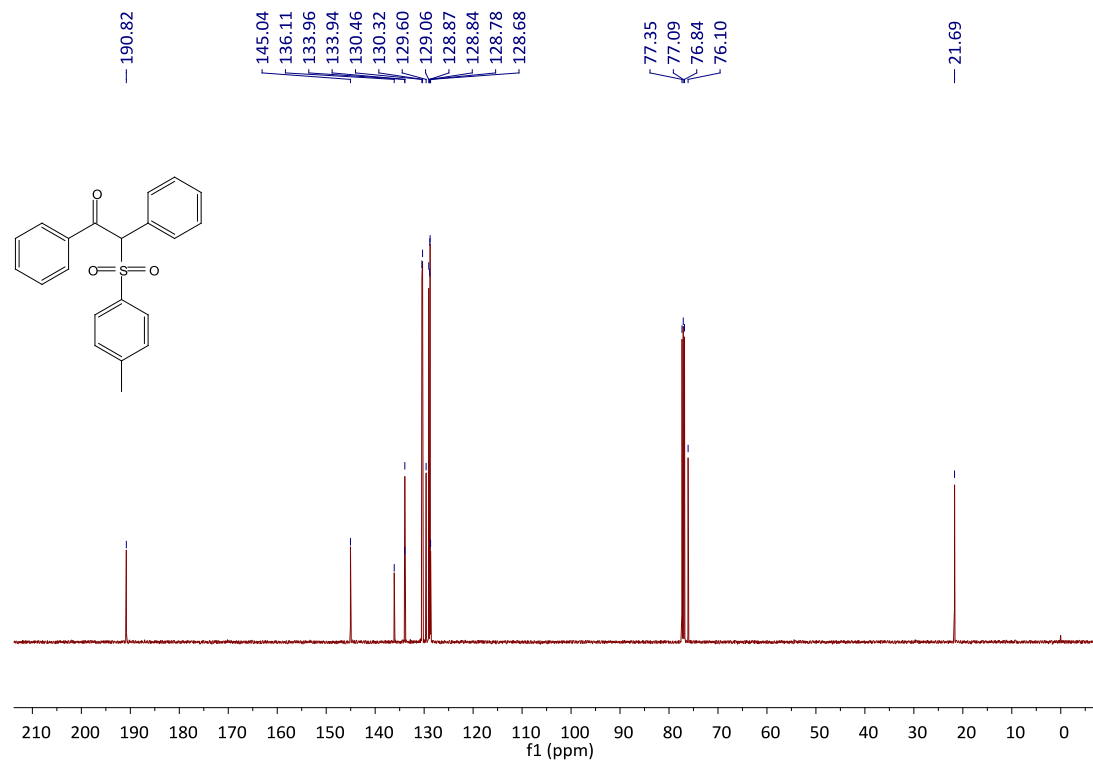

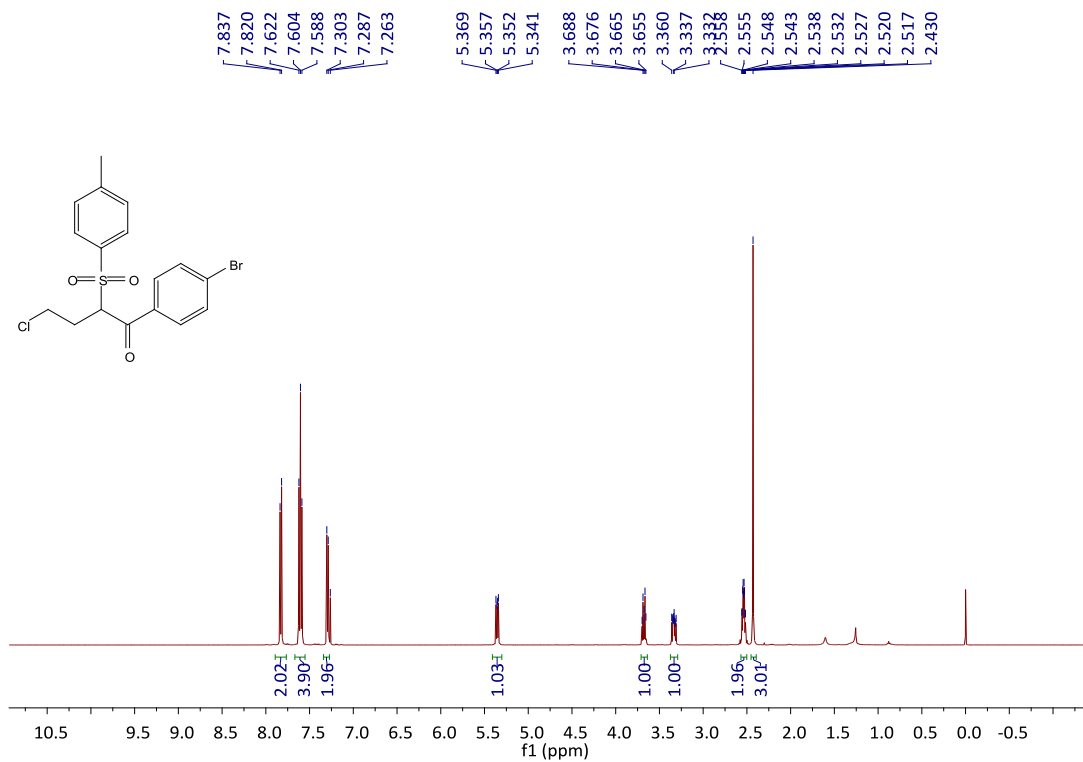

$^1\text{H}$  NMR (500 Hz,  $\text{CDCl}_3$ ): **3ha**

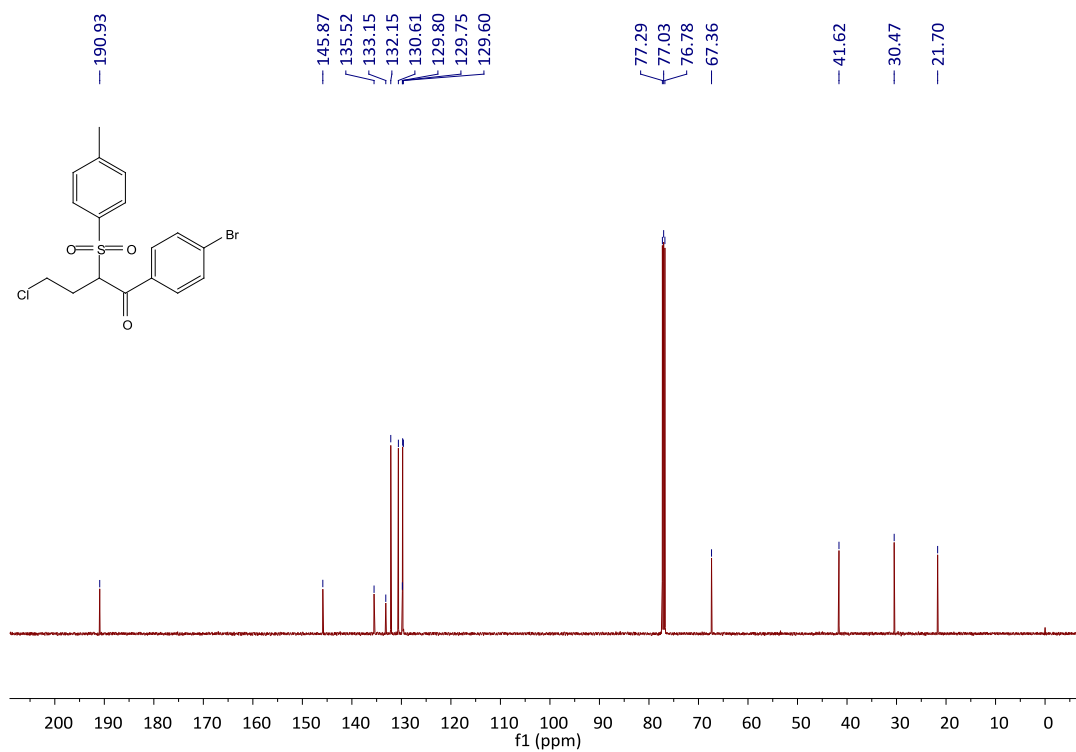

$^{13}\text{C}$  NMR (125 Hz,  $\text{CDCl}_3$ ): **3ha**

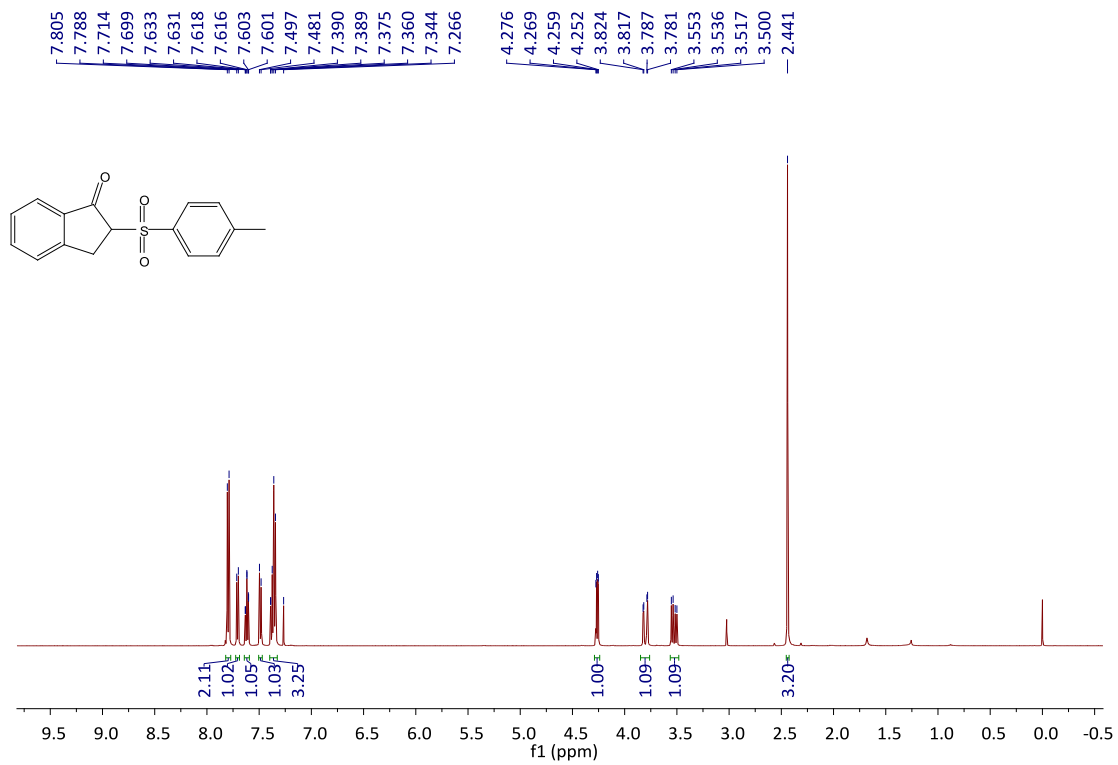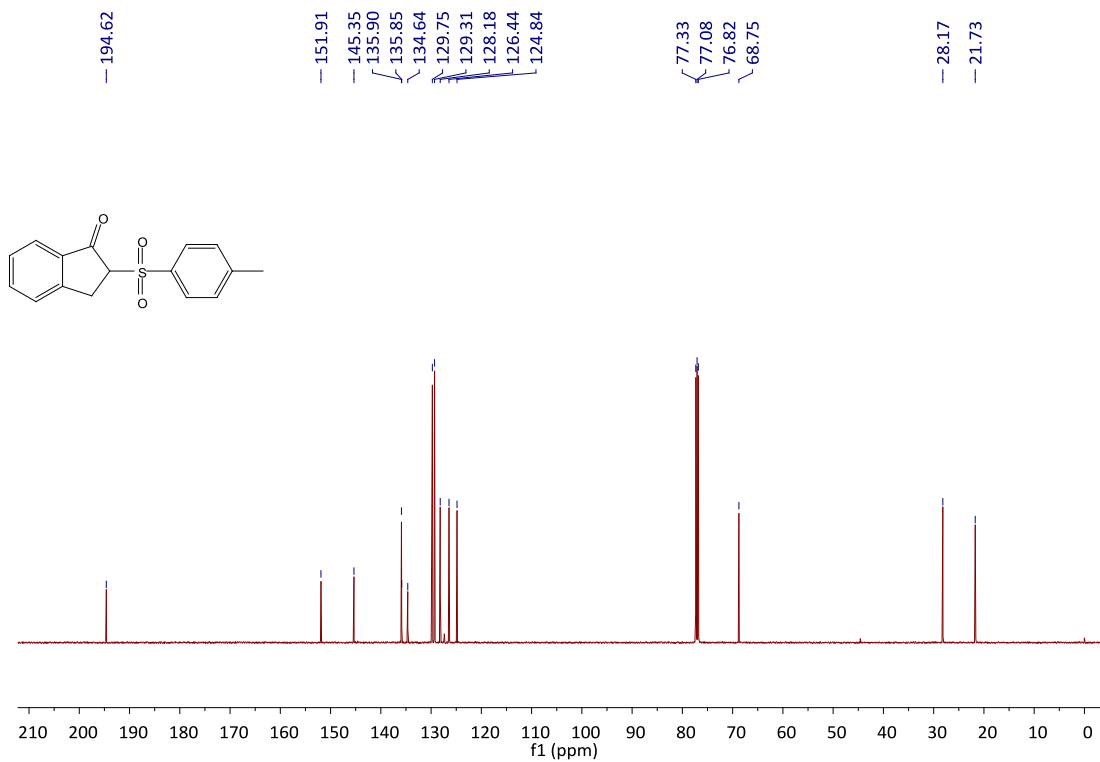

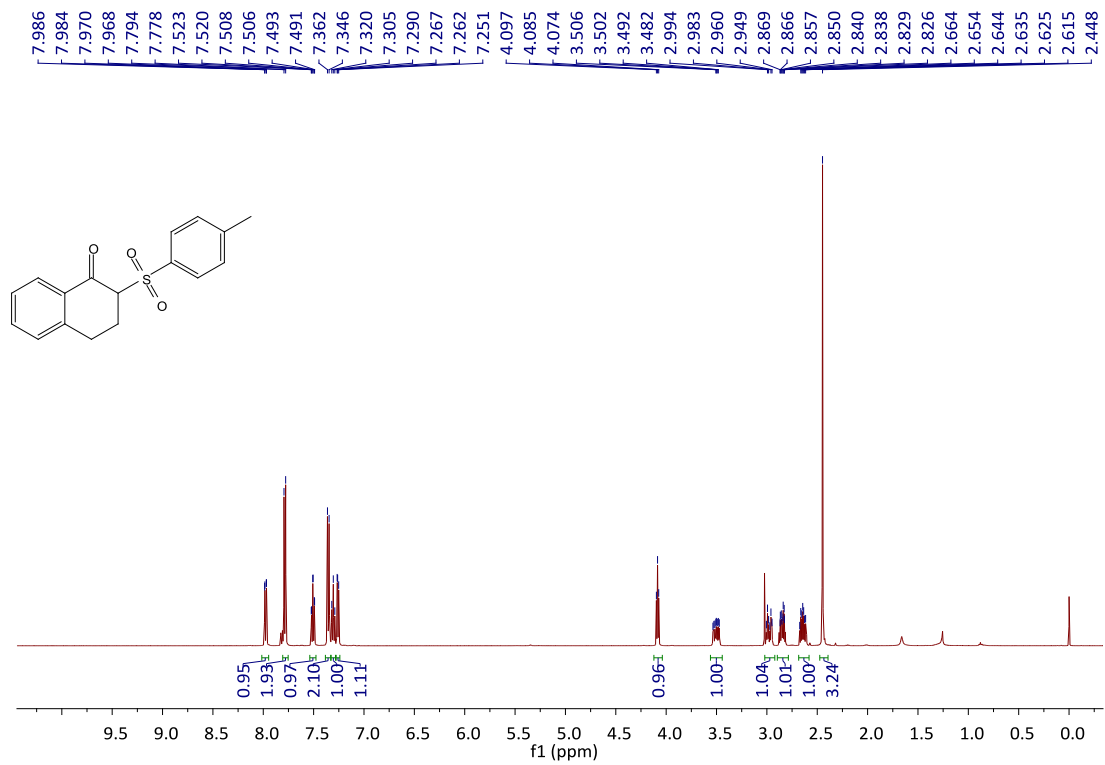

$^1\text{H}$  NMR (500 Hz,  $\text{CDCl}_3$ ): **3ja**

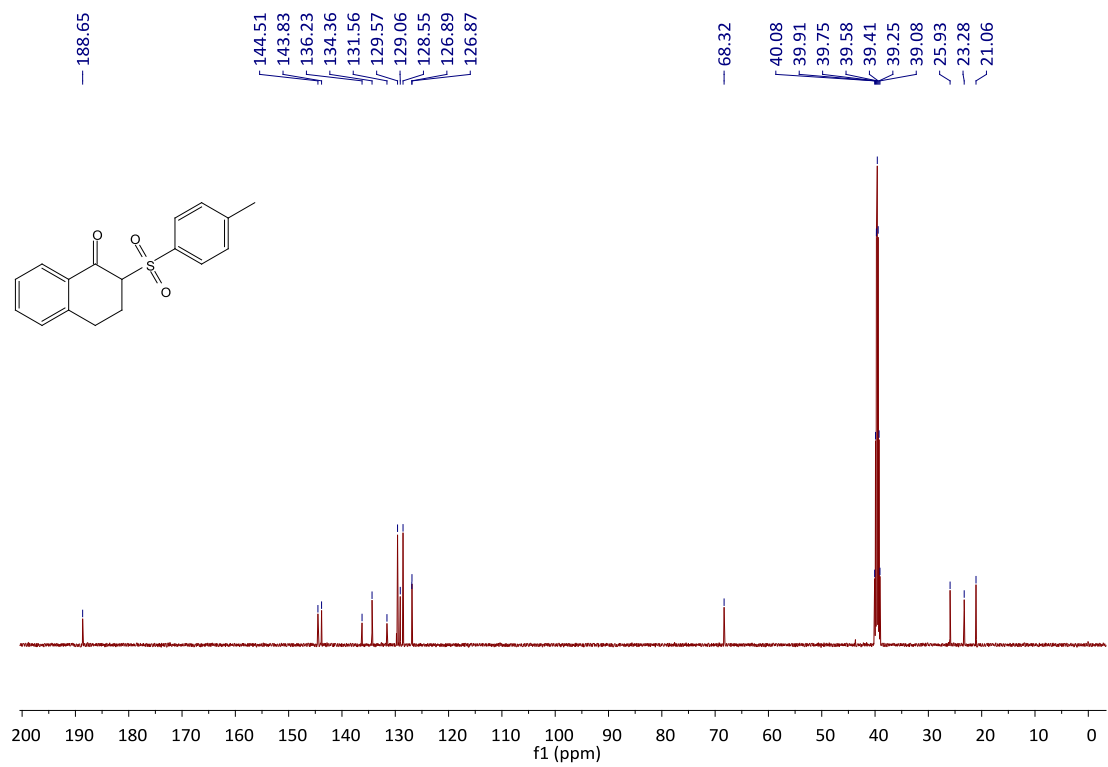

$^{13}\text{C}$  NMR (125 Hz, DMSO): **3ja**

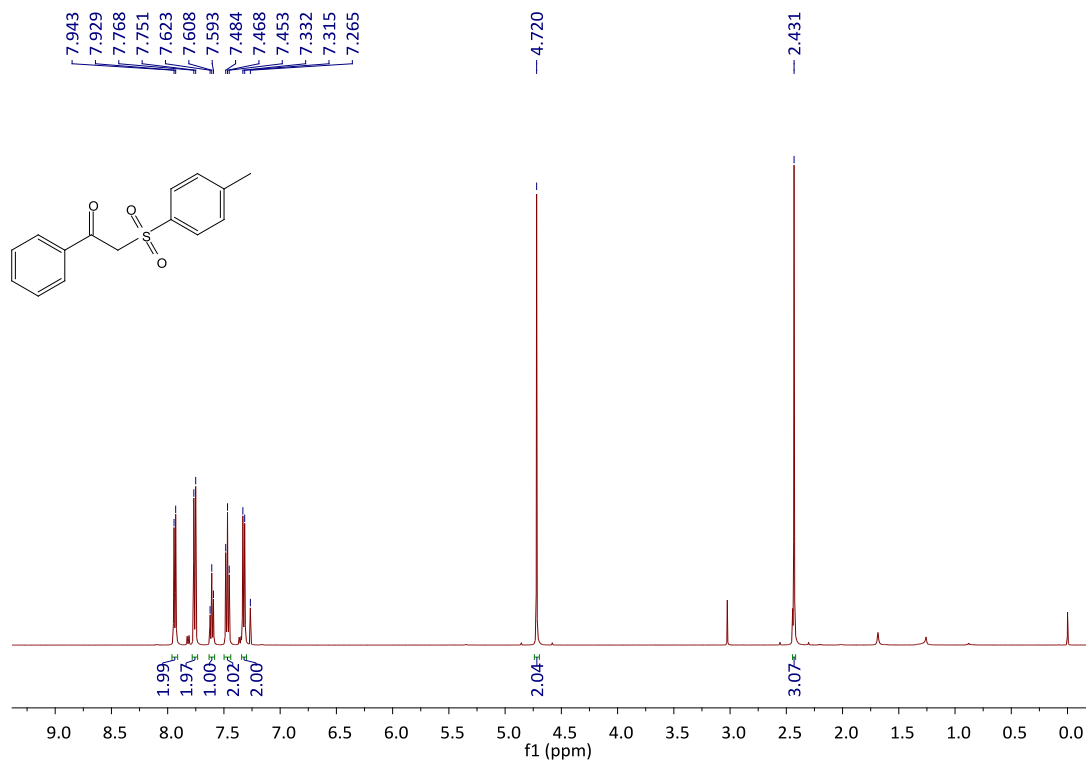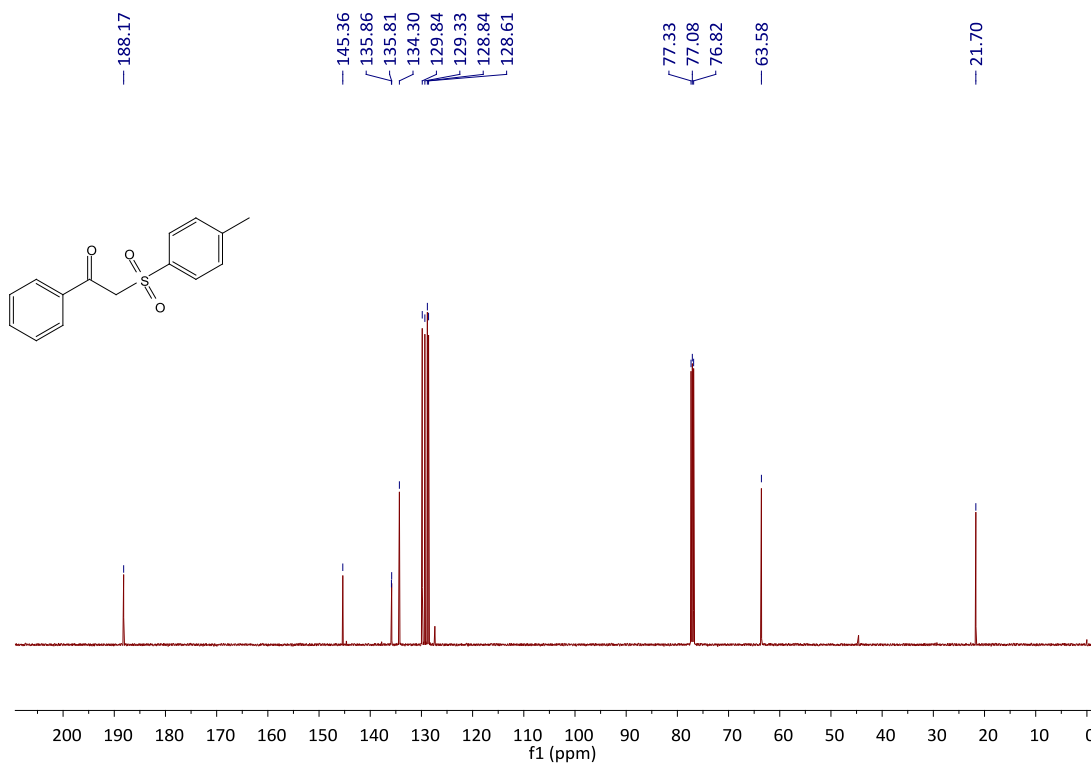

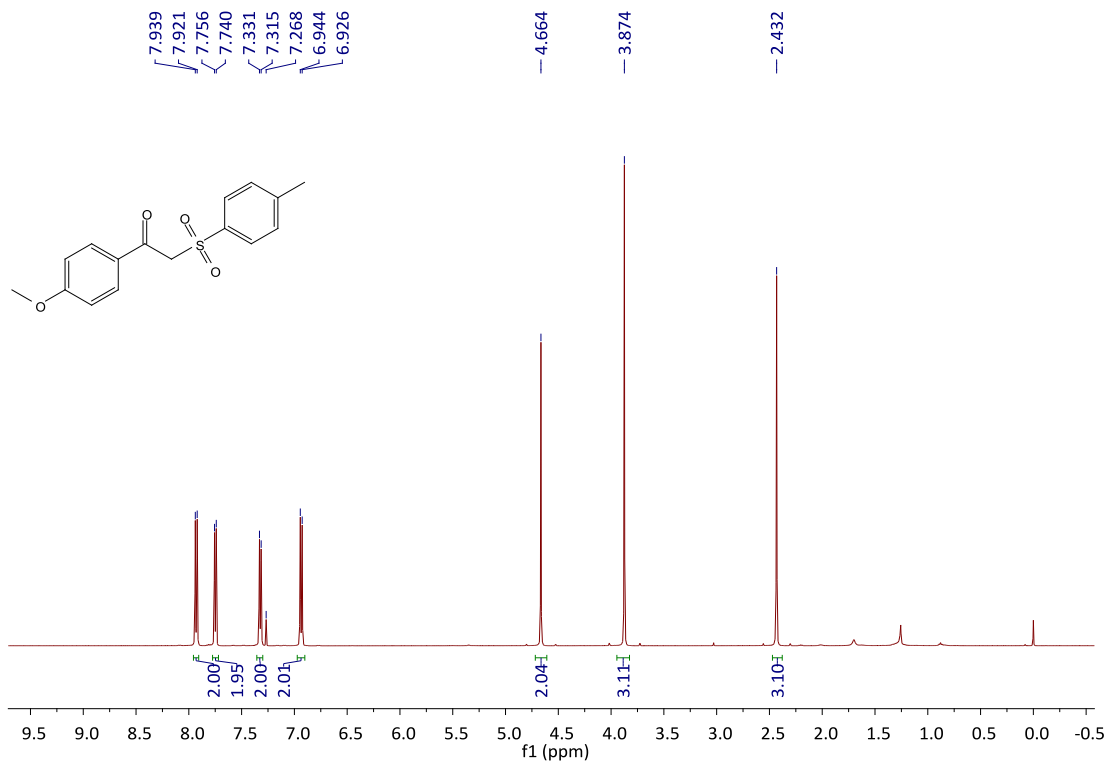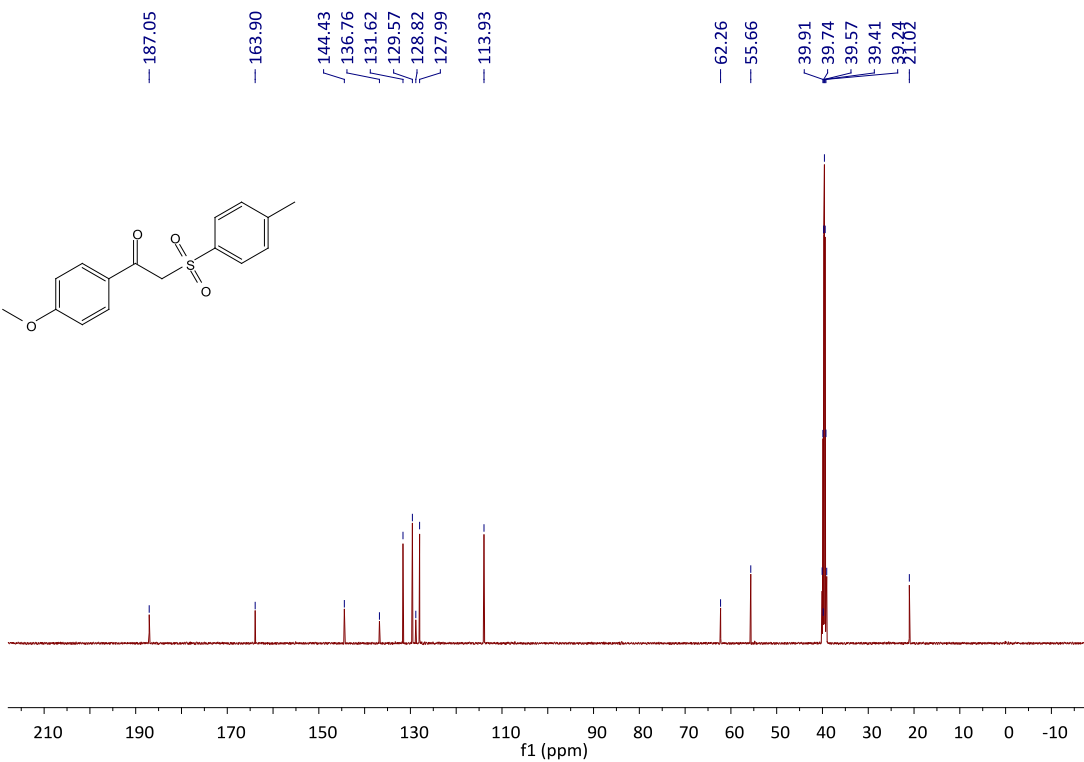

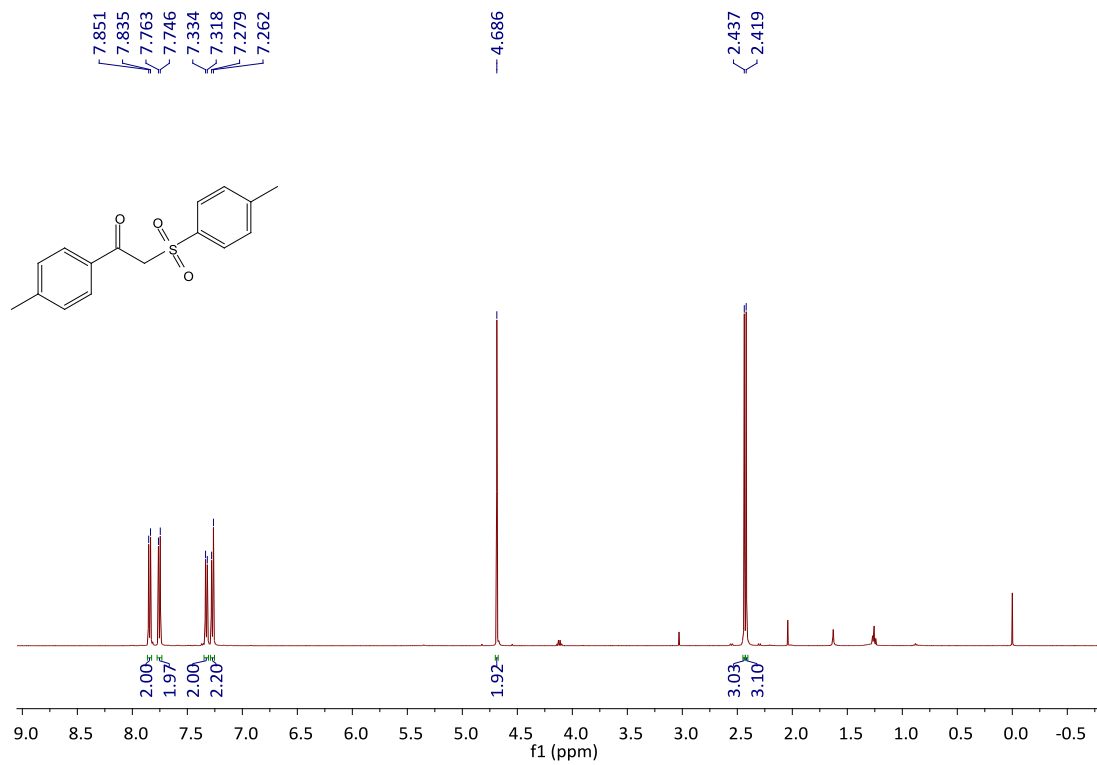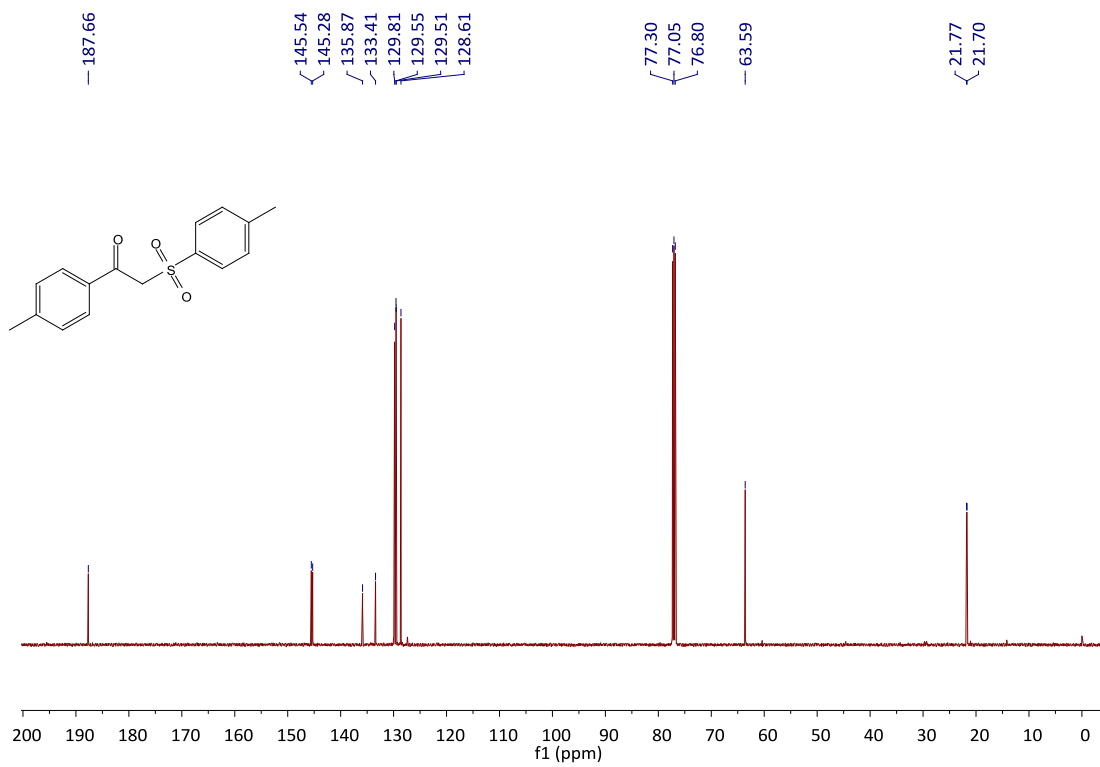

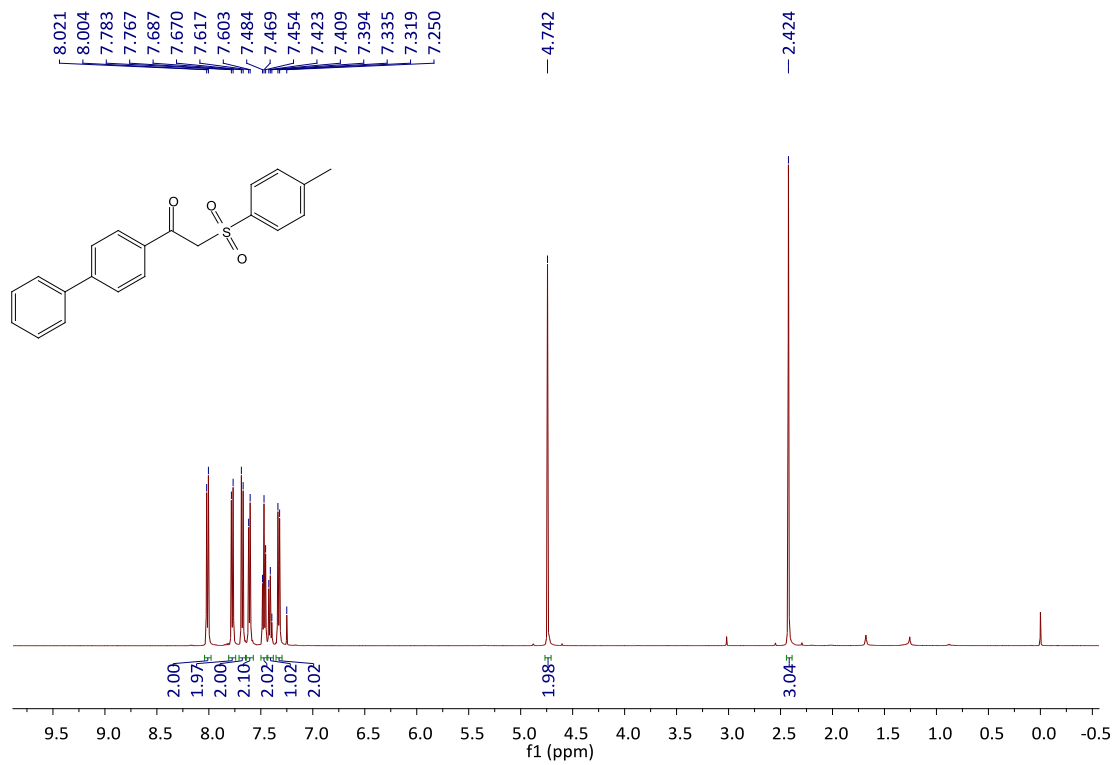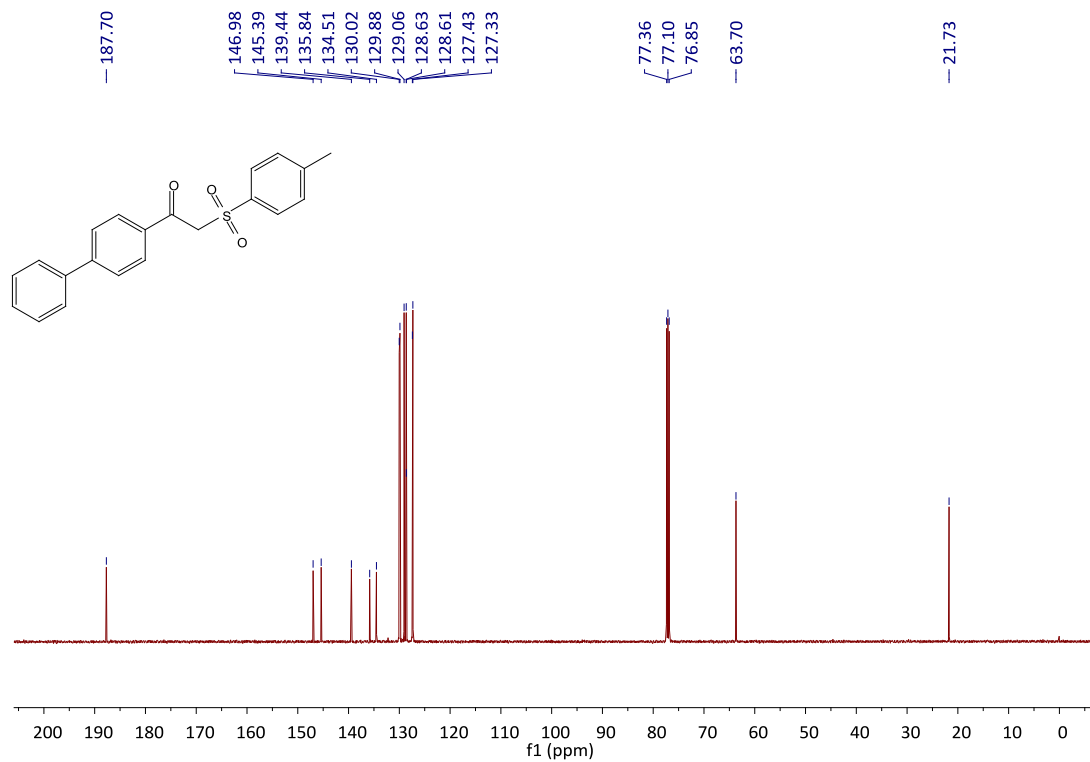



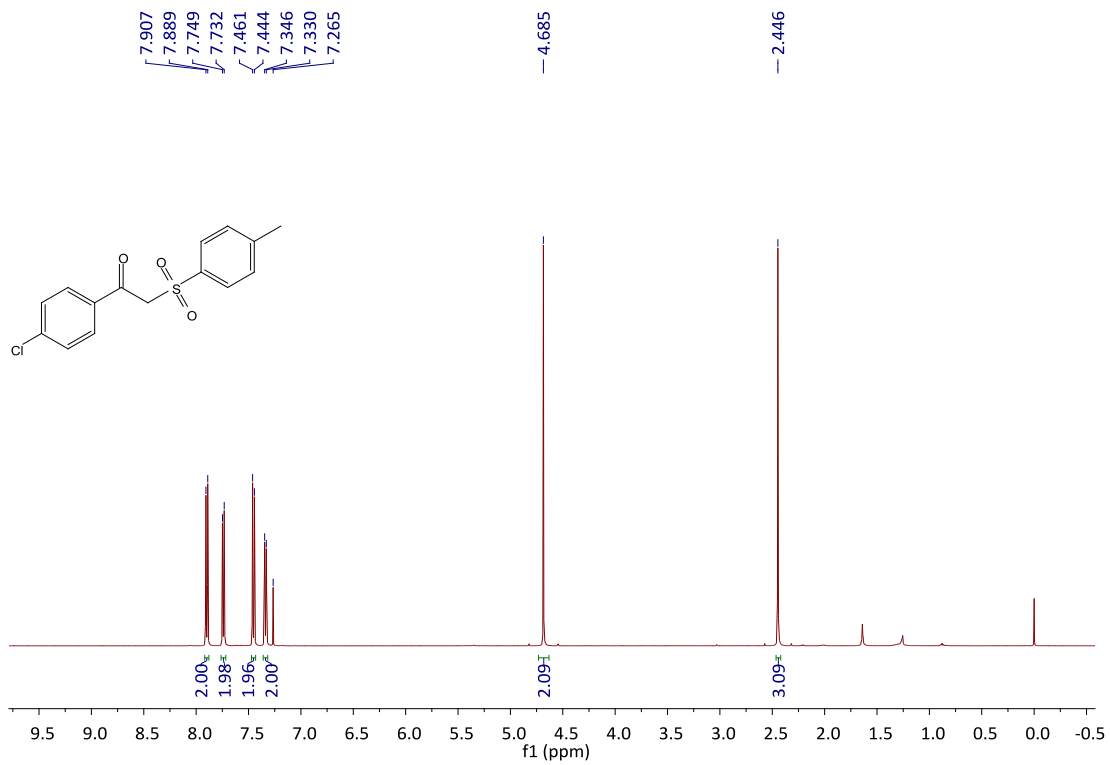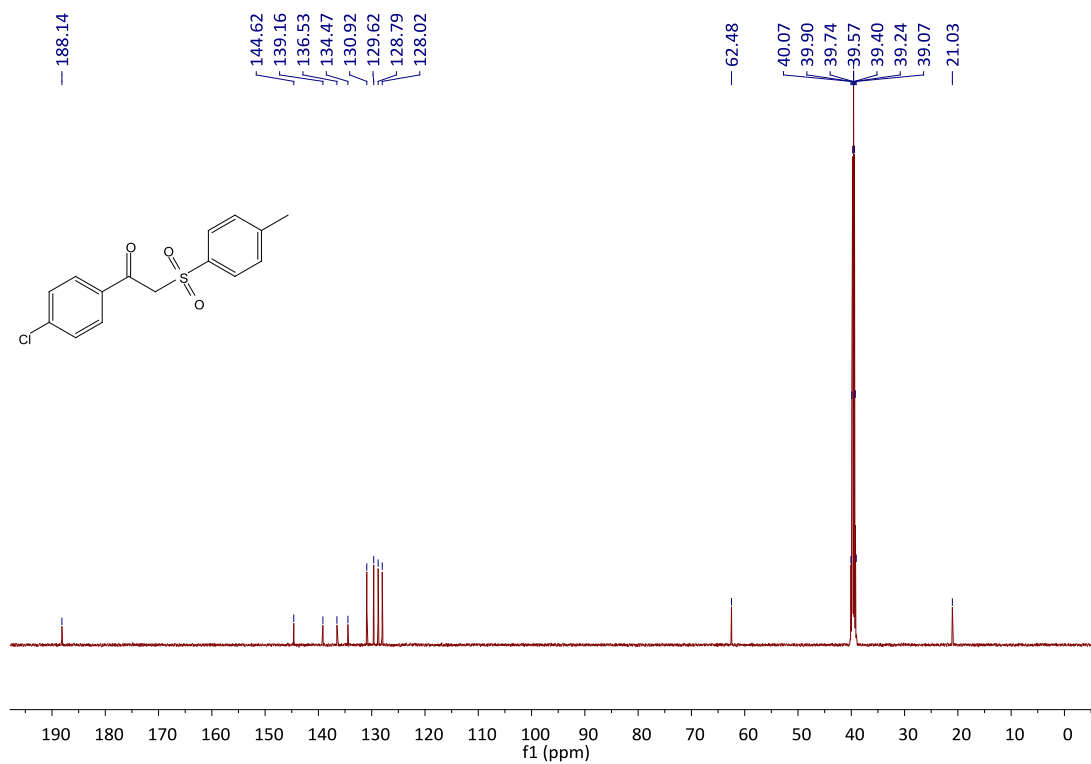

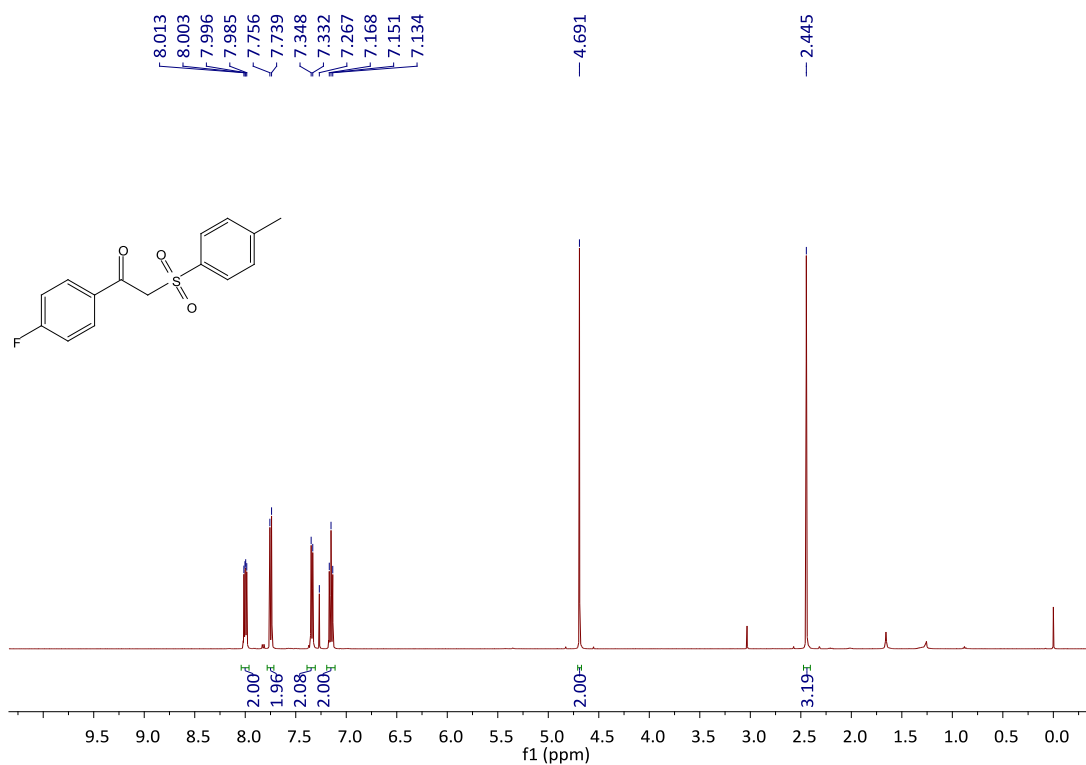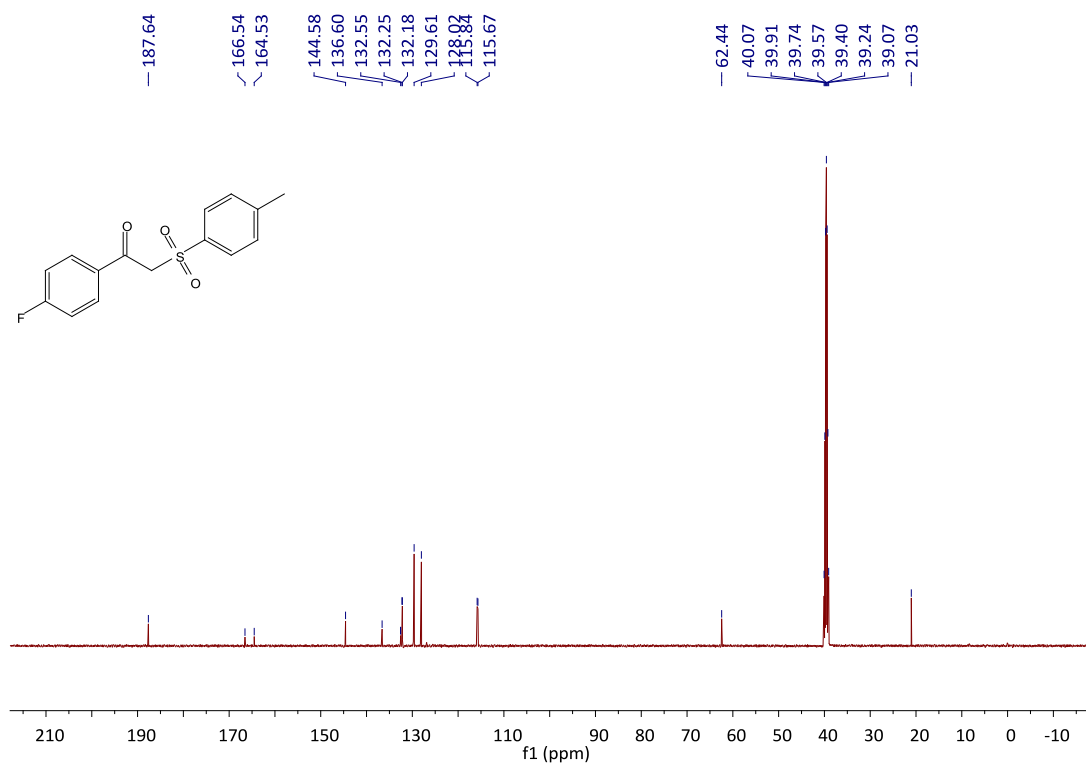

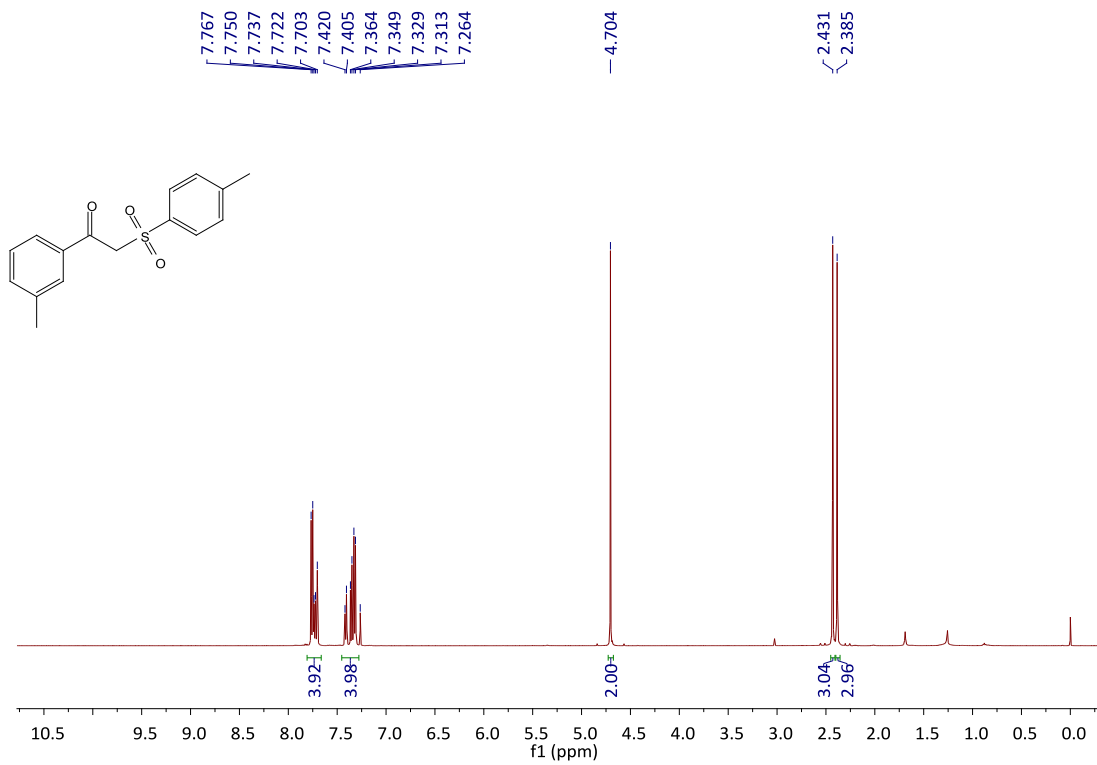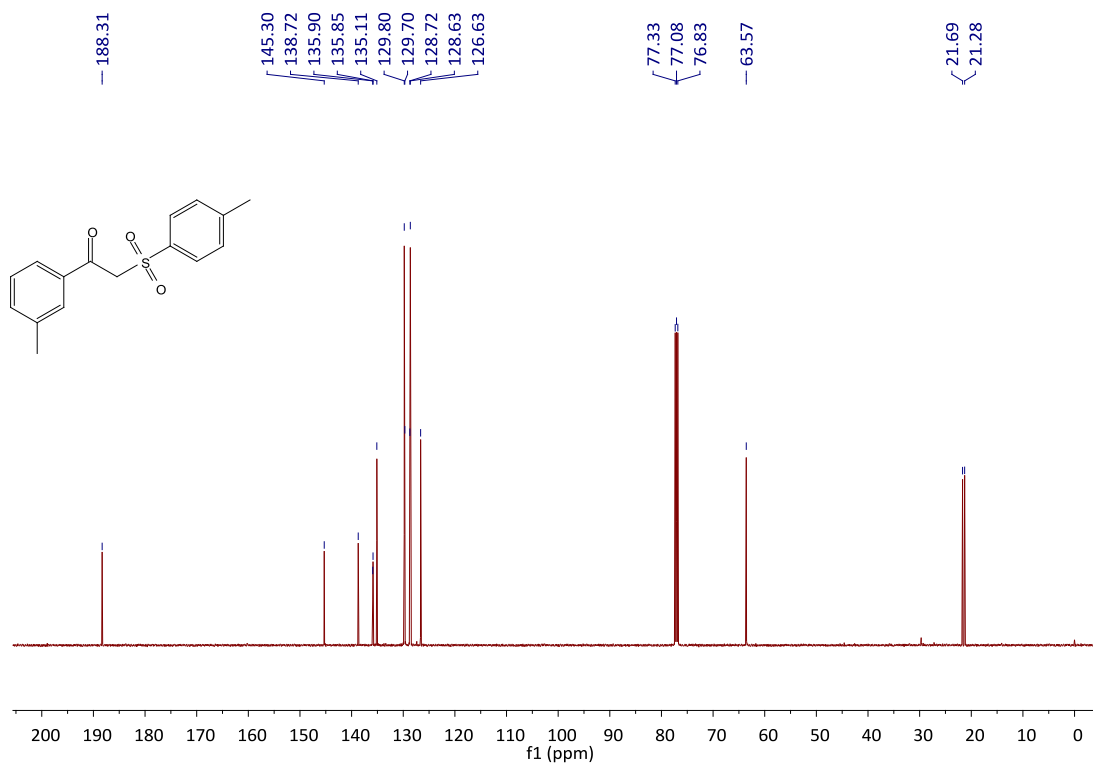

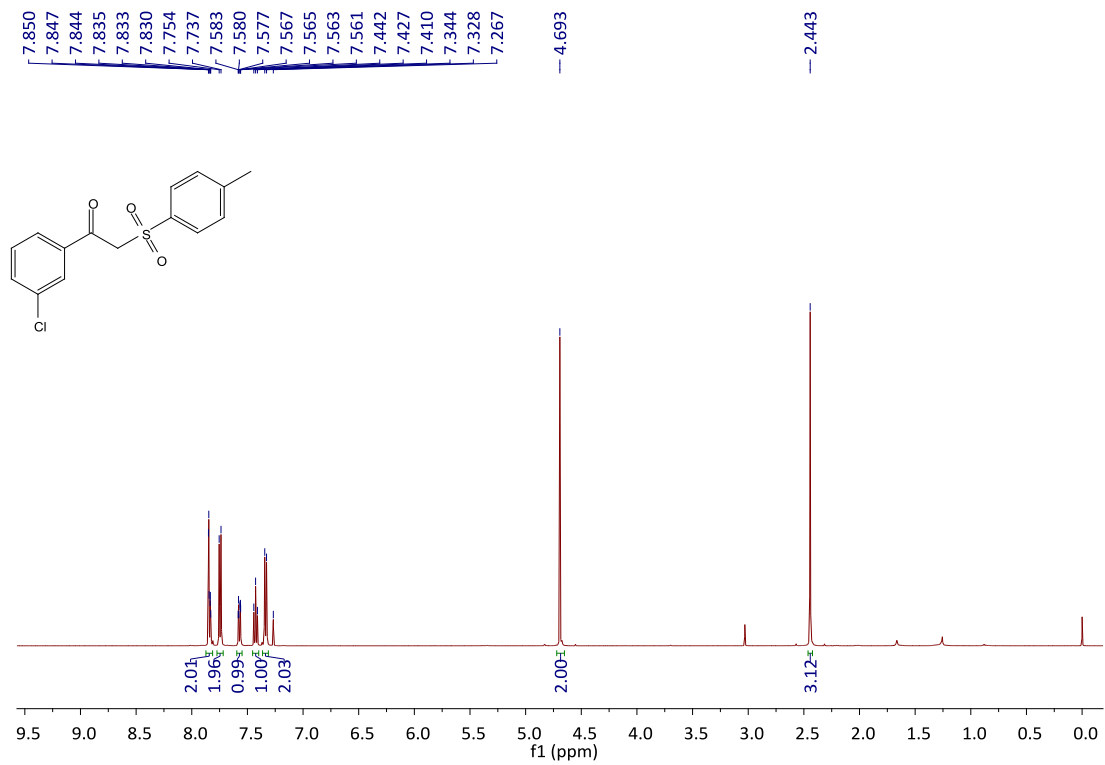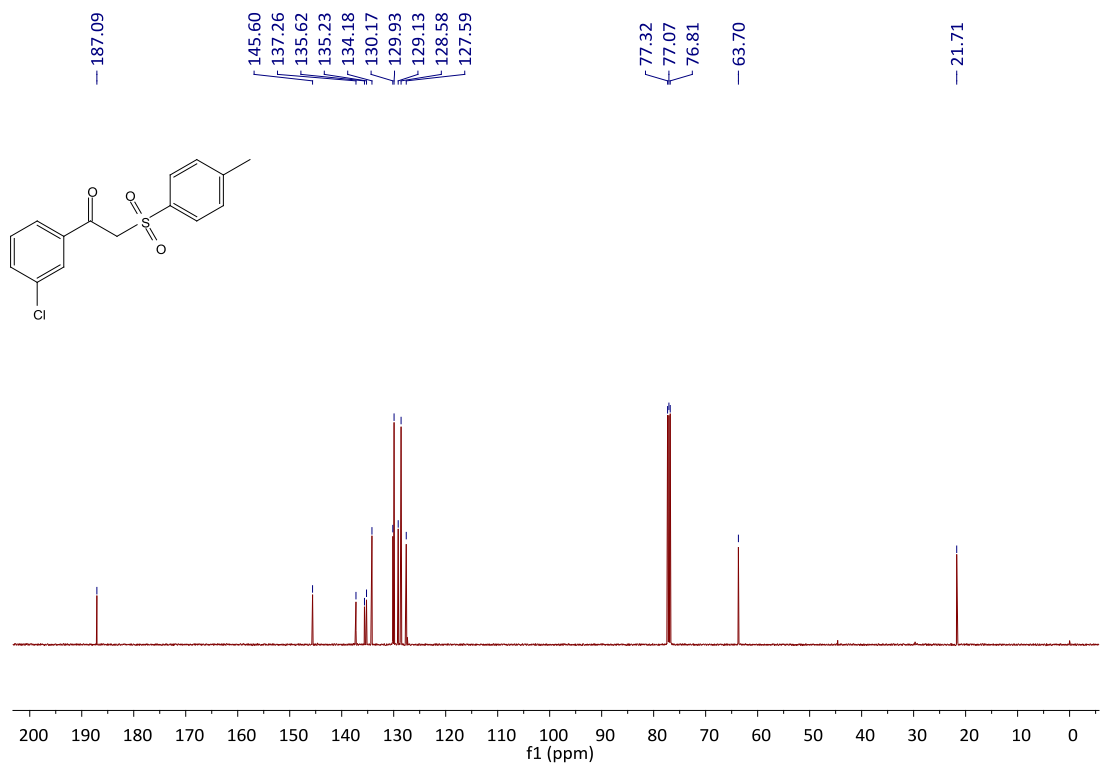

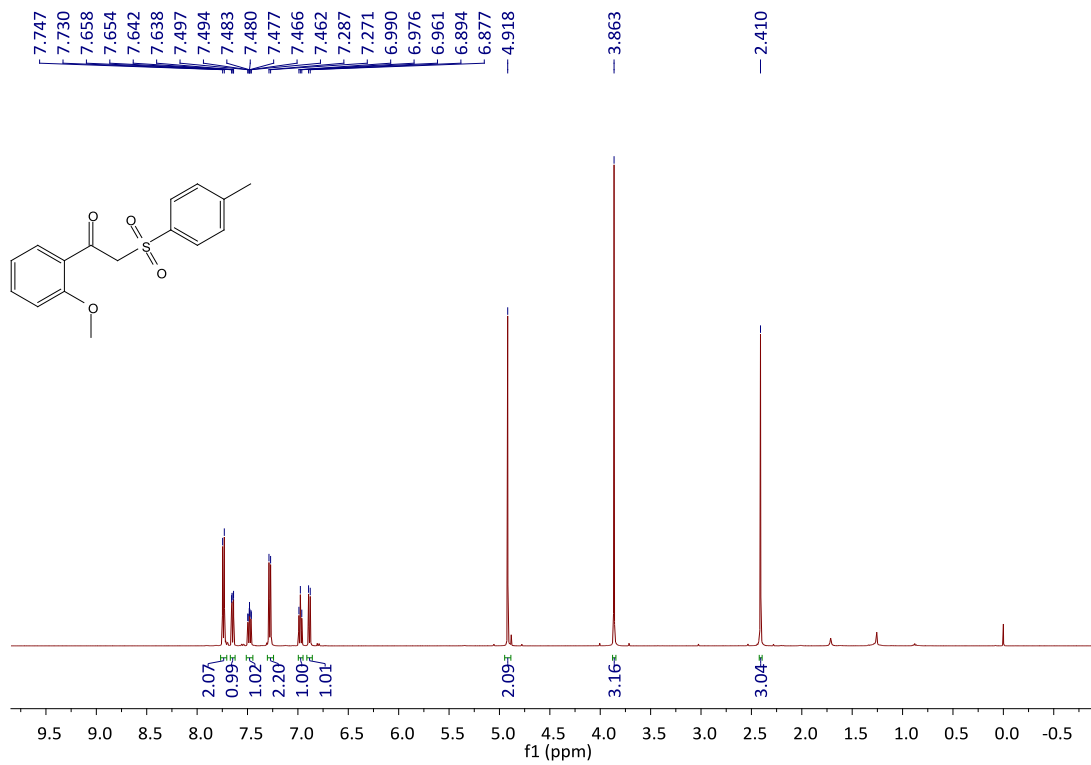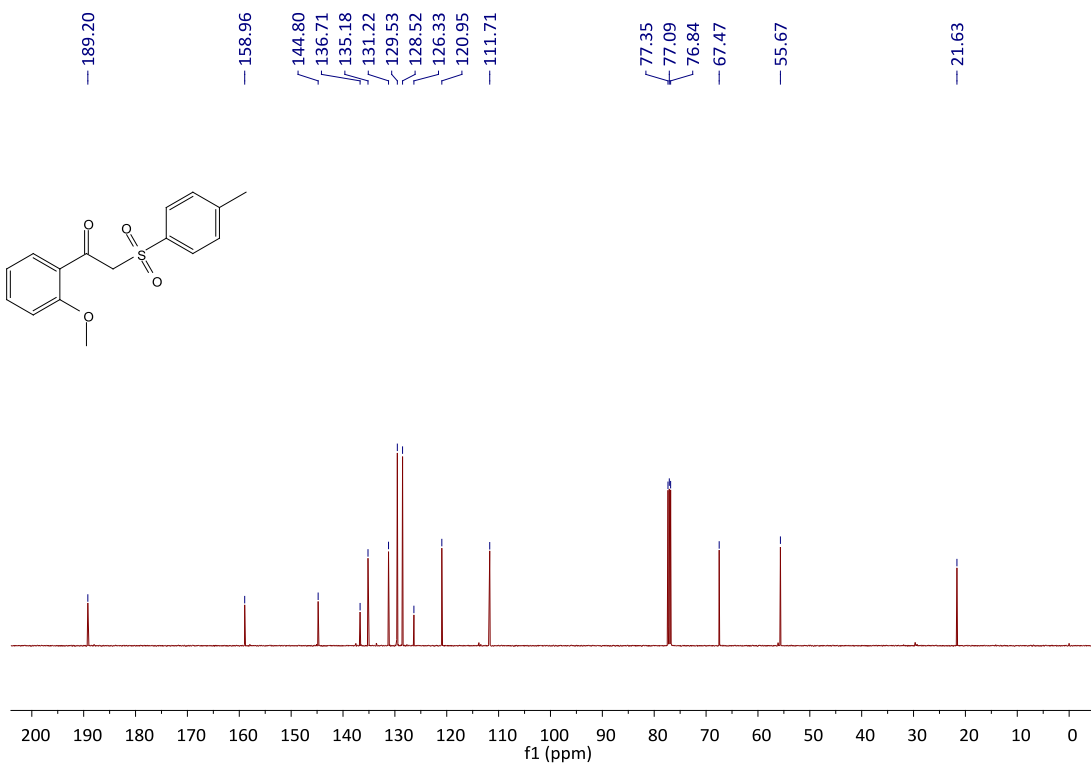

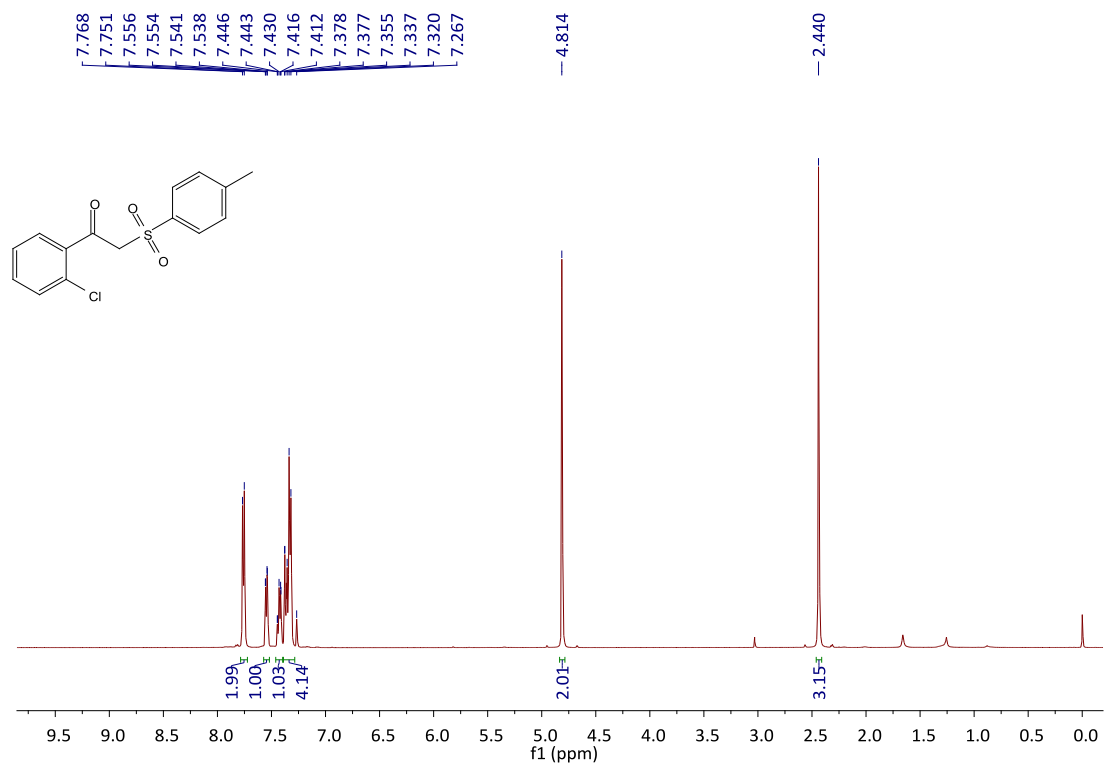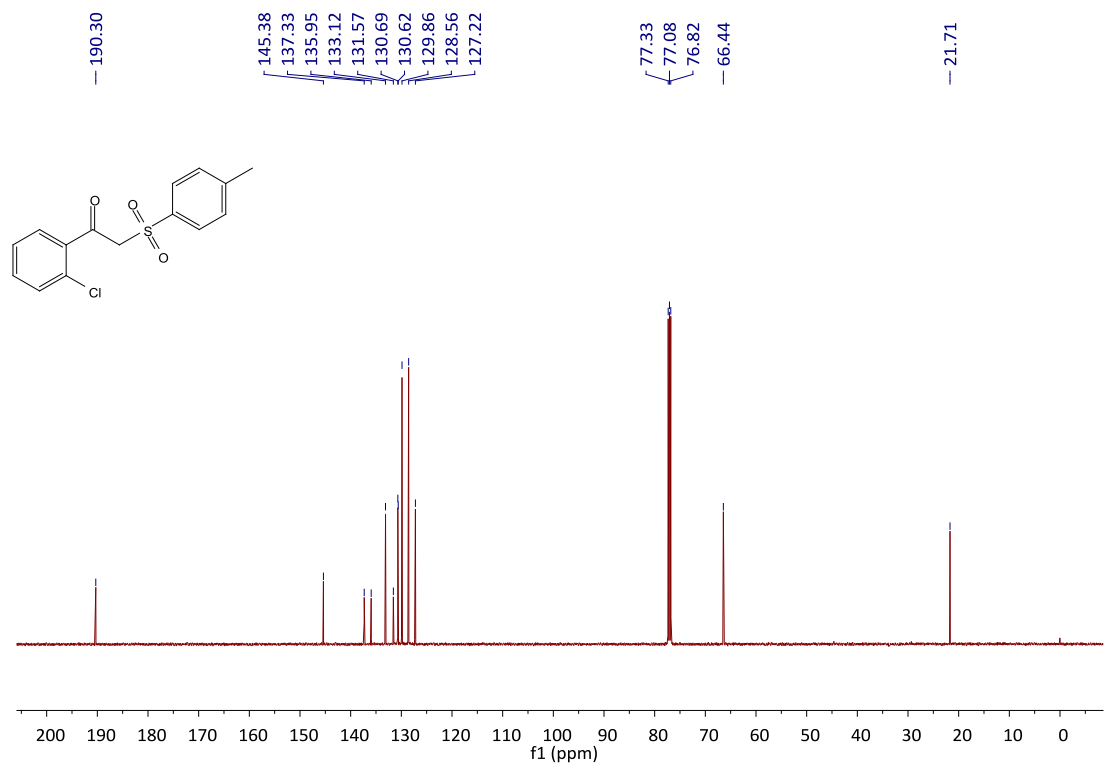

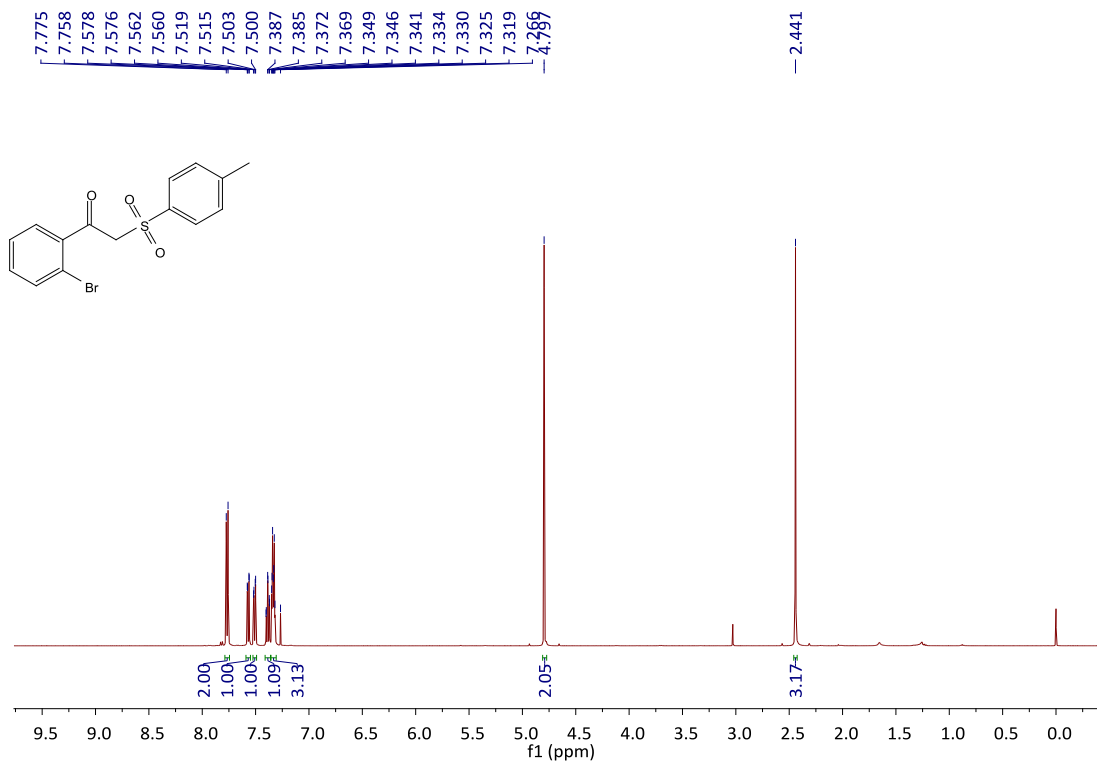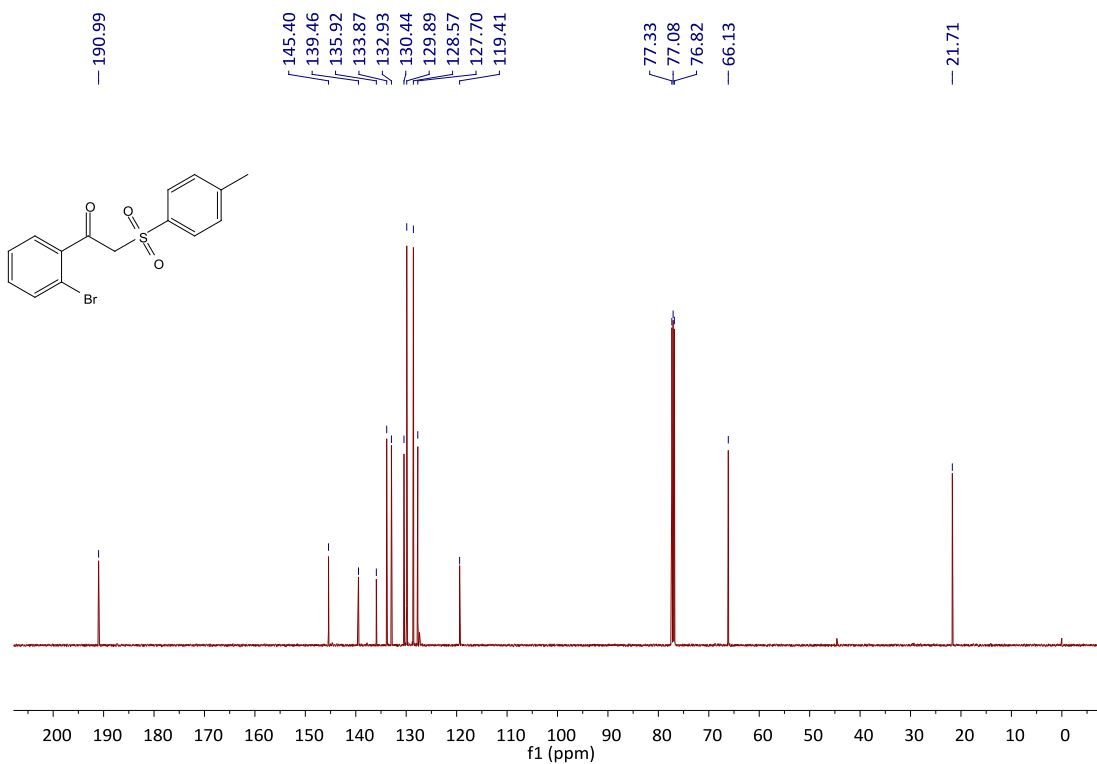

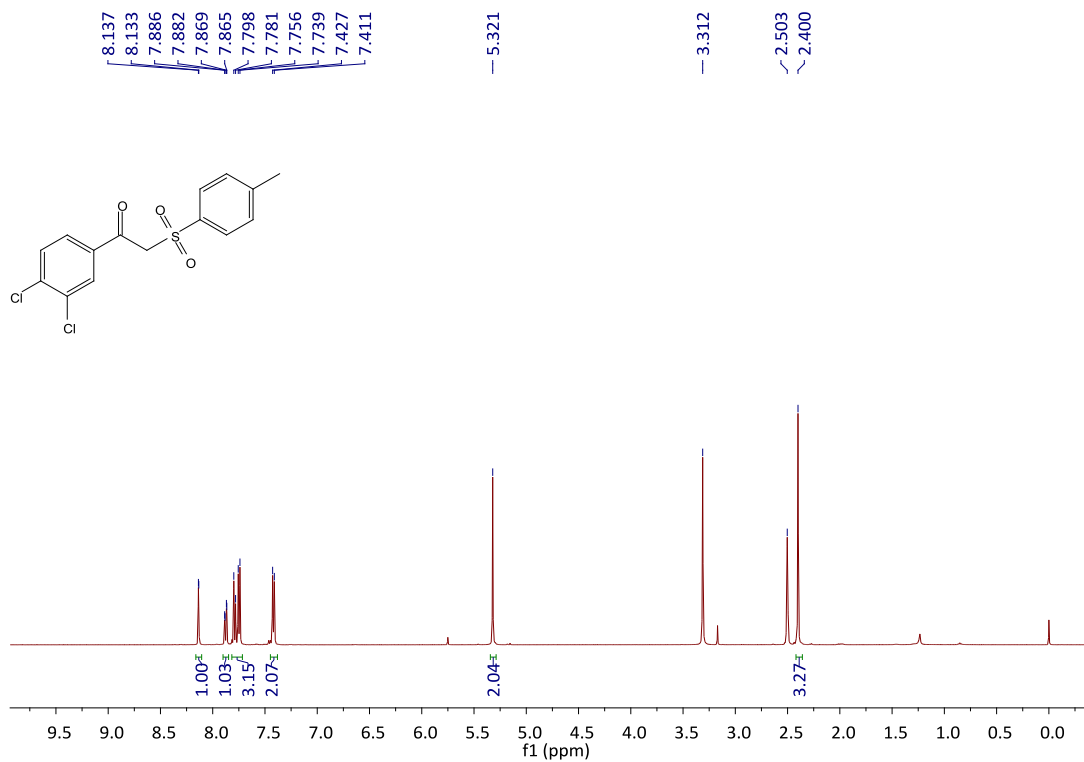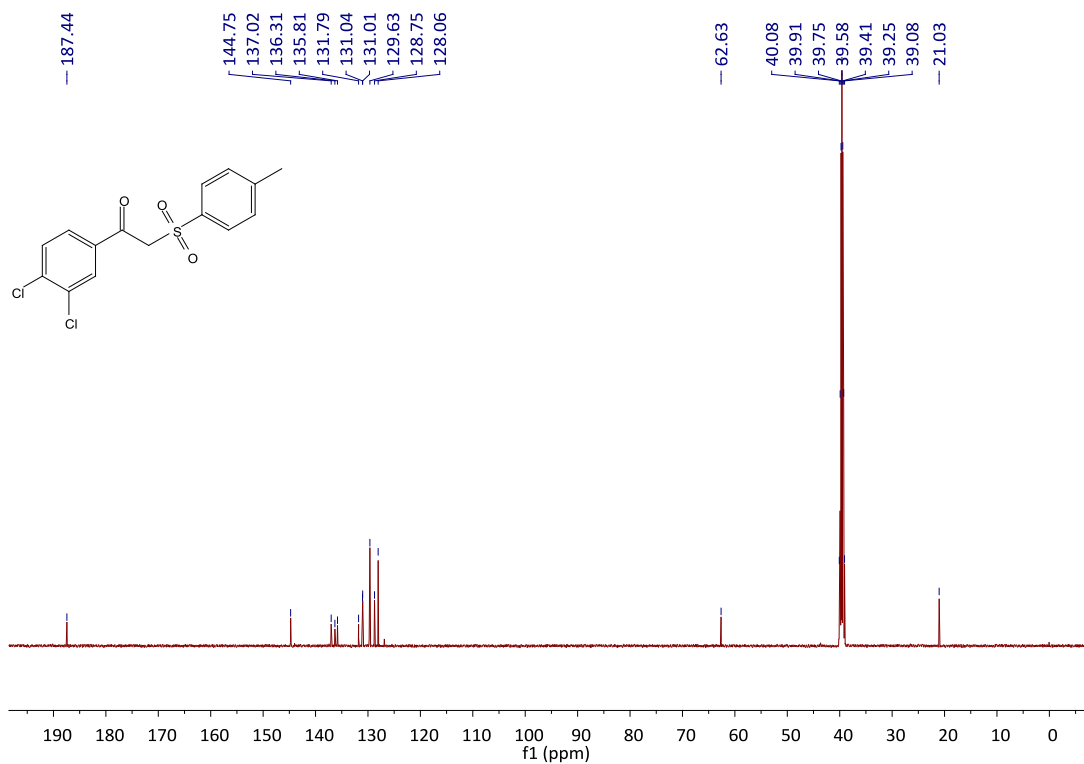



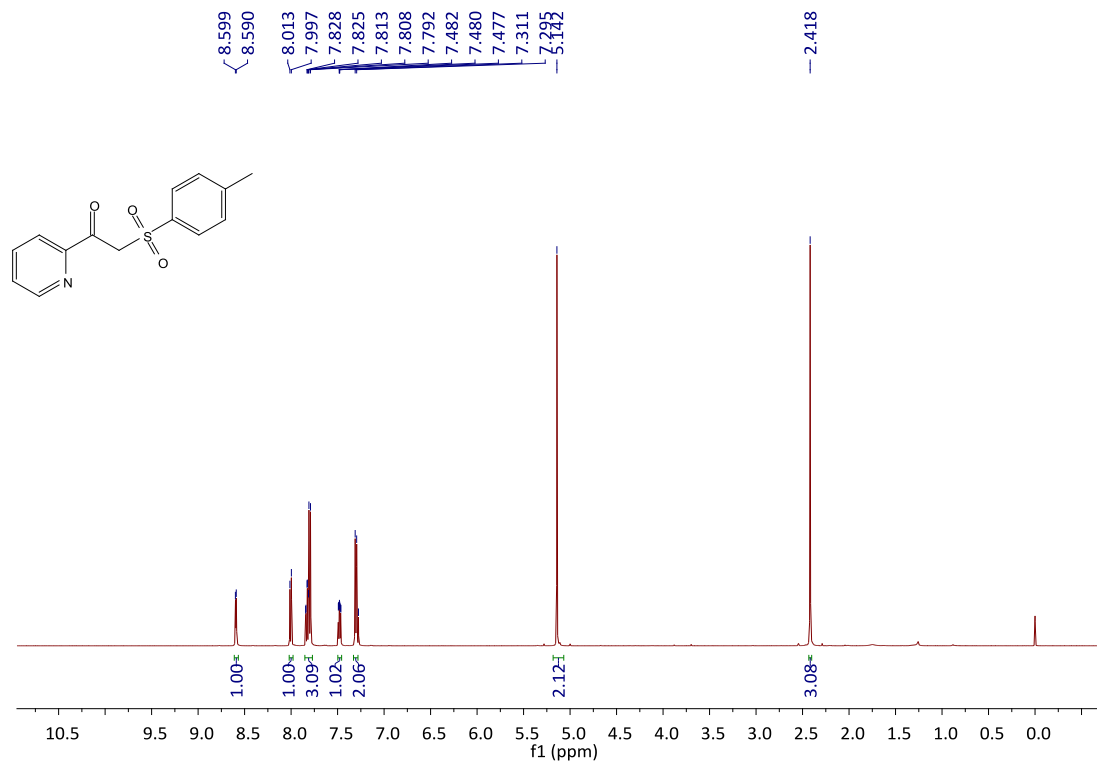

$^1\text{H}$  NMR (500 Hz,  $\text{CDCl}_3$ ): **3wa**

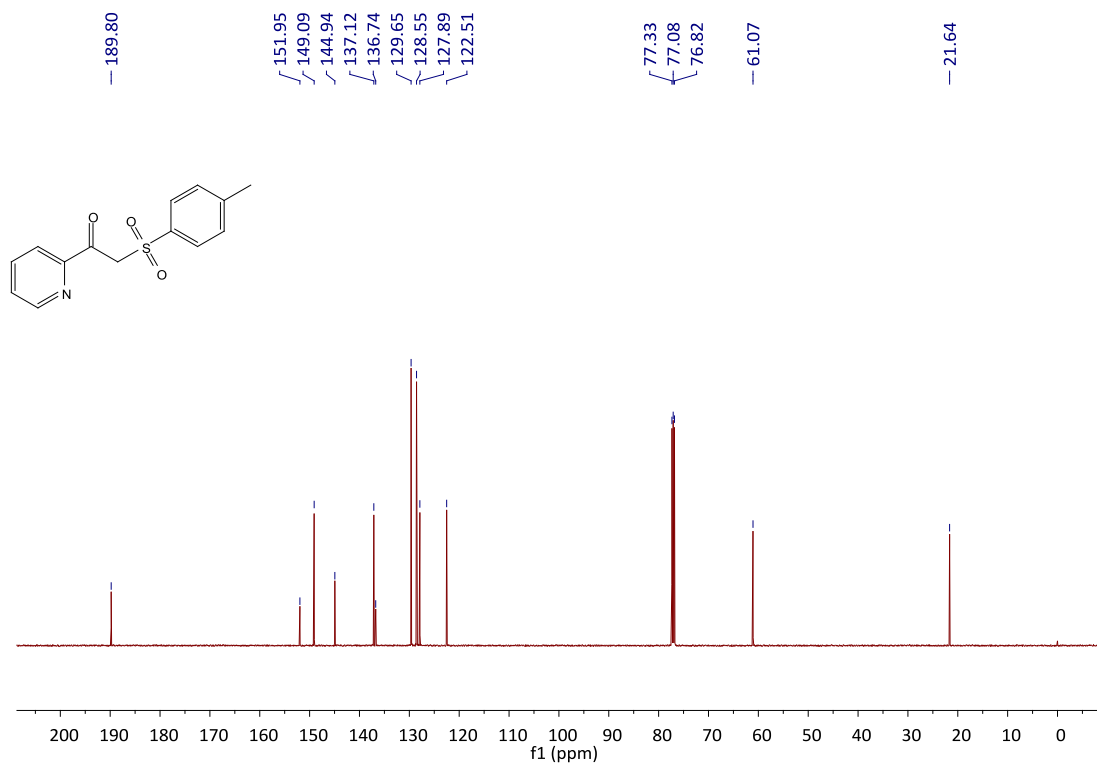

$^{13}\text{C}$  NMR (125 Hz,  $\text{CDCl}_3$ ): **3wa**

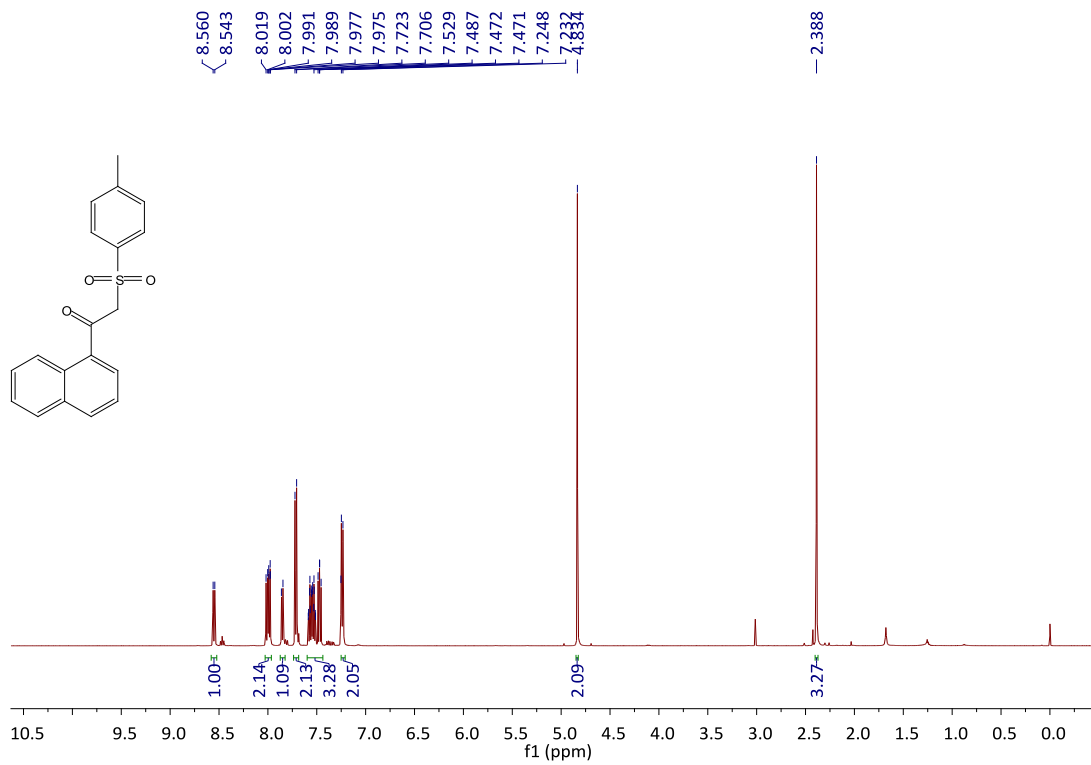

$^1\text{H}$  (500 Hz,  $\text{CDCl}_3$ )NMR: **3xa**

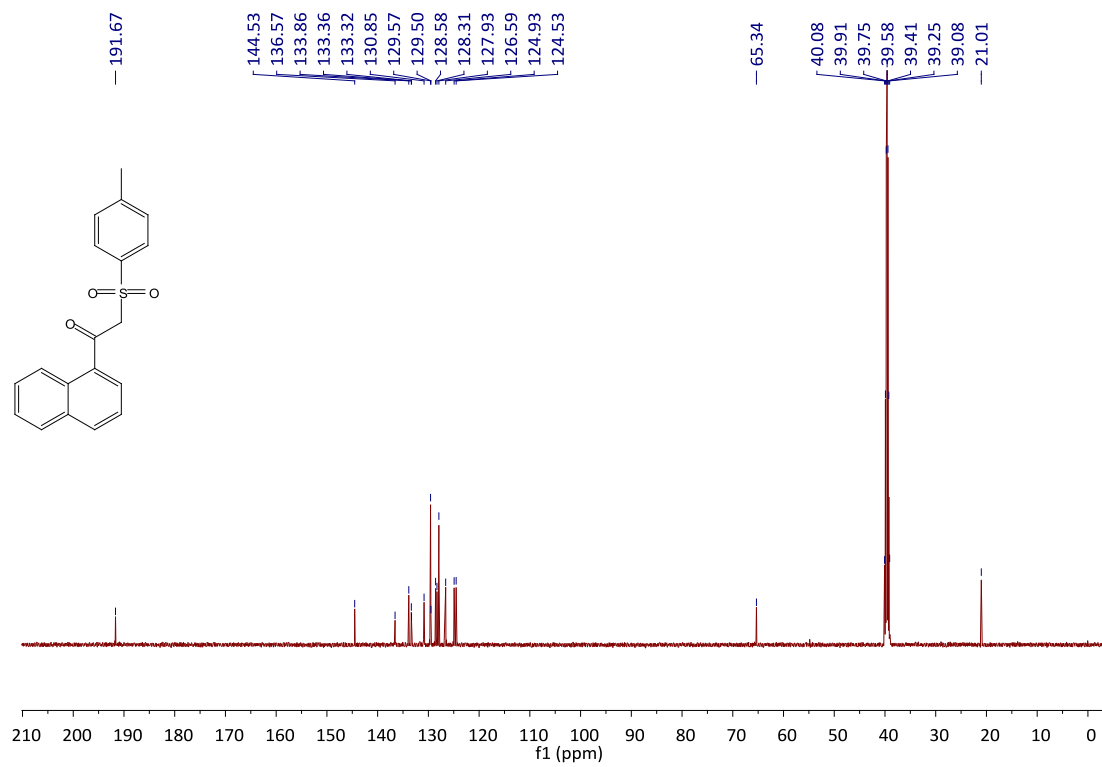

$^{13}\text{C}$  NMR(125 Hz, DMSO): **3xa**

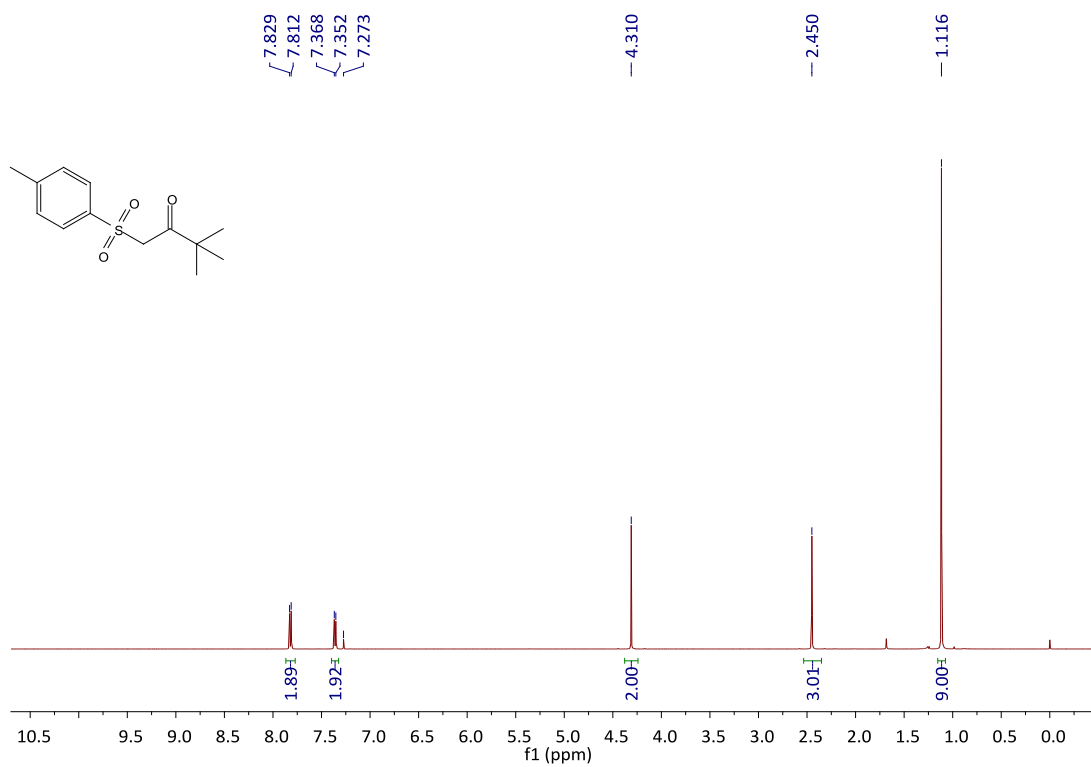

$^1\text{H}$  NMR(500 Hz,  $\text{CDCl}_3$ ): **3ya**

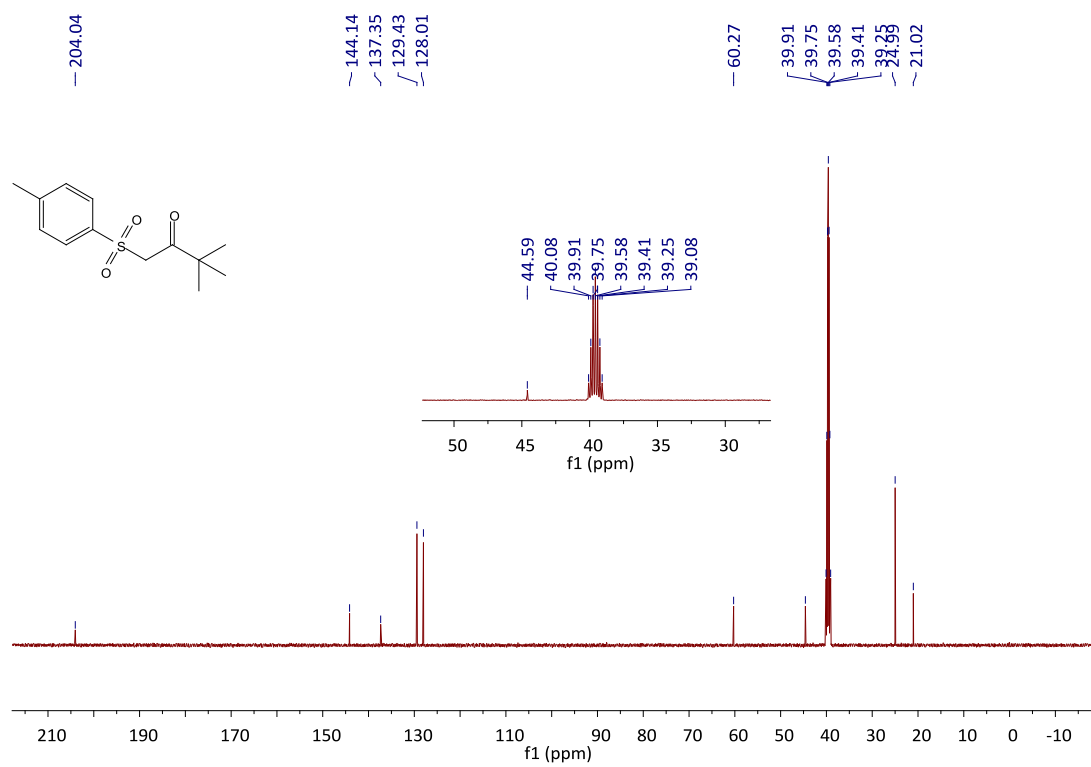

$^{13}\text{C}$  NMR(125 Hz, DMSO): **3ya**

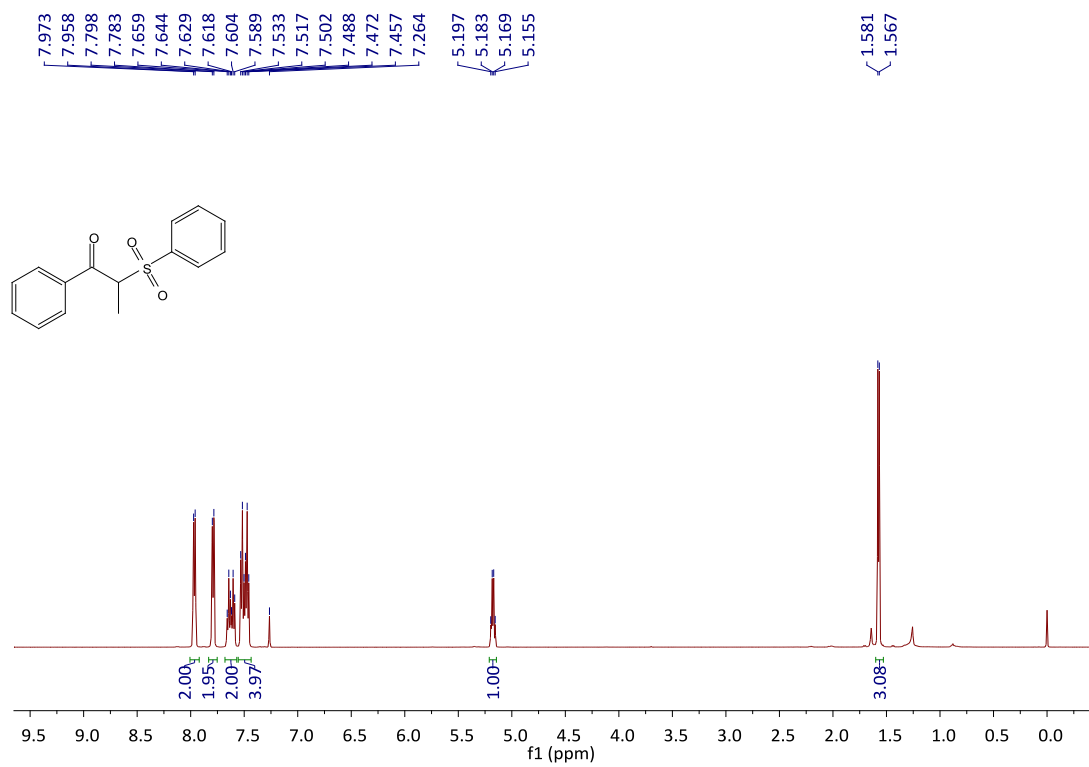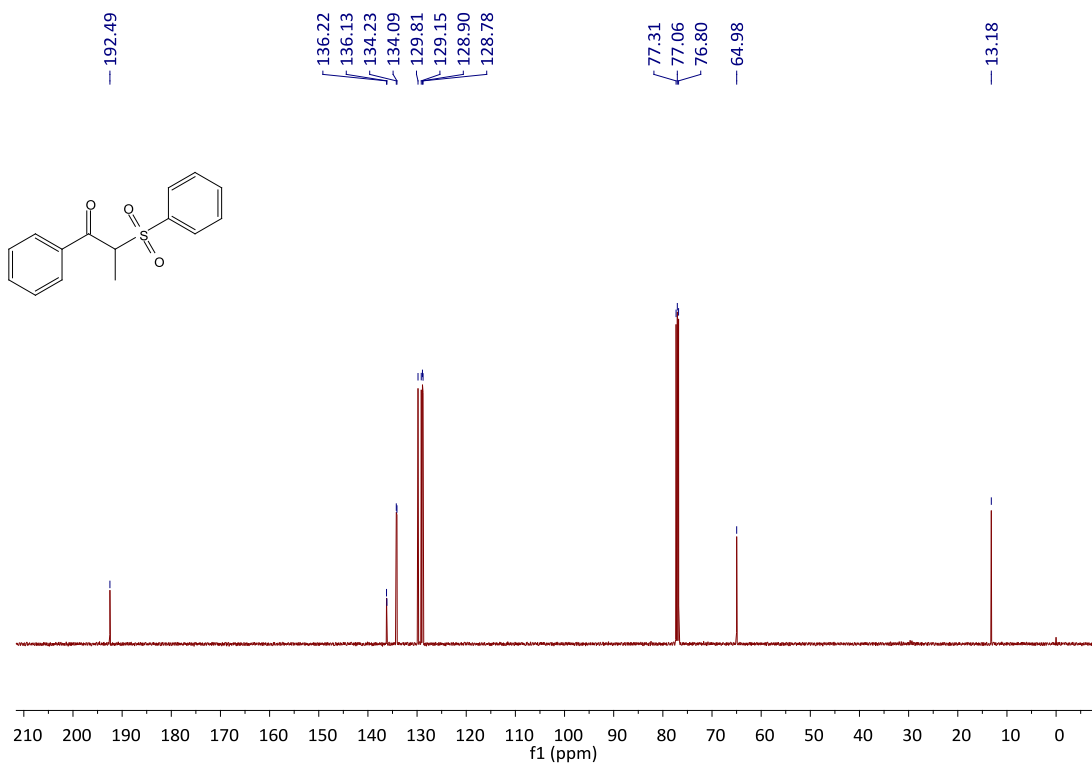



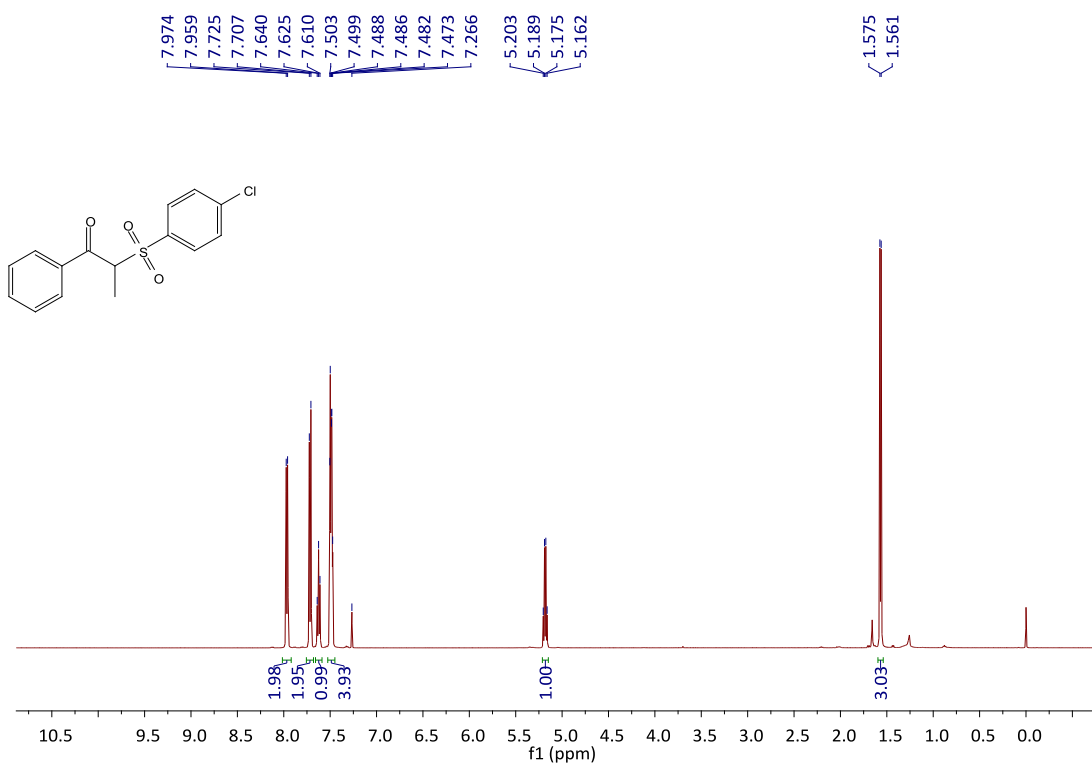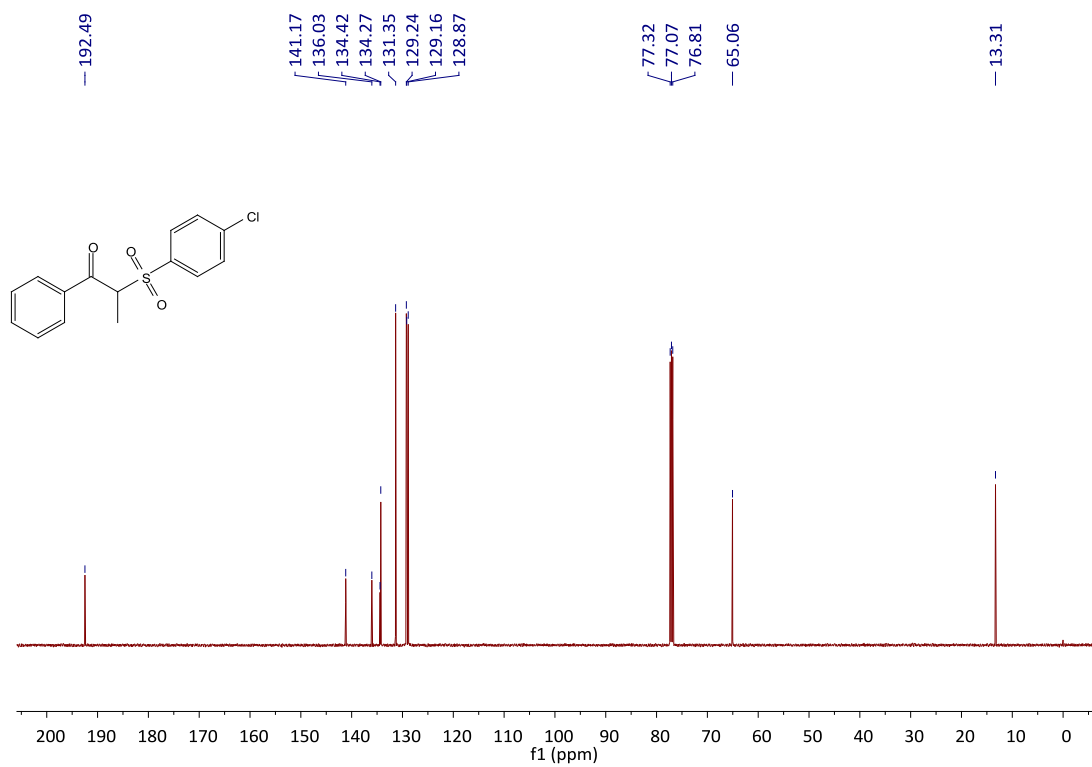

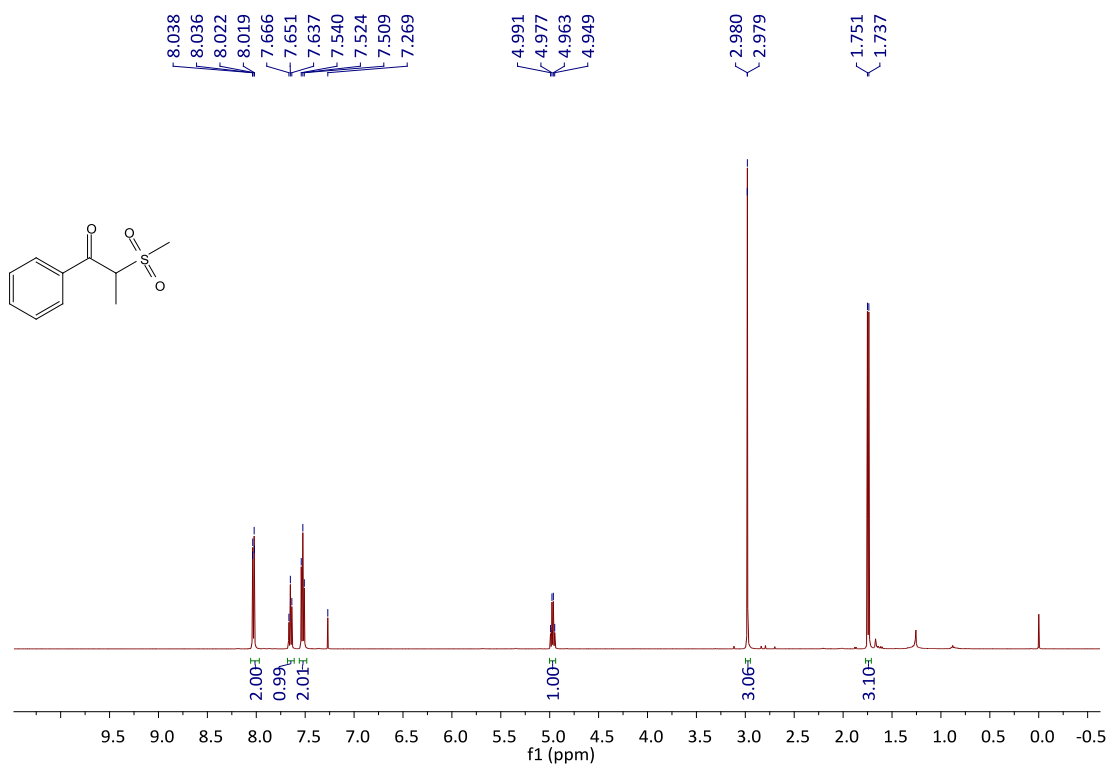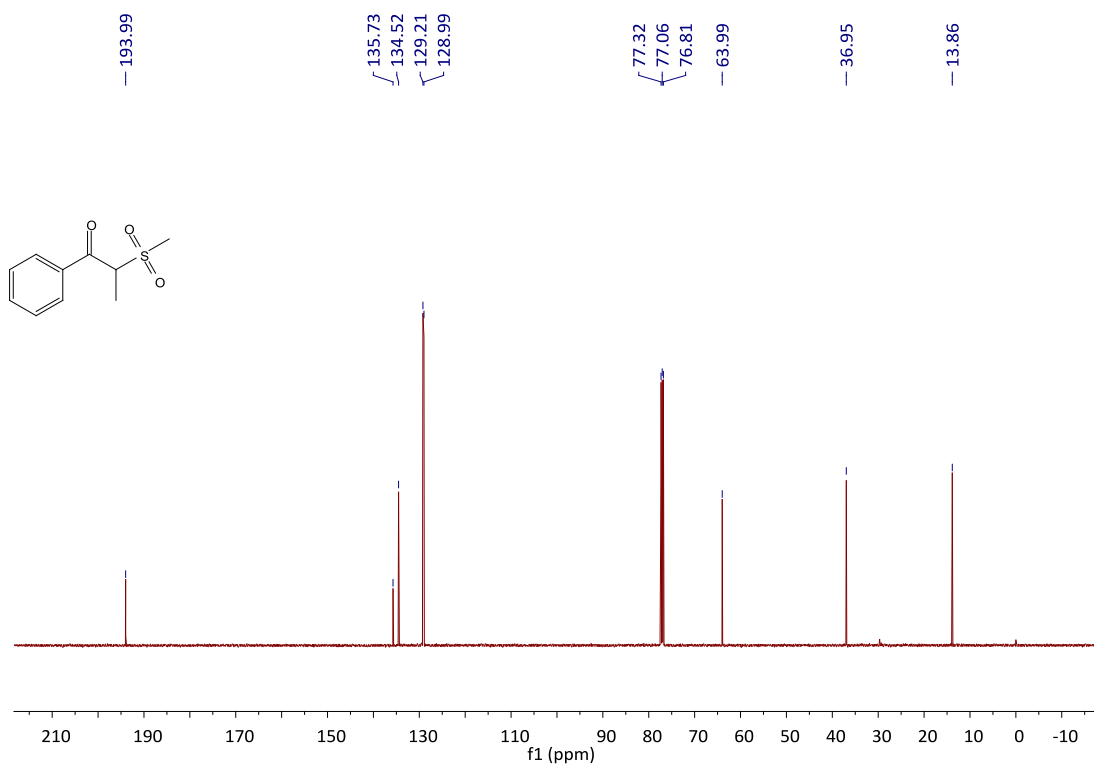

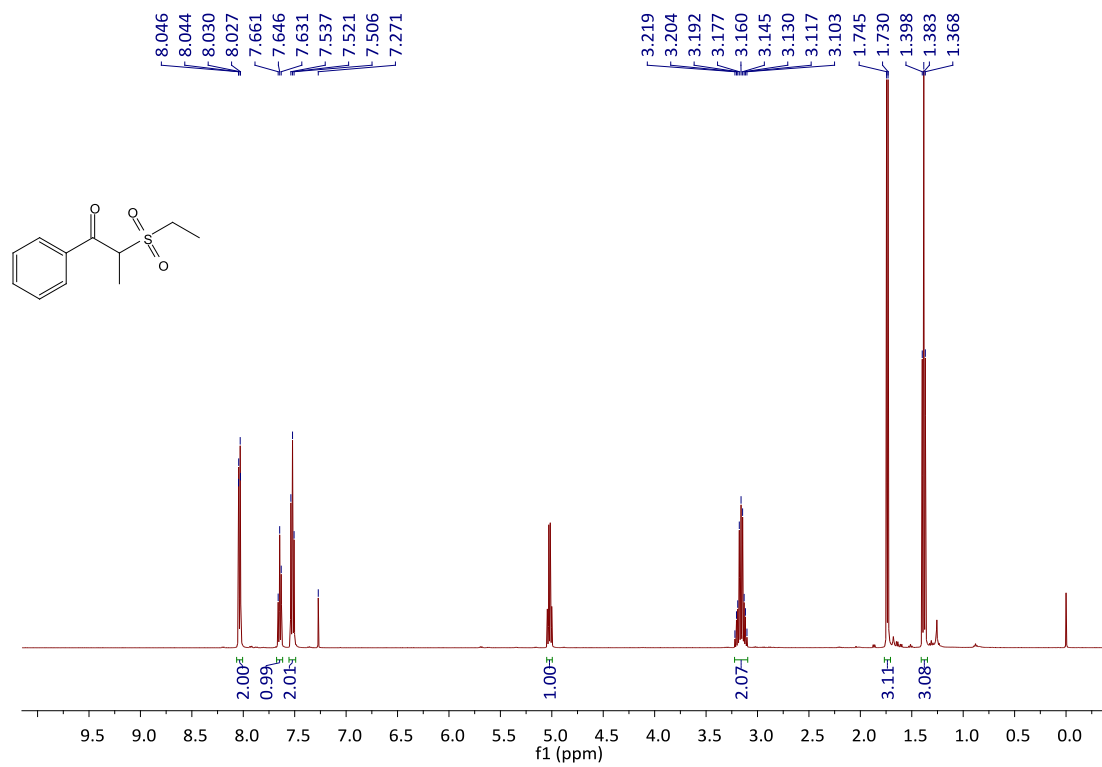

$^1\text{H NMR}$ (500 Hz,  $\text{CDCl}_3$ ): **3bf**

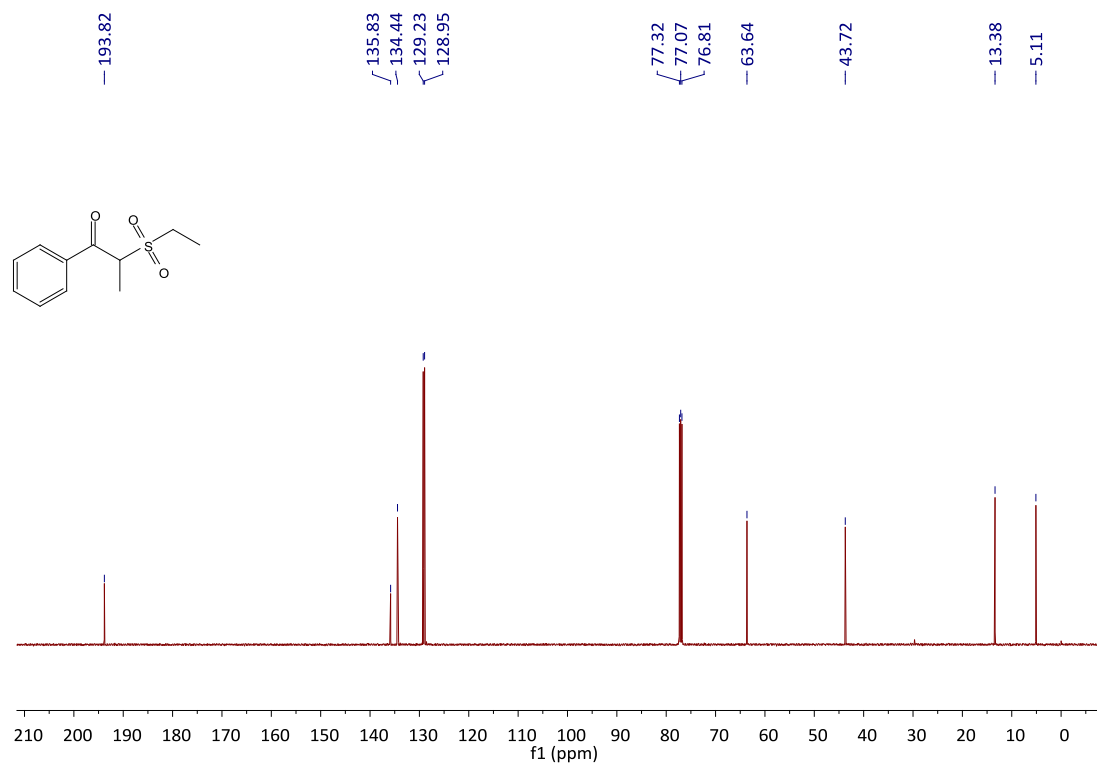



<sup>13</sup>C NMR(125 Hz, CDCl<sub>3</sub>): **3bf**

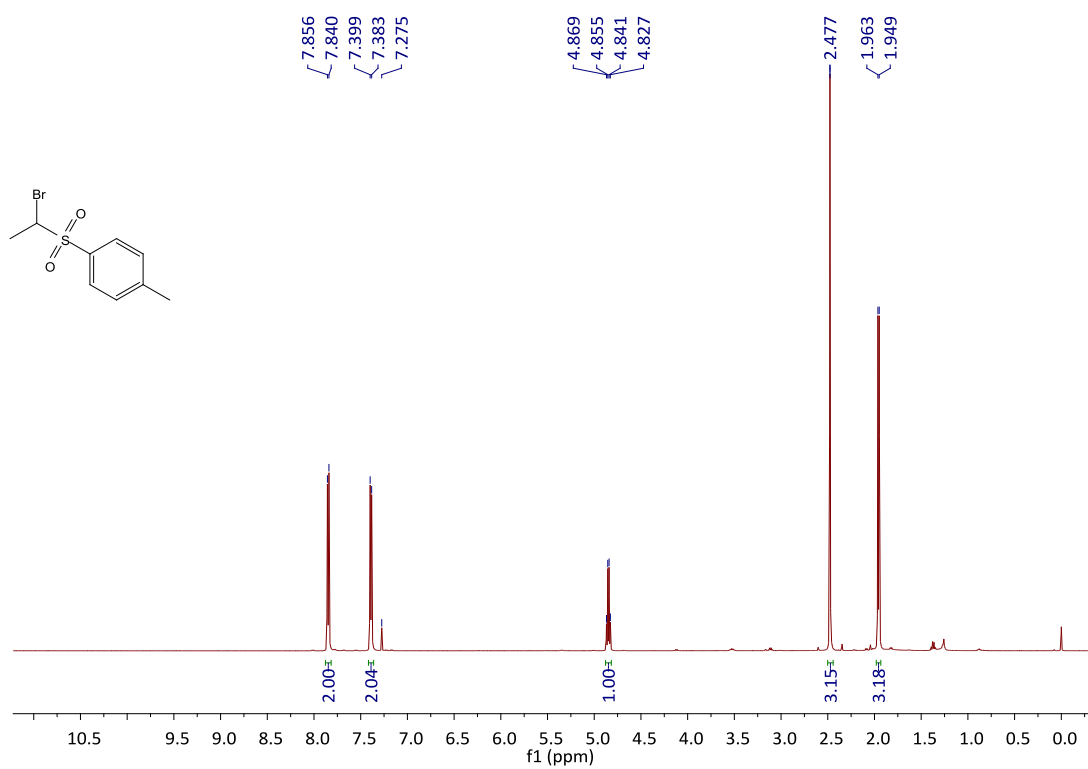

<sup>1</sup>H NMR(500 Hz, CDCl<sub>3</sub>): **5**

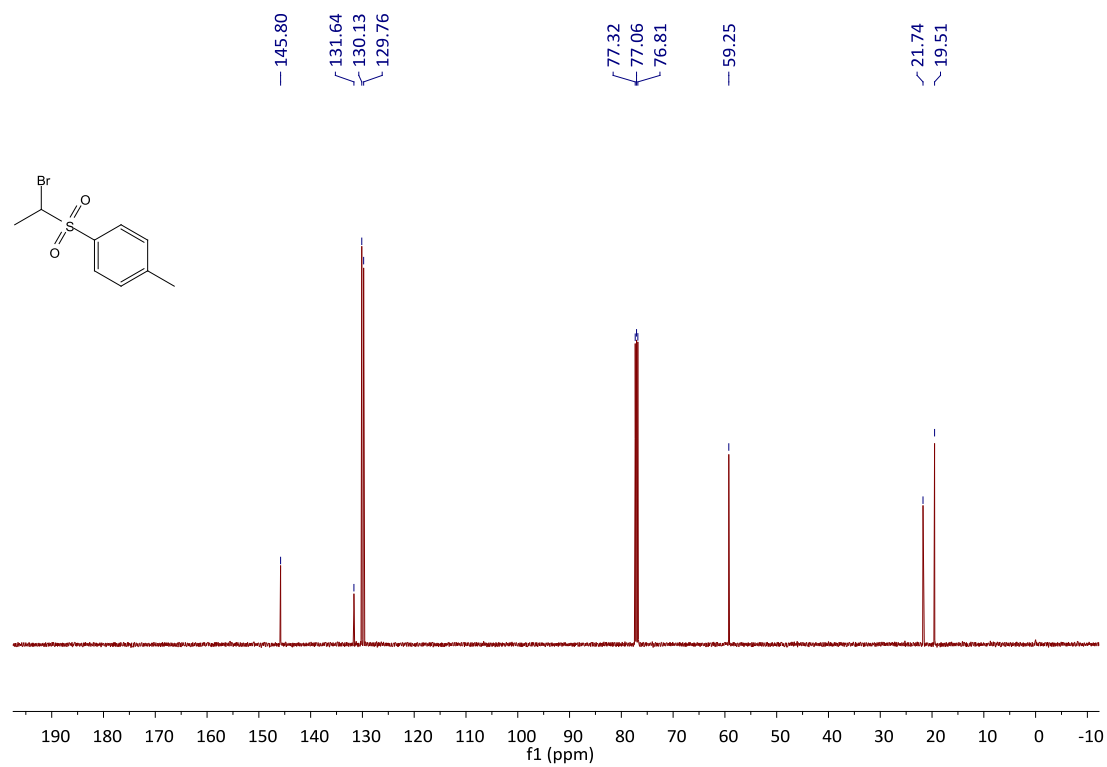

<sup>13</sup>C NMR(125 Hz, CDCl<sub>3</sub>): **5**

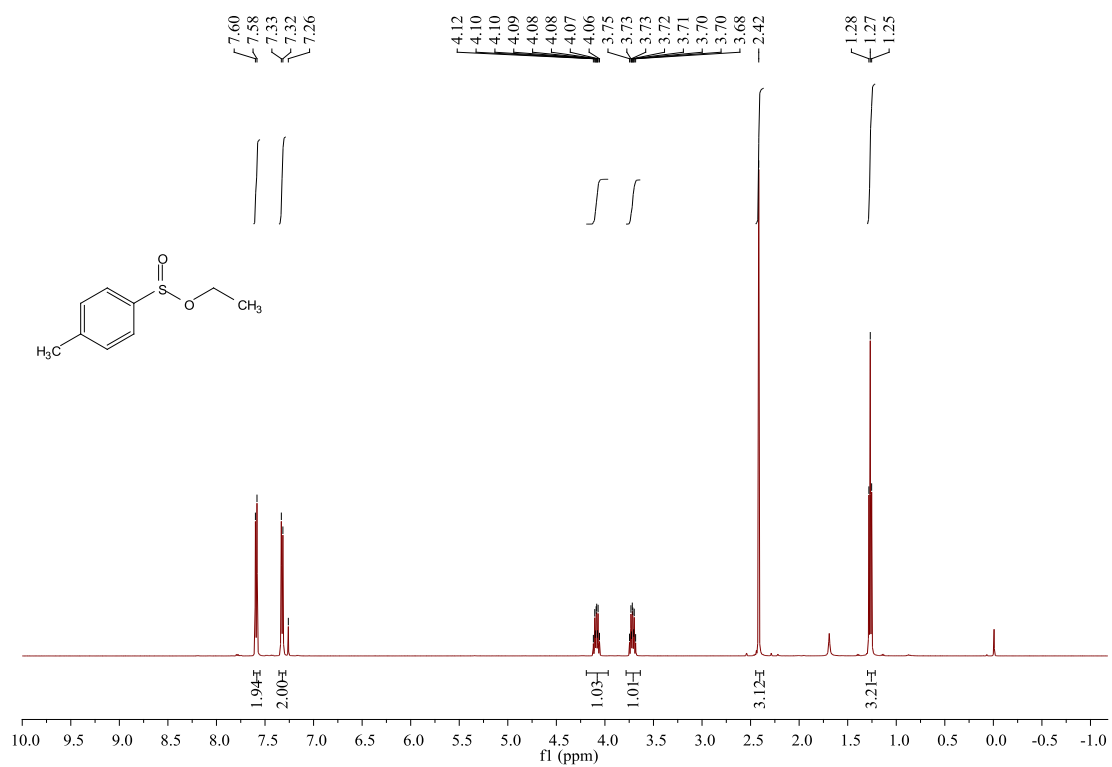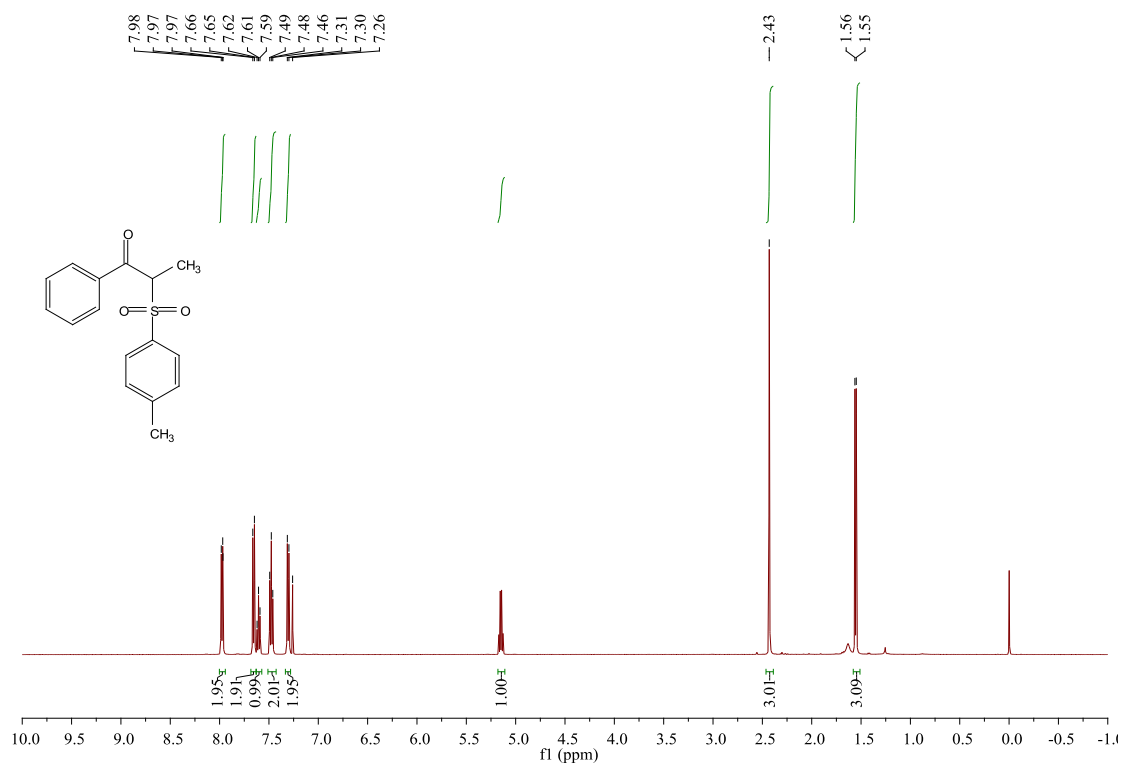

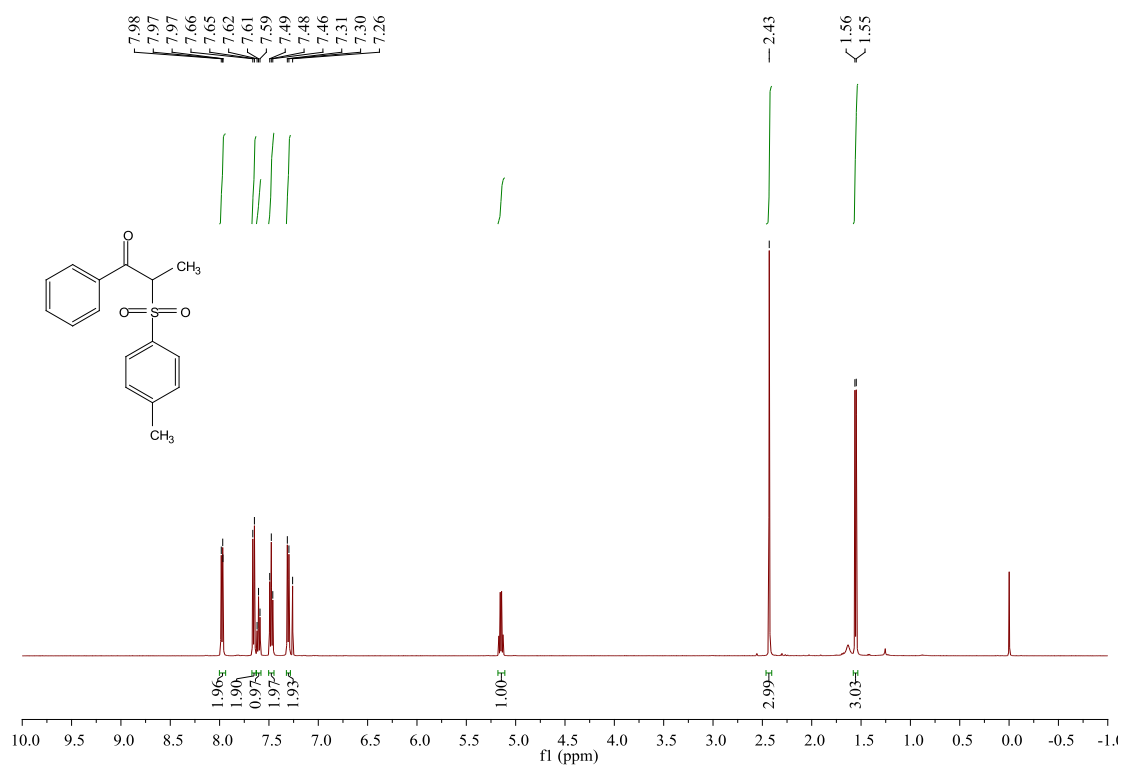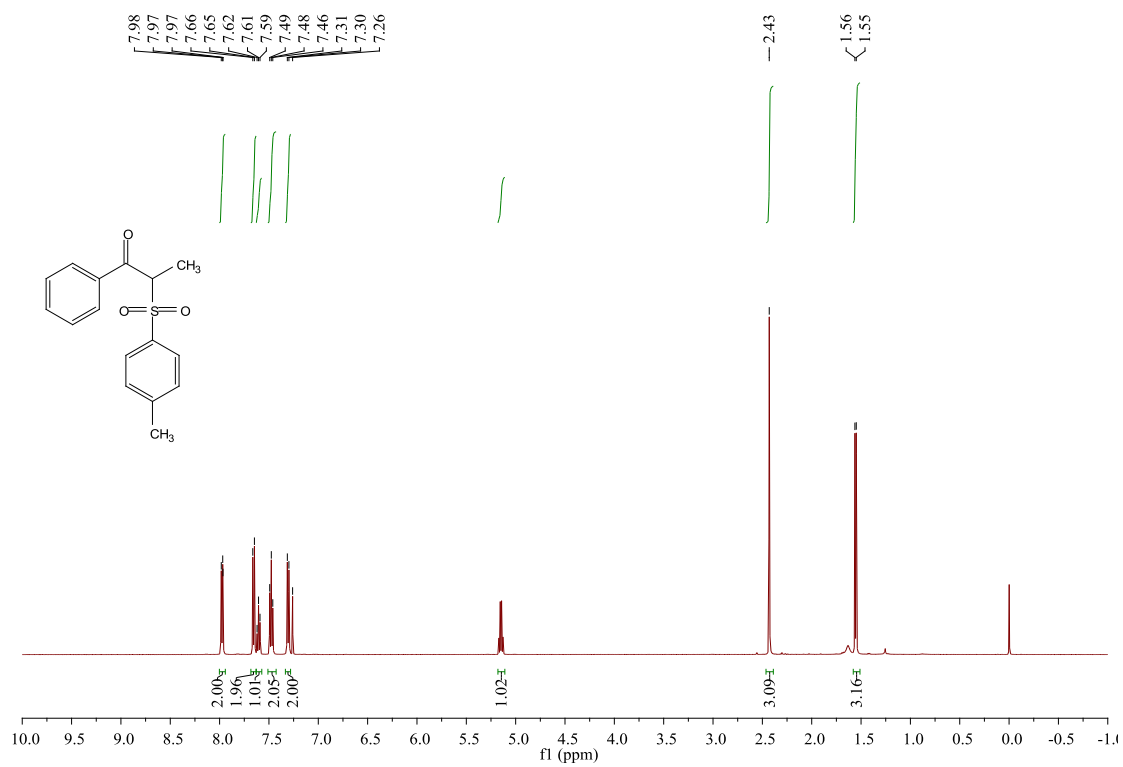

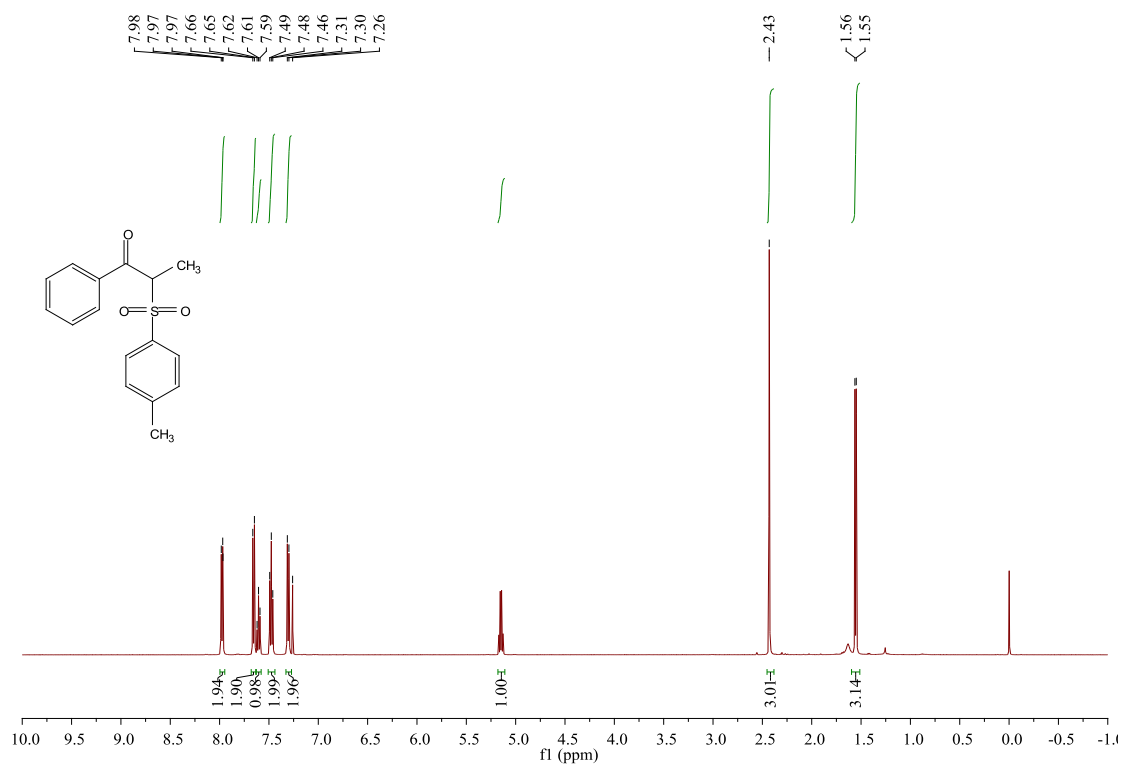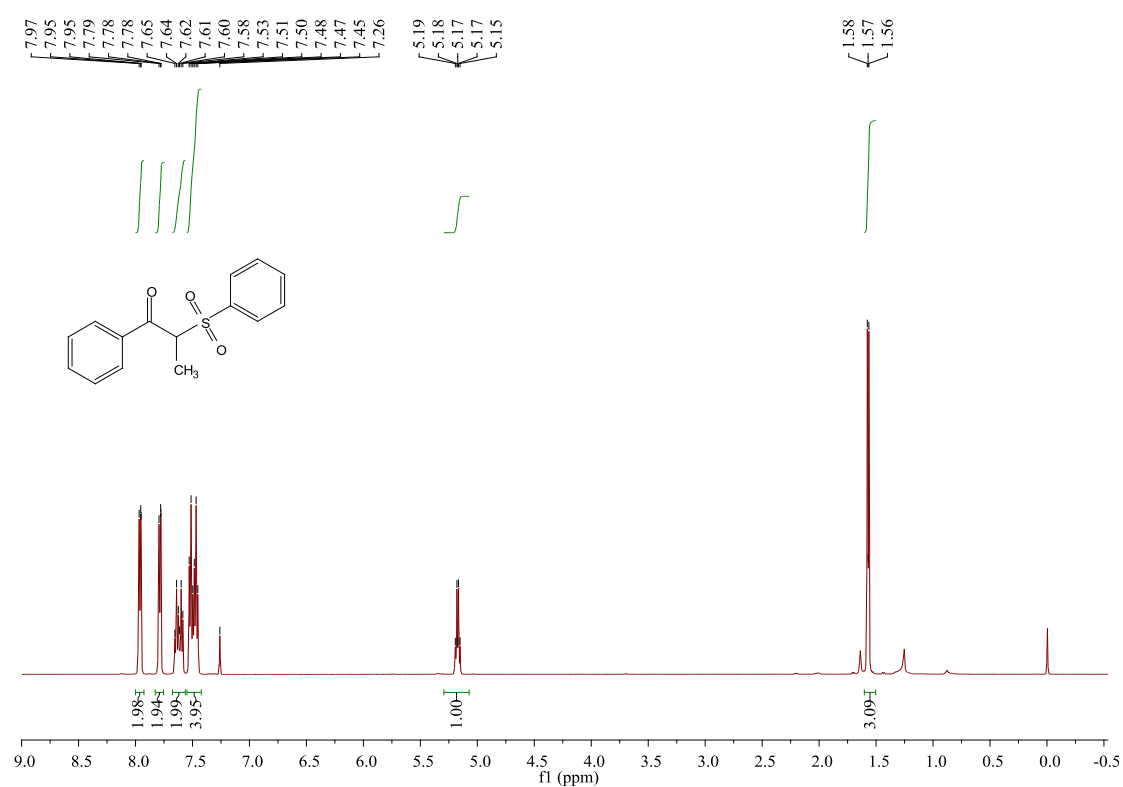

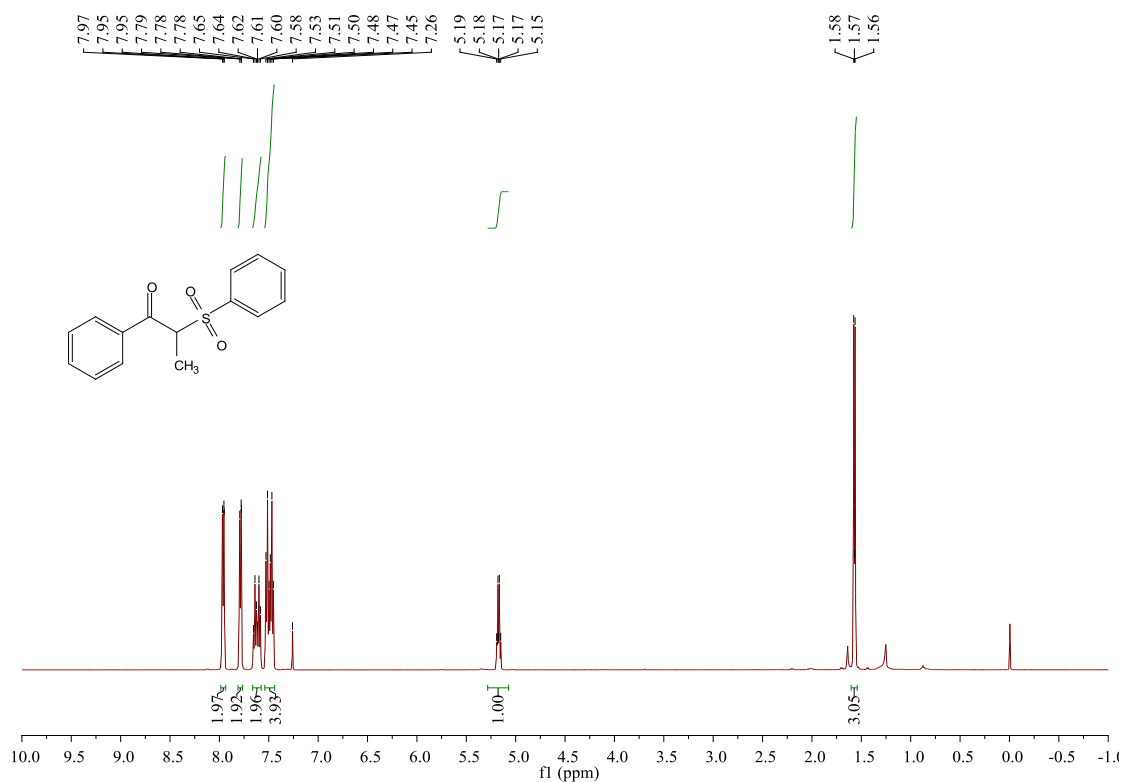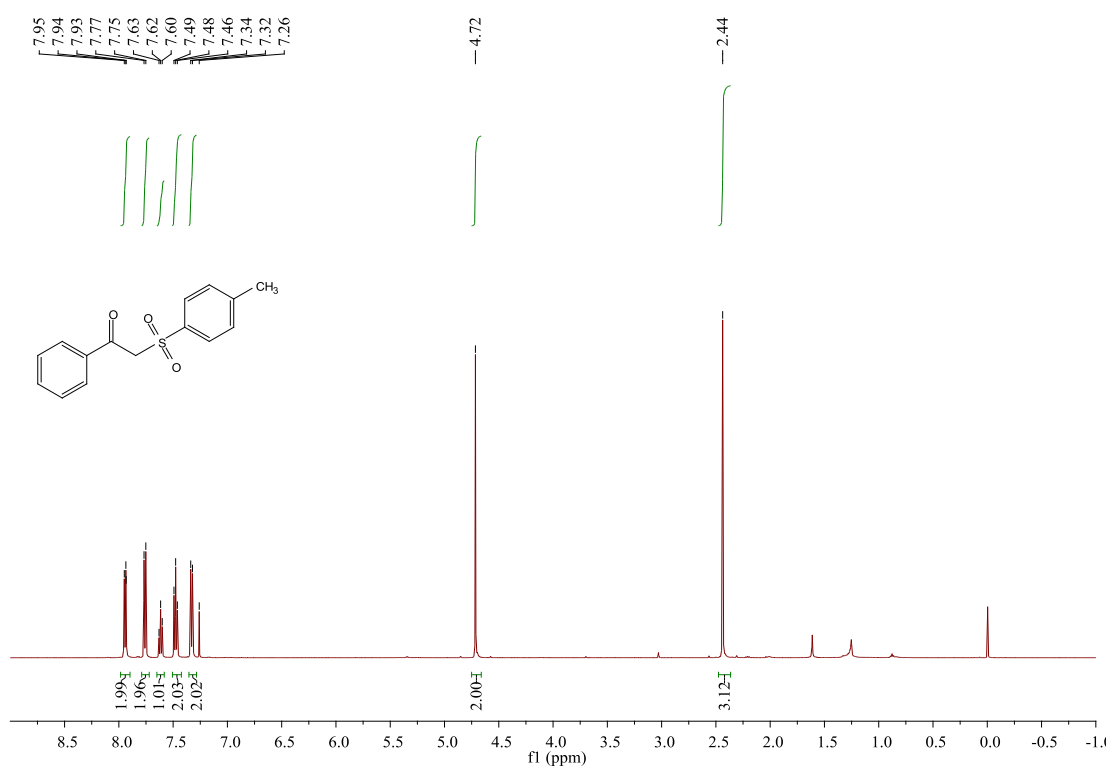

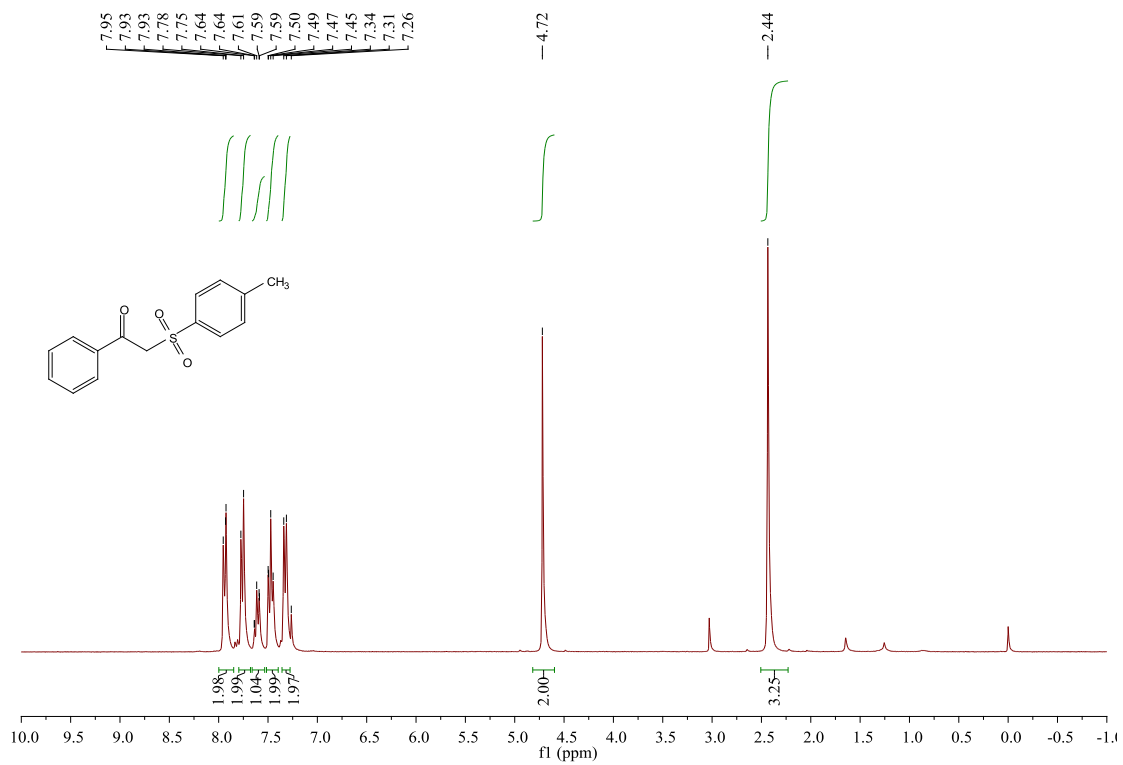

$^1\text{H}$  NMR (500 Hz,  $\text{CDCl}_3$ ): **3ka** (Scheme 3b)
